# Supplementary material for: B(C 6 F 5 ) 3 -catalyzed one-pot selenation of phosphonates and indoles
Source: Royal Society of Chemistry journal article supplement (doi:10.1039/d5nj03782d), 2025-01-01

*Supporting Information*

**B(C<sub>6</sub>F<sub>5</sub>)<sub>3</sub>-Catalyzed One-Pot Selenation of Phosphonates and  
Indoles**

Ying Chen, Xin Li, Dongfang Wu, Ruijie Tao, Yong Ling and Gong-Qing Liu\*

*Organoselenium Synthesis and Function Laboratory, School of Pharmacy, Nantong University,  
Nantong 226019, People's Republic of China.*

E-mail: [gqliu@ntu.edu.cn](mailto:gqliu@ntu.edu.cn)

**Content**

|                                                                    |     |
|--------------------------------------------------------------------|-----|
| 1. General information .....                                       | S2  |
| 2. Optimization of the reaction conditions .....                   | S2  |
| 3. Mechanistic studies .....                                       | S3  |
| 1) IR spectroscopy studies.....                                    | S3  |
| 2) NMR studies .....                                               | S4  |
| 3) HCN generation detection.....                                   | S4  |
| 4. General procedure for the synthesis of phosphoroselenoates..... | S6  |
| 5. General procedure for the synthesis of 3-selenylindoles.....    | S18 |
| 6. References .....                                                | S23 |
| 7. Copies of NMR spectra .....                                     | S24 |

## 1. General information

### Solvents and reagents

Reagents were used as received without further purification unless otherwise indicated. Solvents were dried and distilled prior to use. Petroleum ether used had a boiling point range of 60–90°C.

### Chromatography

Chromatographic purification of products was performed as flash column chromatography on silica gel (200–300 meshes). Thin-layer chromatography (TLC) was carried out on silica plates (TLC Silica GF<sub>254</sub>). Visualization of the compounds was accomplished by projecting UV-light onto the developed plates.

### Instrumentations

- NMR spectra were recorded on a Bruker Avance- III HD (<sup>1</sup>H NMR: 400 MHz, <sup>13</sup>C NMR: 100 MHz) spectrometer. Chemical shifts are referenced to residual solvent signals (CDCl<sub>3</sub>: 7.26 ppm and 77.16 ppm for <sup>1</sup>H NMR and <sup>13</sup>C NMR respectively) and reported in parts per million (ppm) relative to tetramethylsilane (TMS). Spin–spin coupling constants (*J*) were given in Hz. Multiplicities of NMR signals are abbreviated as follows: br = broad, s = singlet, d = doublet, t = triplet, q = quartet, m = multiplet.
- High resolution mass spectrometry (HRMS) analyses were carried out on a Thermo Fisher Q Exactive Mass Spectrometer.
- Melting points were determined on glass slides using a WRX-4 digital display microscopic melting point apparatus and were presented uncorrected.

## 2. Optimization of the reaction conditions

Table S1. Solvent screening <sup>a</sup>

| <div style="text-align: center;"><div><div><div><div>O</div><div>  </div><div>MeO-P-H</div><div>OMe</div></div><div><b>1a</b></div></div><div>+</div><div><div>PhSeCN</div><div><b>2a</b></div></div><div><math>\xrightarrow[\text{solvent, r.t., 5 h}]{5 \text{ mol\% B(C}_6\text{F}_5)_3}</math></div><div><div><div>MeO-P-SePh</div><div>OMe</div></div><div><b>3a</b></div></div></div></div> |                                 |                    |
|---------------------------------------------------------------------------------------------------------------------------------------------------------------------------------------------------------------------------------------------------------------------------------------------------------------------------------------------------------------------------------------------------|---------------------------------|--------------------|
| entry                                                                                                                                                                                                                                                                                                                                                                                             | solvent                         | isolated yield (%) |
| 1                                                                                                                                                                                                                                                                                                                                                                                                 | CH <sub>2</sub> Cl <sub>2</sub> | 85                 |
| 2                                                                                                                                                                                                                                                                                                                                                                                                 | CHCl <sub>3</sub>               | 72                 |
| 3                                                                                                                                                                                                                                                                                                                                                                                                 | DCE                             | 68                 |
| 4                                                                                                                                                                                                                                                                                                                                                                                                 | DMF                             | 30                 |
| 5                                                                                                                                                                                                                                                                                                                                                                                                 | DMSO                            | 23                 |
| 6                                                                                                                                                                                                                                                                                                                                                                                                 | EtOAc                           | 43                 |
| 7                                                                                                                                                                                                                                                                                                                                                                                                 | THF                             | 23                 |
| 8                                                                                                                                                                                                                                                                                                                                                                                                 | acetone                         | 28                 |
| 9                                                                                                                                                                                                                                                                                                                                                                                                 | CH <sub>3</sub> CN              | 37                 |
| 10                                                                                                                                                                                                                                                                                                                                                                                                | Toluene                         | 65                 |

<sup>a</sup> Reaction conditions: **1a** (0.25 mmol, 1.0 equiv.), **2a** (0.25 mmol, 1.0 equiv.), B(C<sub>6</sub>F<sub>5</sub>)<sub>3</sub> (0.0125 mmol, 0.05 equiv.), solvent (2 mL), r.t., N<sub>2</sub>, 5 h.

**Table S2.** Reaction times and amount of B(C<sub>6</sub>F<sub>5</sub>)<sub>3</sub> screening <sup>a</sup>

$$\text{MeO}-\text{P}(=\text{O})(\text{OMe})-\text{H} + \text{PhSeCN} \xrightarrow[\text{CH}_2\text{Cl}_2, \text{ r.t.}]{\text{X mol\% B(C}_6\text{F}_5)_3} \text{MeO}-\text{P}(=\text{O})(\text{OMe})-\text{SePh}$$
  
**1a**                      **2a**                      **3a**

| entry | X (mol%) | T (h) | isolated yield (%) |
|-------|----------|-------|--------------------|
| 1     | 5        | 5     | 85                 |
| 2     | 2        | 5     | 39                 |
| 3     | 2        | 10    | 70                 |
| 4     | 0        | 5     | 32                 |
| 5     | 0        | 10    | 47                 |

<sup>a</sup> Reaction conditions: **1a** (0.25 mmol, 1.0 equiv.), **2a** (0.25 mmol, 1.0 equiv.), B(C<sub>6</sub>F<sub>5</sub>)<sub>3</sub>, CH<sub>2</sub>Cl<sub>2</sub> (2 mL), r.t., N<sub>2</sub>.

### 3. Mechanistic studies

#### 1) IR spectroscopy studies

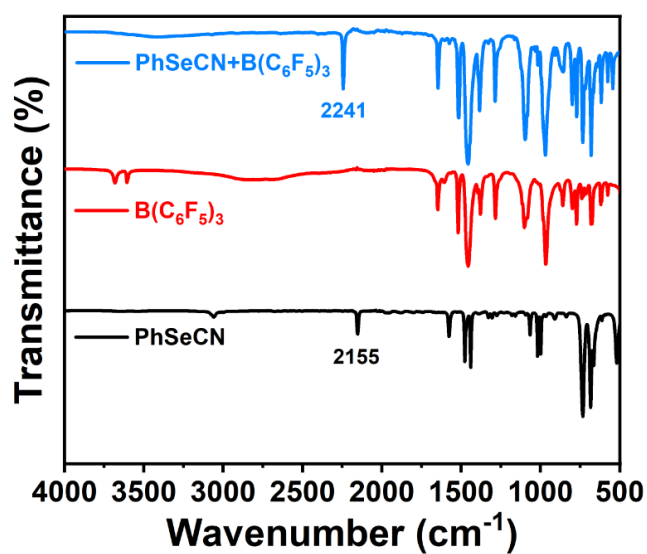

**Figure S1.** IR spectra of PhSeCN (black), B(C<sub>6</sub>F<sub>5</sub>)<sub>3</sub> (red) and a mixture of PhSeCN and B(C<sub>6</sub>F<sub>5</sub>)<sub>3</sub> (blue).

## 2) NMR studies

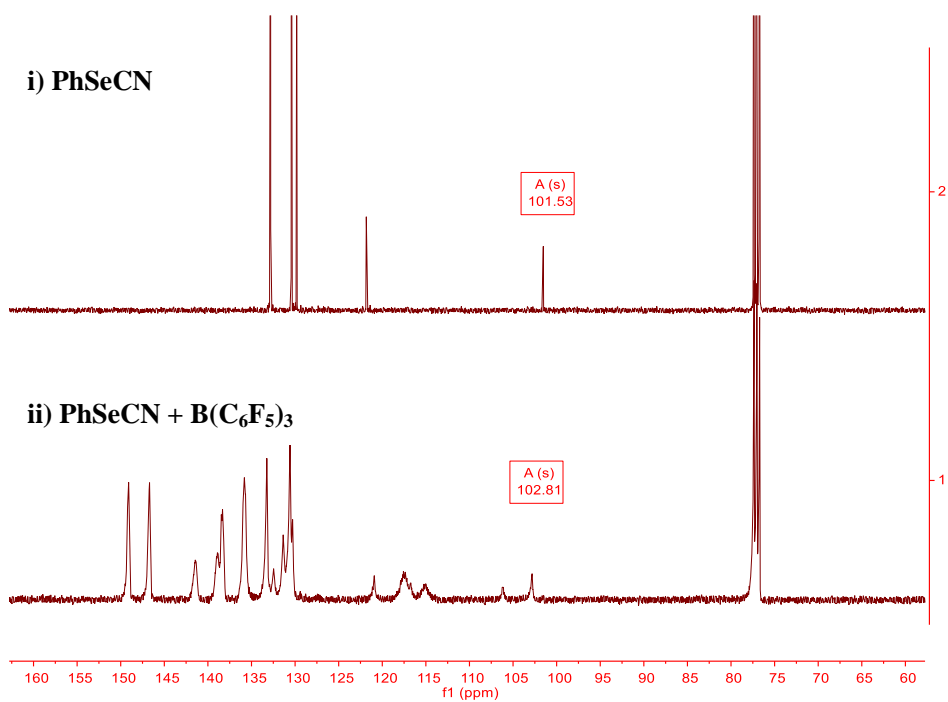

**Figure S2.**  $^{13}\text{C}\{^1\text{H}\}$  NMR spectra in  $\text{CDCl}_3$ : i) PhSeCN, ii) A mixture of PhSeCN and  $\text{B}(\text{C}_6\text{F}_5)_3$  (1:1).

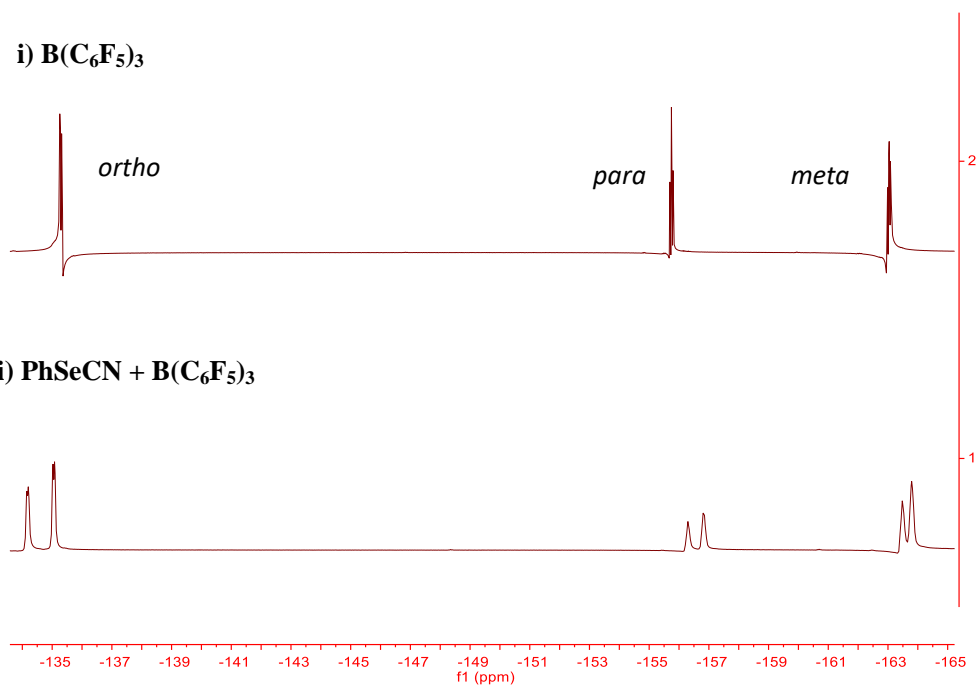

**Figure S3:**  $^{19}\text{F}$  NMR spectra in  $\text{CDCl}_3$ : i)  $\text{B}(\text{C}_6\text{F}_5)_3$ , ii) A mixture of PhSeCN and  $\text{B}(\text{C}_6\text{F}_5)_3$  (1:1).

## 3) HCN generation detection



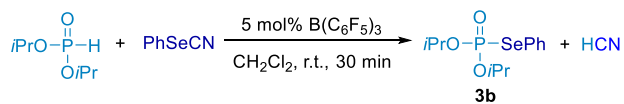

Considering reaction pathway (Scheme 8 in the manuscript), the resulting hydrogen cyanide (HCN) would be produced during the reaction. To confirm this assumption, additional NMR studies were conducted. After running the reaction in an NMR tube at room temperature for 30 minutes, NMR spectroscopy is recorded. As expected, the generation of HCN was clearly detected by NMR.

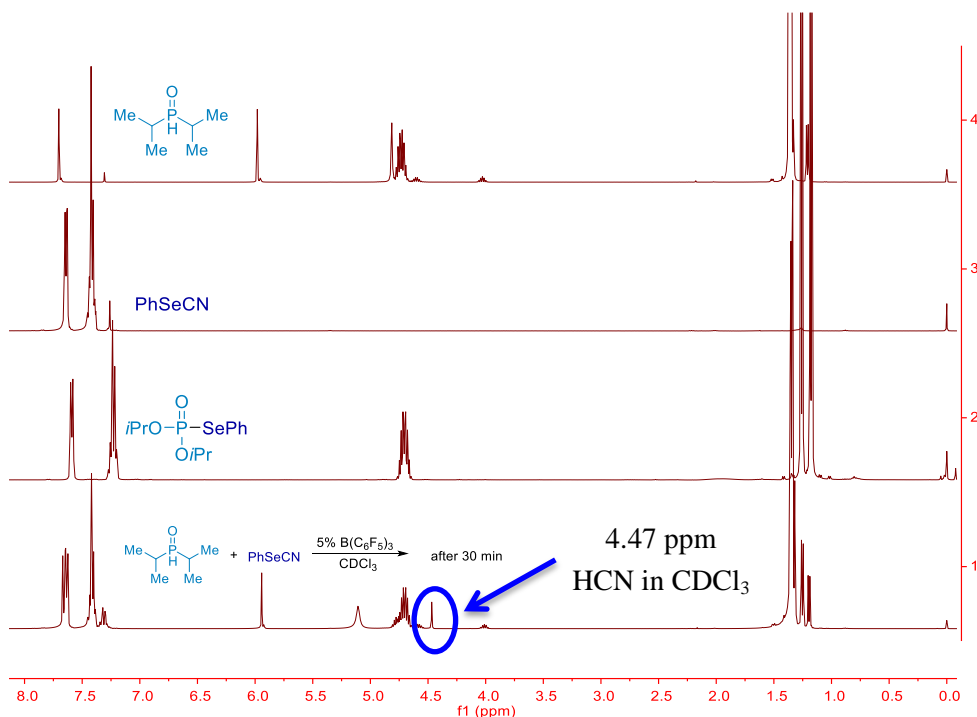

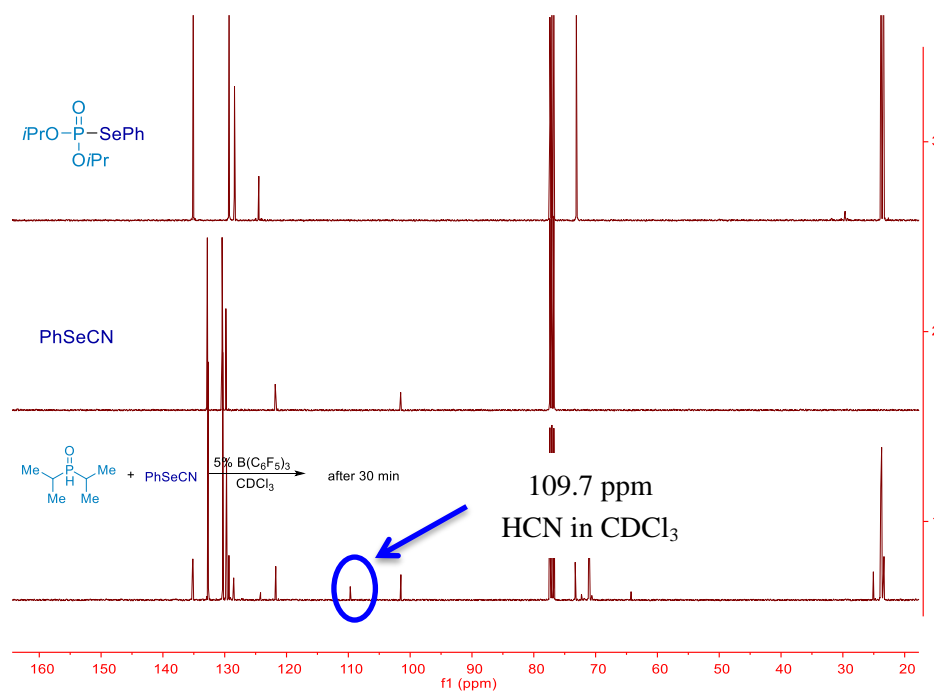

#### 4. General procedure for the synthesis of phosphoroselenoates

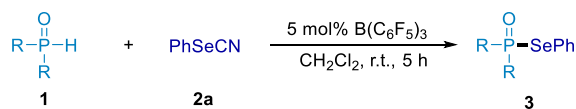

To a 20 mL round-bottom flask were added phosphonate (0.25 mmol), PhSeCN (0.25 mmol), B(C<sub>6</sub>F<sub>5</sub>)<sub>3</sub> (0.0125 mmol) and CH<sub>2</sub>Cl<sub>2</sub> (2 mL) under N<sub>2</sub> atmosphere. This reaction mixture was allowed to stir for 5 h at room temperature. Then, the solvent was removed with a rotary evaporator. The pure product was obtained by flash chromatography on silica gel using petroleum ether and ethyl acetate as the eluent.

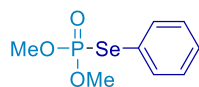

**O,O-Dimethyl Se-phenyl phosphoroselenoate (3a).** Compound **3a** was prepared according to the general procedure and isolated as an oil (56 mg, 85% yield) after flash chromatography (petroleum ether/ethyl acetate = 4/1).

**$^1\text{H}$  NMR** (400 MHz, CDCl<sub>3</sub>)  $\delta$ /ppm = 7.56 (d,  $J$  = 6.7 Hz, 2H), 7.44 – 6.97 (m, 3H), 3.73 (s, 3H), 3.69 (s, 3H).

**$^{13}\text{C}$  NMR** (100 MHz, CDCl<sub>3</sub>)  $\delta$ /ppm = 134.6 (d,  $J_{\text{C-P}}$  = 4.7 Hz), 128.6 (d,  $J_{\text{C-P}}$  = 2.2 Hz), 127.9 (d,  $J_{\text{C-P}}$  = 2.7 Hz), 122.2 (d,  $J_{\text{C-P}}$  = 8.5 Hz), 53.0 (d,  $J_{\text{C-P}}$  = 5.7 Hz).

**$^{31}\text{P}$  NMR** (162 MHz, CDCl<sub>3</sub>)  $\delta$ /ppm = 21.8.

Spectral data are in good agreement with literature values.<sup>1</sup>

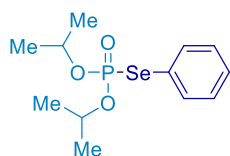

***O,O*-Diisopropyl *Se*-phenyl phosphoroselenoate (3b).** Compound **3b** was prepared according to the general procedure and isolated as an oil (66 mg, 82% yield) after flash chromatography (petroleum ether/ethyl acetate = 5/1).

**<sup>1</sup>H NMR** (400 MHz, CDCl<sub>3</sub>) δ/ppm = 7.59 (d, *J* = 8.1 Hz, 2H), 7.33 – 7.17 (m, 3H), 4.89 – 4.57 (m, 2H), 1.26 (d, *J* = 6.2 Hz, 6H), 1.18 (d, *J* = 6.2 Hz, 6H).

**<sup>13</sup>C NMR** (100 MHz, CDCl<sub>3</sub>) δ/ppm = 134.1 (d, *J*<sub>C-P</sub> = 5.0 Hz), 128.3 (d, *J*<sub>C-P</sub> = 1.9 Hz), 127.5 (d, *J*<sub>C-P</sub> = 2.5 Hz), 123.5 (d, *J*<sub>C-P</sub> = 8.3 Hz), 72.1 (d, *J*<sub>C-P</sub> = 6.6 Hz), 22.9 (d, *J*<sub>C-P</sub> = 3.8 Hz), 22.5 (d, *J*<sub>C-P</sub> = 5.9 Hz).

**<sup>31</sup>P NMR** (162 MHz, CDCl<sub>3</sub>) δ/ppm = 14.7.

Spectral data are in good agreement with literature values.<sup>1</sup>

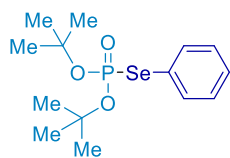

***O,O*-Di-*tert*-butyl *Se*-phenyl phosphoroselenoate (3c).** Compound **3c** was prepared according to the general procedure and isolated as an oil (70 mg, 80% yield) after flash chromatography (petroleum ether/ethyl acetate = 3/1).

**<sup>1</sup>H NMR** (400 MHz, CDCl<sub>3</sub>) δ/ppm = 7.62 (d, *J* = 8.0 Hz, 2H), 7.46 – 7.02 (m, 3H), 1.39 (s, 18H).

**<sup>13</sup>C NMR** (100 MHz, CDCl<sub>3</sub>) δ/ppm = 134.7 (d, *J*<sub>C-P</sub> = 4.7 Hz), 128.0 (d, *J*<sub>C-P</sub> = 2.2 Hz), 127.2 (d, *J*<sub>C-P</sub> = 2.7 Hz), 124.9 (d, *J*<sub>C-P</sub> = 8.9 Hz), 84.4 (d, *J*<sub>C-P</sub> = 10.4 Hz), 29.2 (d, *J*<sub>C-P</sub> = 4.4 Hz).

**<sup>31</sup>P NMR** (162 MHz, CDCl<sub>3</sub>) δ/ppm = 5.0.

Spectral data are in good agreement with literature values.<sup>2</sup>

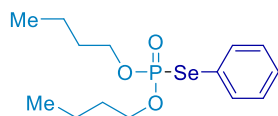

***O,O*-Dibutyl *Se*-phenyl phosphoroselenoate (3d).** Compound **3d** was prepared according to the general procedure and isolated as an oil (79 mg, 91% yield) after flash chromatography (petroleum ether/ethyl acetate = 5/1).

**<sup>1</sup>H NMR** (400 MHz, CDCl<sub>3</sub>) δ/ppm = 7.57 (d, *J* = 8.4 Hz, 2H), 7.40 – 7.07 (m, 3H), 4.31 – 3.78 (m, 4H), 1.55 (dq, *J* = 8.2, 6.6 Hz, 4H), 1.38 – 1.21 (m, 4H), 0.82 (t, *J* = 7.4 Hz, 6H).

**<sup>13</sup>C NMR** (100 MHz, CDCl<sub>3</sub>) δ/ppm = 134.5 (d, *J*<sub>C-P</sub> = 4.7 Hz), 128.4 (d, *J*<sub>C-P</sub> = 2.1 Hz), 127.7 (d, *J*<sub>C-P</sub> = 2.5 Hz), 122.8 (d, *J*<sub>C-P</sub> = 8.3 Hz), 66.5 (d, *J*<sub>C-P</sub> = 6.5 Hz), 31.0 (d, *J*<sub>C-P</sub> = 7.3 Hz), 17.7, 12.5.

**<sup>31</sup>P NMR** (162 MHz, CDCl<sub>3</sub>) δ/ppm = 18.0.

Spectral data are in good agreement with literature values.<sup>1</sup>

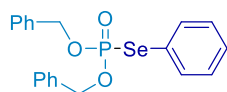

***O,O*-Dibenzyl *Se*-phenyl phosphoroselenoate (3e).** Compound **3e** was prepared according to the general procedure and isolated as an oil (85 mg, 81% yield) after flash chromatography (petroleum ether/ethyl acetate = 3/1).

**<sup>1</sup>H NMR** (400 MHz, CDCl<sub>3</sub>) δ/ppm = 7.48 (d, *J* = 8.1 Hz, 2H), 7.30 – 7.21 (m, 7H), 7.21 – 7.11 (m, 6H), 5.07 – 4.98 (m, 4H).

**<sup>13</sup>C NMR** (100 MHz, CDCl<sub>3</sub>) δ/ppm = 134.8 (d, *J*<sub>C-P</sub> = 4.7 Hz), 134.2 (d, *J*<sub>C-P</sub> = 7.8 Hz), 128.5 (d, *J*<sub>C-P</sub> = 2.2 Hz), 127.9 (d, *J*<sub>C-P</sub> = 2.7 Hz), 127.52, 127.50, 127.0, 122.2 (d, *J*<sub>C-P</sub> = 8.6 Hz), 68.1 (d, *J*<sub>C-P</sub> = 6.1 Hz).

**<sup>31</sup>P NMR** (162 MHz, CDCl<sub>3</sub>) δ/ppm = 18.5.

Spectral data are in good agreement with literature values.<sup>1</sup>

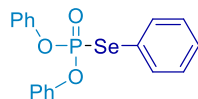

***O,O,Se*-Triphenyl phosphoroselenoate (3f).** Compound **3f** was prepared according to the general procedure and isolated as an oil (75 mg, 77% yield) after flash chromatography (petroleum ether/ethyl acetate = 5/1).

**<sup>1</sup>H NMR** (400 MHz, CDCl<sub>3</sub>) δ/ppm = 7.55 – 7.37 (m, 2H), 7.33 – 7.14 (m, 7H), 7.15 – 7.07 (m, 6H).

**<sup>13</sup>C NMR** (100 MHz, CDCl<sub>3</sub>) δ/ppm = 149.2 (d, *J*<sub>C-P</sub> = 8.6 Hz), 135.2 (d, *J*<sub>C-P</sub> = 4.8 Hz), 128.7 (d, *J*<sub>C-P</sub> = 1.3 Hz), 128.5 (d, *J*<sub>C-P</sub> = 2.5 Hz), 128.3 (d, *J*<sub>C-P</sub> = 2.9 Hz), 124.6 (d, *J*<sub>C-P</sub> = 1.6 Hz), 121.6 (d, *J*<sub>C-P</sub> = 9.1 Hz), 119.6 (d, *J*<sub>C-P</sub> = 5.1 Hz).

**<sup>31</sup>P NMR** (162 MHz, CDCl<sub>3</sub>) δ/ppm = 9.5.

Spectral data are in good agreement with literature values.<sup>1</sup>

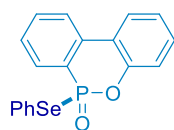

**6-(Phenylselanyl)dibenzo[*c,e*][1,2]oxaphosphinine 6-oxide (3g).** Compound **3g** was prepared according to the general procedure and isolated as an oil (70 mg, 75% yield) after flash chromatography (petroleum ether/ethyl acetate = 5/1).

**<sup>1</sup>H NMR** (400 MHz, CDCl<sub>3</sub>) δ/ppm = 7.80 (ddd *J* = 14.9, 7.7 Hz, 1H), 7.69 (dd, *J* = 8.1, 6.5 Hz, 1H), 7.60 – 7.49 (m, 2H), 7.39 (tdd, *J* = 7.5, 3.6, 1.0 Hz, 1H), 7.31 – 7.20 (m, 1H), 7.17 (dq, *J* = 8.2, 2.1 Hz, 2H), 7.12 – 7.02 (m, 3H), 6.92 (t, *J* = 7.6 Hz, 2H).

**<sup>13</sup>C NMR** (100 MHz, CDCl<sub>3</sub>) δ/ppm = 149.3 (d, *J*<sub>C-P</sub> = 9.8 Hz), 135.9 (d, *J*<sub>C-P</sub> = 3.7 Hz), 134.9 (d, *J*<sub>C-P</sub> = 7.5 Hz), 132.7 (d, *J*<sub>C-P</sub> = 2.7 Hz), 129.5 (t, *J*<sub>C-P</sub> = 5.5 Hz), 128.0 (dd, *J*<sub>C-P</sub> = 5.2, 2.7 Hz), 127.4 (d, *J*<sub>C-P</sub> = 15.0 Hz), 125.6, 124.4, 123.9, 123.9, 123.7,

122.2 (d,  $J = 11.2$  Hz), 120.9 (d,  $J_{\text{C-P}} = 7.1$  Hz), 120.8 (d,  $J_{\text{C-P}} = 11.7$  Hz), 119.0 (d,  $J_{\text{C-P}} = 7.0$  Hz).

$^{31}\text{P}$  NMR (162 MHz,  $\text{CDCl}_3$ )  $\delta/\text{ppm} = 31.4$ .

Spectral data are in good agreement with literature values.<sup>3</sup>

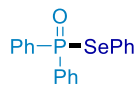

**Se-Phenyl diphenylphosphinoselenoate (3h).** Compound **3h** was prepared according to the general procedure and isolated as an oil (70 mg, 78% yield) after flash chromatography (petroleum ether/ethyl acetate = 4/1).

$^1\text{H}$  NMR (400 MHz,  $\text{CDCl}_3$ )  $\delta/\text{ppm} = 7.87 - 7.64$  (m, 4H), 7.51 – 7.26 (m, 8H), 7.16 (t,  $J = 8.0$  Hz, 1H), 7.07 (t,  $J = 7.5$  Hz, 2H).

$^{13}\text{C}$  NMR (100 MHz,  $\text{CDCl}_3$ )  $\delta/\text{ppm} = 136.3$  (d,  $J_{\text{C-P}} = 3.3$  Hz), 133.9, 133.0, 132.3 (d,  $J_{\text{C-P}} = 3.3$  Hz), 131.4 (d,  $J_{\text{C-P}} = 10.6$  Hz), 129.3 (d,  $J_{\text{C-P}} = 1.7$  Hz), 128.5 (d,  $J_{\text{C-P}} = 13.2$  Hz), 123.7 (d,  $J_{\text{C-P}} = 15.7$  Hz)..

$^{31}\text{P}$  NMR (162 MHz,  $\text{CDCl}_3$ )  $\delta/\text{ppm} = 40.0$ .

Spectral data are in good agreement with literature values.<sup>1</sup>

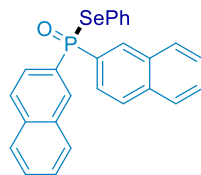

**Se-Phenyl di(naphthalen-2-yl)phosphinoselenoate (3i).** Compound **3i** was prepared according to the general procedure and isolated as a solid (83 mg, 73% yield) after flash chromatography (petroleum ether/ethyl acetate = 2/1). Mp= 230 – 231 °C.

$^1\text{H}$  NMR (400 MHz,  $\text{CDCl}_3$ )  $\delta/\text{ppm} = 8.39 - 8.31$  (m, 2H), 7.90 – 7.73 (m, 6H), 7.53 – 7.43 (m, 7H), 7.20 – 7.01 (m, 4H).

$^{13}\text{C}$  NMR (100 MHz,  $\text{CDCl}_3$ )  $\delta/\text{ppm} = 136.4$  (d,  $J = 3.3$  Hz), 134.8 (d,  $J = 2.7$  Hz), 133.6 (d,  $J = 9.6$  Hz), 132.4 (d,  $J = 14.4$  Hz), 131.5, 130.9 (d,  $J = 5.8$  Hz), 129.3 (d,  $J = 1.7$  Hz), 129.2, 128.5, 128.4, 127.8, 127.7, 127.1, 126.1 (d,  $J = 12.0$  Hz).

$^{31}\text{P}$  NMR (162 MHz,  $\text{CDCl}_3$ )  $\delta/\text{ppm} = 40.0$ .

Spectral data are in good agreement with literature values.<sup>4</sup>

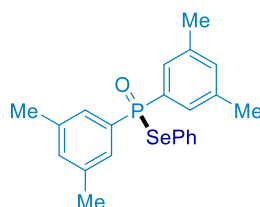

**Se-Phenyl bis(3,5-dimethylphenyl)phosphinoselenoate (3j).** Compound **3j** was prepared according to the general procedure and isolated as a solid (74 mg, 72% yield) after flash chromatography (petroleum ether/ethyl acetate = 3/1). Mp= 262 – 263 °C.

$^1\text{H}$  NMR (400 MHz,  $\text{CDCl}_3$ )  $\delta/\text{ppm} = 7.56 - 7.47$  (m, 1H), 7.42 (d,  $J = 8.3$  Hz, 2H),

7.38 – 7.27 (m, 4H), 7.22 – 7.14 (m, 2H), 7.09 (dd,  $J = 8.3, 6.7$  Hz, 1H), 7.02 (s, 1H), 2.23 (s, 12H).

$^{13}\text{C}$  NMR (100 MHz,  $\text{CDCl}_3$ )  $\delta/\text{ppm} = 138.2$  (d,  $J_{\text{C-P}} = 13.9$  Hz), 136.4 (d,  $J_{\text{C-P}} = 3.2$  Hz), 134.0 (d,  $J_{\text{C-P}} = 3.3$  Hz), 133.2 (d,  $J_{\text{C-P}} = 96.0$  Hz), 131.5, 129.2 (d,  $J_{\text{C-P}} = 2.3$  Hz), 128.9 (d,  $J_{\text{C-P}} = 10.5$  Hz), 124.2 (d,  $J_{\text{C-P}} = 5.6$  Hz), 21.3.

$^{31}\text{P}$  NMR (162 MHz,  $\text{CDCl}_3$ )  $\delta/\text{ppm} = 41.5$ .

Spectral data are in good agreement with literature values.<sup>3</sup>

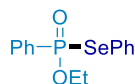

***O*-Ethyl *Se*-phenyl phenylphosphonoselenoate (3k).** Compound **3k** was prepared according to the general procedure and isolated as an oil (65 mg, 80% yield) after flash chromatography (petroleum ether/ethyl acetate = 5/1).

$^1\text{H}$  NMR (400 MHz,  $\text{CDCl}_3$ )  $\delta/\text{ppm} = 7.58 - 7.47$  (m, 2H), 7.44 – 7.40 (m, 1H), 7.32 – 7.25 (m, 4H), 7.23 – 7.18 (m, 2H), 7.11 (t,  $J = 7.6$  Hz, 1H), 4.39 – 4.18 (m, 2H), 1.34 (t,  $J = 7.1$  Hz, 3H).

$^{13}\text{C}$  NMR (100 MHz,  $\text{CDCl}_3$ )  $\delta/\text{ppm} = 136.5$  (d,  $J_{\text{C-P}} = 3.6$  Hz), 132.8 (d,  $J_{\text{C-P}} = 138.0$  Hz), 132.5 (d,  $J_{\text{C-P}} = 3.3$  Hz), 131.1 (d,  $J_{\text{C-P}} = 11.0$  Hz), 129.4 (d,  $J_{\text{C-P}} = 2.2$  Hz), 128.8 (d,  $J_{\text{C-P}} = 2.5$  Hz), 128.2 (d,  $J_{\text{C-P}} = 14.9$  Hz), 124.2 (d,  $J_{\text{C-P}} = 6.7$  Hz), 62.6 (d,  $J_{\text{C-P}} = 7.1$  Hz), 16.2 (d,  $J_{\text{C-P}} = 7.1$  Hz).

$^{31}\text{P}$  NMR (162 MHz,  $\text{CDCl}_3$ )  $\delta/\text{ppm} = 36.7$

Spectral data are in good agreement with literature values.<sup>4</sup>

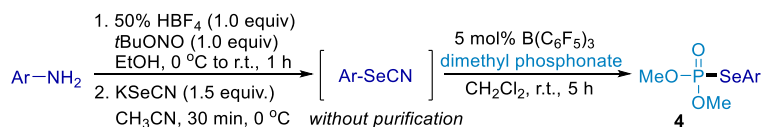

The corresponding aniline (0.25 mmol) was dissolved in ethanol and 50%  $\text{HBF}_4$  (0.25 mmol). The resulting solution was cooled to 0 °C, and 90% solution of tertbutylnitrite (0.25 mmol) was then added dropwise. The mixture was allowed to warm to room temperature with stirring for 1 h. The precipitates were collected by filtration and washed with diethyl ether three times.

The resulting aryl diazonium salt and  $\text{KSeCN}$  (0.375 mmol, 1.5 equiv.) were dissolved in  $\text{CH}_3\text{CN}$ , and the mixture was stirred at 0 °C for 0.5 h under open air conditions. Subsequently, the reaction mixture was poured into water and extracted with dichloromethane three times. The combined organic layers were dried over anhydrous sodium sulfate, and the solvent was removed under reduced pressure to afford the aryl selenocyanates.

Next, the obtained selenocyanates, dimethyl phosphonate (0.25 mmol),  $\text{B}(\text{C}_6\text{F}_5)_3$  (0.0125 mmol) were dissolved in  $\text{CH}_2\text{Cl}_2$  under  $\text{N}_2$  atmosphere. The mixture was stirred at room temperature for 5 h. Purification by column chromatography (petroleum ether/ethyl acetate) afforded the desired product **4**.

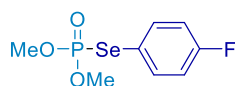

**Se-(4-Fluorophenyl) O,O-dimethyl phosphoroselenoate (4a).** Compound **4a** was prepared according to the general procedure and isolated as an oil (51 mg, 72% yield) after flash chromatography (petroleum ether/ethyl acetate = 2/1).

**$^1\text{H}$  NMR** (400 MHz,  $\text{CDCl}_3$ )  $\delta/\text{ppm}$  = 7.54 (dd,  $J$  = 8.8, 5.2 Hz, 2H), 6.98 – 6.93 (m, 2H), 3.74 (s, 3H), 3.71 (s, 3H).

**$^{13}\text{C}$  NMR** (100 MHz,  $\text{CDCl}_3$ )  $\delta/\text{ppm}$  = 162.3 (dd,  $J_{\text{C-F}}$  = 249.7,  $J_{\text{C-P}}$  = 3.0 Hz), 136.7 (dd,  $J_{\text{C-P}}$  = 8.3,  $J_{\text{C-P}}$  = 4.4 Hz), 116.8 (dd,  $J_{\text{C-F}}$  = 8.7,  $J_{\text{C-P}}$  = 3.5 Hz), 115.9 (dd,  $J_{\text{C-F}}$  = 21.9,  $J_{\text{C-P}}$  = 2.3 Hz), 53.1 (d,  $J_{\text{C-P}}$  = 5.9 Hz).

**$^{19}\text{F}$  NMR** (376 MHz,  $\text{CDCl}_3$ )  $\delta/\text{ppm}$  = -111.7 (d,  $J_{\text{P-F}}$  = 4.8 Hz).

**$^{31}\text{P}$  NMR** (162 MHz,  $\text{CDCl}_3$ )  $\delta/\text{ppm}$  = 21.5 (d,  $J_{\text{P-F}}$  = 4.8 Hz)

Spectral data are in good agreement with literature values.<sup>5</sup>

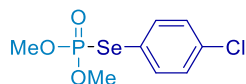

**Se-(4-Chlorophenyl) O,O-dimethyl phosphoroselenoate (4b).** Compound **4b** was prepared according to the general procedure and isolated as an oil (58 mg, 77% yield) after flash chromatography (petroleum ether/ethyl acetate = 3/1).

**$^1\text{H}$  NMR** (400 MHz,  $\text{CDCl}_3$ )  $\delta/\text{ppm}$  = 7.50 (d,  $J$  = 8.5 Hz, 2H), 7.22 (d,  $J$  = 8.5 Hz, 2H), 3.74 (s, 3H), 3.71 (s, 3H).

**$^{13}\text{C}$  NMR** (100 MHz,  $\text{CDCl}_3$ )  $\delta/\text{ppm}$  = 135.9 (d,  $J_{\text{C-P}}$  = 4.6 Hz), 134.5 (d,  $J_{\text{C-P}}$  = 3.1 Hz), 128.8 (d,  $J_{\text{C-P}}$  = 2.2 Hz), 120.3 (d,  $J_{\text{C-P}}$  = 8.8 Hz), 53.1 (d,  $J_{\text{C-P}}$  = 5.9 Hz).

**$^{31}\text{P}$  NMR** (162 MHz,  $\text{CDCl}_3$ )  $\delta/\text{ppm}$  = 21.2

Spectral data are in good agreement with literature values.<sup>5</sup>

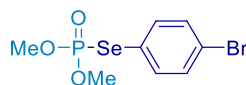

**Se-(4-Bromophenyl) O,O-dimethyl phosphoroselenoate (4c).** Compound **4c** was prepared according to the general procedure and isolated as a solid (69 mg, 80% yield) after flash chromatography (petroleum ether/ethyl acetate = 3/1). Mp= 96 – 97 °C.

**$^1\text{H}$  NMR** (400 MHz,  $\text{CDCl}_3$ )  $\delta/\text{ppm}$  = 7.44 (d,  $J$  = 8.5 Hz, 2H), 7.38 (d,  $J$  = 8.5 Hz, 2H), 3.74 (d,  $J$  = 13.2 Hz, 6H).

**$^{13}\text{C}$  NMR** (100 MHz,  $\text{CDCl}_3$ )  $\delta/\text{ppm}$  = 137.1 (d,  $J_{\text{C-P}}$  = 4.5 Hz), 132.8 (d,  $J_{\text{C-P}}$  = 2.1 Hz), 123.8 (d,  $J_{\text{C-P}}$  = 3.3 Hz), 122.1 (d,  $J_{\text{C-P}}$  = 8.6 Hz), 54.2 (d,  $J_{\text{C-P}}$  = 5.8 Hz).

**$^{31}\text{P}$  NMR** (162 MHz,  $\text{CDCl}_3$ )  $\delta/\text{ppm}$  = 21.1.

Spectral data are in good agreement with literature values.<sup>4</sup>

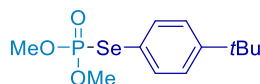

**Se-(4-(*tert*-Butyl)phenyl) *O,O*-dimethyl phosphoroselenoate (4d).** Compound **4d** was prepared according to the general procedure and isolated as an oil (67 mg, 83% yield) after flash chromatography (petroleum ether/ethyl acetate = 1/1).

**<sup>1</sup>H NMR** (400 MHz, CDCl<sub>3</sub>) δ/ppm = 7.47 (dd, *J* = 8.5 Hz, 2H), 7.26 (d, *J* = 8.5 Hz, 2H), 3.75 (s, 3H), 3.71 (s, 3H), 1.23 (s, 9H).

**<sup>13</sup>C NMR** (100 MHz, CDCl<sub>3</sub>) δ/ppm = 151.2 (d, *J*<sub>C-P</sub> = 2.9 Hz), 134.3 (d, *J*<sub>C-P</sub> = 4.4 Hz), 125.8 (d, *J*<sub>C-P</sub> = 2.3 Hz), 118.5 (d, *J*<sub>C-P</sub> = 8.6 Hz), 52.9 (d, *J*<sub>C-P</sub> = 5.6 Hz), 30.2.

**<sup>31</sup>P NMR** (162 MHz, CDCl<sub>3</sub>) δ/ppm = 22.3.

Spectral data are in good agreement with literature values.<sup>2</sup>

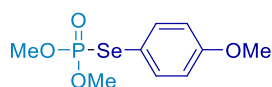

**Se-(4-Methoxyphenyl) *O,O*-dimethyl phosphoroselenoate (4e).** Compound **4e** was prepared according to the general procedure and isolated as an oil (48 mg, 65% yield) after flash chromatography (petroleum ether/ethyl acetate = 2/1).

**<sup>1</sup>H NMR** (400 MHz, CDCl<sub>3</sub>) δ/ppm = 7.46 (d, *J* = 8.8 Hz, 2H), 6.78 (d, *J* = 8.8 Hz, 2H), 3.72 (s, 3H), 3.71 (s, 3H), 3.70 (s, 3H).

**<sup>13</sup>C NMR** (100 MHz, CDCl<sub>3</sub>) δ/ppm = 159.4 (d, *J*<sub>C-P</sub> = 2.8 Hz), 136.3 (d, *J*<sub>C-P</sub> = 4.2 Hz), 114.3 (d, *J*<sub>C-P</sub> = 2.4 Hz), 112.0 (d, *J*<sub>C-P</sub> = 8.7 Hz), 54.3, 52.9 (d, *J*<sub>C-P</sub> = 5.7 Hz).

**<sup>31</sup>P NMR** (162 MHz, CDCl<sub>3</sub>) δ/ppm = 22.2

Spectral data are in good agreement with literature values.<sup>5</sup>

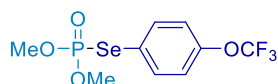

***O,O*-Dimethyl Se-(4-(trifluoromethoxy)phenyl) phosphoroselenoate (4f).**

Compound **4f** was prepared according to the general procedure and isolated as an oil (61 mg, 70% yield) after flash chromatography (petroleum ether/ethyl acetate = 3/1).

**<sup>1</sup>H NMR** (400 MHz, CDCl<sub>3</sub>) δ/ppm = 7.60 (dd, *J* = 8.8 Hz, 2H), 7.10 (d, *J* = 8.8 Hz, 2H), 3.75 (s, 3H), 3.72 (s, 3H).

**<sup>13</sup>C NMR** (100 MHz, CDCl<sub>3</sub>) δ/ppm = 151.32 – 145.90 (m), 136.1 (d, *J*<sub>C-P</sub> = 4.6 Hz), 120.9 (d, *J*<sub>C-P</sub> = 2.1 Hz), 120.4 (d, *J*<sub>C-P</sub> = 8.6 Hz), 119.3 (q, *J*<sub>C-F</sub> = 256.0 Hz), 53.1 (d, *J*<sub>C-P</sub> = 5.9 Hz).

**<sup>19</sup>F NMR** (376 MHz, CDCl<sub>3</sub>) δ/ppm = -57.9.

**<sup>31</sup>P NMR** (162 MHz, CDCl<sub>3</sub>) δ/ppm = 21.0.

**HRMS:** *m/z* [M + H]<sup>+</sup> calcd for C<sub>9</sub>H<sub>11</sub>F<sub>3</sub>O<sub>4</sub>PSe, 350.9507; found, 350.9517.

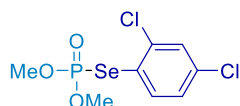



***Se*-(2,4-Dichlorophenyl) *O,O*-dimethyl phosphoroselenoate (4g).** Compound **4g** was prepared according to the general procedure and isolated as a solid (58 mg, 70% yield) after flash chromatography (petroleum ether/ethyl acetate = 8/1). *Mp* = 104 – 105 °C.

**<sup>1</sup>H NMR** (400 MHz, CDCl<sub>3</sub>) δ/ppm = 7.66 (dd, *J* = 8.4, 1.9 Hz, 1H), 7.41 (dd, *J* = 2.3, 0.8 Hz, 1H), 7.14 (dd, *J* = 8.5, 2.3 Hz, 1H), 3.77 (d, *J* = 13.3 Hz, 6H).

**<sup>13</sup>C NMR** (100 MHz, CDCl<sub>3</sub>) δ/ppm = 138.7 (d, *J* = 6.3 Hz), 138.2 (d, *J*<sub>C-P</sub> = 3.5 Hz), 136.0 (d, *J*<sub>C-P</sub> = 2.7 Hz), 129.9 (d, *J*<sub>C-P</sub> = 2.1 Hz), 128.1 (d, *J*<sub>C-P</sub> = 2.0 Hz), 122.8 (d, *J*<sub>C-P</sub> = 8.3 Hz), 54.3 (d, *J*<sub>C-P</sub> = 5.6 Hz).

**<sup>31</sup>P NMR** (162 MHz, CDCl<sub>3</sub>) δ/ppm = 20.3.

**HRMS:** *m/z* [M + H]<sup>+</sup> calcd for C<sub>8</sub>H<sub>10</sub>Cl<sub>2</sub>O<sub>3</sub>PSe, 334.8904; found, 334.8995.

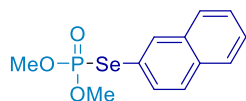

***O,O*-Dimethyl *Se*-(naphthalen-2-yl) phosphoroselenoate (4h).** Compound **4h** was prepared according to the general procedure and isolated as an oil (50 mg, 64% yield) after flash chromatography (petroleum ether/ethyl acetate = 2/1).

**<sup>1</sup>H NMR** (400 MHz, CDCl<sub>3</sub>) δ/ppm = 8.38 (d, *J* = 8.4 Hz, 1H), 8.04 – 7.84 (m, 1H), 7.86 – 7.80 (m, 1H), 7.79 – 7.74 (m, 1H), 7.53 (ddd, *J* = 8.4, 6.8, 1.4 Hz, 1H), 7.45 (ddd, *J* = 8.1, 6.9, 1.2 Hz, 1H), 7.34 (t, *J* = 7.7 Hz, 1H), 3.66 (s, 3H), 3.63 (s, 3H).

**<sup>13</sup>C NMR** (100 MHz, CDCl<sub>3</sub>) δ/ppm = 135.5 (d, *J*<sub>C-P</sub> = 4.9 Hz), 133.9 (d, *J*<sub>C-P</sub> = 3.3 Hz), 133.2 (d, *J*<sub>C-P</sub> = 2.2 Hz), 129.4 (d, *J*<sub>C-P</sub> = 3.2 Hz), 127.7, 126.9, 126.2, 125.5, 124.9 (d, *J*<sub>C-P</sub> = 3.2 Hz), 121.6 (d, *J*<sub>C-P</sub> = 9.4 Hz), 53.1 (d, *J*<sub>C-P</sub> = 6.0 Hz).

**<sup>31</sup>P NMR** (162 MHz, CDCl<sub>3</sub>) δ/ppm = 21.2.

Spectral data are in good agreement with literature values.<sup>1</sup>

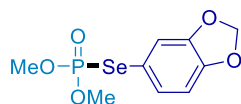

***Se*-(Benzo[*d*][1,3]dioxol-5-yl) *O,O*-dimethyl phosphoroselenoate (4i).** Compound **4i** was prepared according to the general procedure and isolated as an oil (48 mg, 62% yield) after flash chromatography (petroleum ether/ethyl acetate = 2/1).

**<sup>1</sup>H NMR** (400 MHz, CDCl<sub>3</sub>) δ/ppm = 7.21 – 7.02 (m, 2H), 6.77 (d, *J* = 8.0 Hz, 1H), 5.99 (s, 2H), 3.82 (s, 3H), 3.79 (s, 3H).

**<sup>13</sup>C NMR** (100 MHz, CDCl<sub>3</sub>) δ/ppm = 148.8 (d, *J*<sub>C-P</sub> = 3.0 Hz), 148.4 (d, *J*<sub>C-P</sub> = 2.5 Hz), 130.1 (d, *J*<sub>C-P</sub> = 5.3 Hz), 113.9 (d, *J*<sub>C-P</sub> = 9.0 Hz), 109.4 (d, *J*<sub>C-P</sub> = 2.7 Hz), 101.9, 54.0 (d, *J*<sub>C-P</sub> = 5.7 Hz).

**<sup>31</sup>P NMR** (162 MHz, CDCl<sub>3</sub>) δ/ppm = 22.2.

Spectral data are in good agreement with literature values.<sup>2</sup>

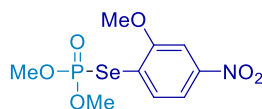

***Se*-(2-Methoxy-4-nitrophenyl) *O,O*-dimethyl phosphoroselenoate (4j).** Compound **4j** was prepared according to the general procedure and isolated as a solid (58 mg, 68% yield) after flash chromatography (petroleum ether/ethyl acetate = 3/1). Mp= 75 – 76 °C.

<sup>1</sup>H NMR (400 MHz, CDCl<sub>3</sub>) δ/ppm = 7.83 (dd, *J* = 8.5, 1.5 Hz, 1H), 7.72 (dd, *J* = 8.6, 2.3 Hz, 1H), 7.68 – 7.60 (m, 1H), 3.93 (s, 3H), 3.77 (d, *J* = 13.4 Hz, 6H).

<sup>13</sup>C NMR (100 MHz, CDCl<sub>3</sub>) δ/ppm = 158.4 (d, *J* = 5.1 Hz), 148.9 (d, *J* = 1.9 Hz), 135.1 (d, *J* = 4.2 Hz), 123.2 (d, *J* = 7.4 Hz), 116.5 (d, *J* = 1.5 Hz), 105.4 (d, *J* = 1.4 Hz), 56.6, 54.3 (d, *J* = 5.5 Hz).

<sup>31</sup>P NMR (162 MHz, CDCl<sub>3</sub>) δ/ppm = 20.2.

HRMS: *m/z* [M + H]<sup>+</sup> calcd for C<sub>9</sub>H<sub>13</sub>NO<sub>6</sub>PSe, 341.9640; found, 341.9636.

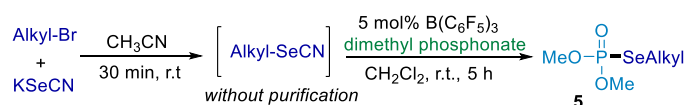

The reaction mixture of alkyl bromides (0.25 mmol) and KSeCN (0.375 mmol, 1.5 equiv.) was stirred in anhydrous CH<sub>3</sub>CN at room temperature for 0.5 h. Subsequently, the reaction mixture was poured into water and extracted with dichloromethane three times. The combined organic layers were dried over anhydrous sodium sulfate, and the solvent was removed under reduced pressure to afford the alkyl selenocyanates. Next, the obtained selenocyanates, dimethyl phosphonate (0.25 mmol), B(C<sub>6</sub>F<sub>5</sub>)<sub>3</sub> (0.0125 mmol) were dissolved in CH<sub>2</sub>Cl<sub>2</sub> under N<sub>2</sub> atmosphere. The mixture was stirred at room temperature for 5 h. Purification by column chromatography (petroleum ether/ethyl acetate) afforded the desired product **5**.

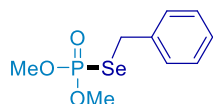

***Se*-Benzyl *O,O*-dimethyl phosphoroselenoate (5a).** Compound **5a** was prepared according to the general procedure and isolated as an oil (50 mg, 72% yield) after flash chromatography (petroleum ether/ethyl acetate = 5/1).

<sup>1</sup>H NMR (400 MHz, CDCl<sub>3</sub>) δ/ppm = 7.30 – 7.15 (m, 5H), 4.00 (d, *J* = 12.9 Hz, 2H), 3.61 (d, *J* = 13.3 Hz, 6H).

<sup>13</sup>C NMR (100 MHz, CDCl<sub>3</sub>) δ/ppm = 138.3 (d, *J*<sub>C-P</sub> = 4.5 Hz), 129.0, 128.7, 127.5, 53.55 (d, *J*<sub>C-P</sub> = 5.3 Hz), 29.4 (d, *J*<sub>C-P</sub> = 4.6 Hz).

<sup>31</sup>P NMR (162 MHz, CDCl<sub>3</sub>) δ/ppm = 24.6.

Spectral data are in good agreement with literature values.<sup>6</sup>

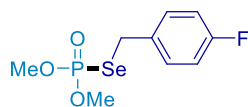

***Se*-(4-Fluorobenzyl) *O,O*-dimethyl phosphoroselenoate (5b).** Compound **5b** was prepared according to the general procedure and isolated as an oil (60 mg, 81% yield)

after flash chromatography (petroleum ether/ethyl acetate = 4/1).

**<sup>1</sup>H NMR** (400 MHz, CDCl<sub>3</sub>) δ/ppm = 7.26 (dd, *J* = 8.6, 5.4 Hz, 2H), 6.97 – 6.85 (m, 2H), 3.98 (d, *J* = 13.3 Hz, 2H), 3.61 (d, *J* = 13.3 Hz, 6H).

**<sup>13</sup>C NMR** (100 MHz, CDCl<sub>3</sub>) δ/ppm = 162.0 (d, *J*<sub>C-F</sub> = 246.7 Hz), 134.95 – 133.69 (m), 130.6 (d, *J*<sub>C-F</sub> = 8.3 Hz), 115.6 (d, *J*<sub>C-F</sub> = 21.6 Hz), 53.6 (d, *J*<sub>C-P</sub> = 5.4 Hz), 28.6 (d, *J*<sub>C-P</sub> = 4.7 Hz).

**<sup>19</sup>F NMR** (376 MHz, CDCl<sub>3</sub>) δ/ppm = 114.5.

**<sup>31</sup>P NMR** (162 MHz, CDCl<sub>3</sub>) δ/ppm = 24.3.

**HRMS:** *m/z* [M + H]<sup>+</sup> calcd for C<sub>9</sub>H<sub>13</sub>FO<sub>3</sub>PSe, 298.9746; found, 298.9752.

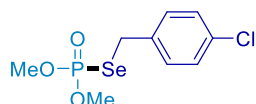

***Se*-(4-Chlorobenzyl) *O,O*-dimethyl phosphoroselenoate (5c).** Compound **5c** was prepared according to the general procedure and isolated as an oil (67 mg, 85% yield) after flash chromatography (petroleum ether/ethyl acetate = 4/1).

**<sup>1</sup>H NMR** (400 MHz, CDCl<sub>3</sub>) δ/ppm = 7.23 (d, *J* = 8.8 Hz, 2H), 7.20 (d, *J* = 8.8 Hz, 2H), 3.97 (d, *J* = 13.4 Hz, 2H), 3.62 (d, *J* = 13.3 Hz, 6H).

**<sup>13</sup>C NMR** (100 MHz, CDCl<sub>3</sub>) δ/ppm = 137.0 (d, *J*<sub>C-P</sub> = 4.2 Hz), 133.3, 130.3, 128.8, 53.6 (d, *J*<sub>C-P</sub> = 5.5 Hz), 28.6 (d, *J*<sub>C-P</sub> = 4.6 Hz).

**<sup>31</sup>P NMR** (162 MHz, CDCl<sub>3</sub>) δ/ppm = 24.1.

**HRMS:** *m/z* [M + H]<sup>+</sup> calcd for C<sub>9</sub>H<sub>13</sub>ClO<sub>3</sub>PSe, 314.9451; found, 314.9441.

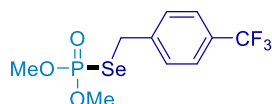

***O,O*-Dimethyl *Se*-(4-(trifluoromethyl)benzyl) phosphoroselenoate (5d).** Compound **5d** was prepared according to the general procedure and isolated as an oil (68 mg, 78% yield) after flash chromatography (petroleum ether/ethyl acetate = 4/1).

**<sup>1</sup>H NMR** (400 MHz, CDCl<sub>3</sub>) δ/ppm = 7.49 (d, *J* = 8.2 Hz, 2H), 7.41 (d, *J* = 8.1 Hz, 2H), 4.02 (d, *J* = 13.8 Hz, 2H), 3.61 (d, *J* = 13.3 Hz, 6H).

**<sup>13</sup>C NMR** (100 MHz, CDCl<sub>3</sub>) δ/ppm = 144.14 – 141.47 (m), 129.4 (q, *J*<sub>C-P</sub> = 44.0 Hz), 129.3, 125.6 (q, *J* = 3.8 Hz), 121.3 (q, *J*<sub>C-F</sub> = 274.0 Hz), 53.6 (d, *J* = 5.6 Hz), 28.4 (d, *J* = 4.7 Hz).

**<sup>19</sup>F NMR** (376 MHz, CDCl<sub>3</sub>) δ/ppm = -62.6.

**<sup>31</sup>P NMR** (162 MHz, CDCl<sub>3</sub>) δ/ppm = 23.7.

**HRMS:** *m/z* [M + H]<sup>+</sup> calcd for C<sub>10</sub>H<sub>13</sub>F<sub>3</sub>O<sub>3</sub>PSe, 348.9714; found, 348.9750.

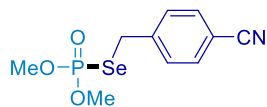

***Se*-(4-Cyanobenzyl) *O,O*-dimethyl phosphoroselenoate (5e).** Compound **5e** was prepared according to the general procedure and isolated as a solid (50 mg, 66% yield)

after flash chromatography (petroleum ether/ethyl acetate = 3/1). Mp= 62 – 63 °C.

**<sup>1</sup>H NMR** (400 MHz, CDCl<sub>3</sub>) δ/ppm = 7.54 (d, *J* = 8.0 Hz, 2H), 7.42 (d, *J* = 8.0 Hz, 2H), 4.01 (d, *J* = 14.2 Hz, 2H), 3.61 (d, *J* = 13.3 Hz, 6H).

**<sup>13</sup>C NMR** (100 MHz, CDCl<sub>3</sub>) δ/ppm = 144.3 (d, *J*<sub>C-P</sub> = 3.7 Hz), 132.4, 129.7, 118.6, 111.1, 53.7 (d, *J*<sub>C-P</sub> = 5.6 Hz), 28.5 (d, *J*<sub>C-P</sub> = 4.7 Hz).

**<sup>31</sup>P NMR** (162 MHz, CDCl<sub>3</sub>) δ/ppm = 23.3.

**HRMS:** *m/z* [M + H]<sup>+</sup> calcd for C<sub>10</sub>H<sub>13</sub>NO<sub>3</sub>PSe, 305.9793; found, 305.9779.

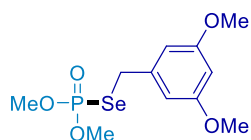

***Se*-(3,5-Dimethoxybenzyl) *O,O*-dimethyl phosphoroselenoate (5f).** Compound **5f** was prepared according to the general procedure and isolated as an oil (53 mg, 63% yield) after flash chromatography (petroleum ether/ethyl acetate = 3/1).

**<sup>1</sup>H NMR** (400 MHz, CDCl<sub>3</sub>) δ/ppm = 6.43 (d, *J* = 2.3 Hz, 2H), 6.27 (t, *J* = 2.3 Hz, 1H), 3.94 (d, *J* = 12.6 Hz, 2H), 3.71 (s, 6H), 3.65 (d, *J* = 13.3 Hz, 6H).

**<sup>13</sup>C NMR** (100 MHz, CDCl<sub>3</sub>) δ/ppm = 160.9, 140.4 (d, *J*<sub>C-P</sub> = 4.9 Hz), 106.8, 99.6, 55.4, 53.6 (d, *J*<sub>C-P</sub> = 5.3 Hz), 29.6 (d, *J*<sub>C-P</sub> = 4.6 Hz).

**<sup>31</sup>P NMR** (162 MHz, CDCl<sub>3</sub>) δ/ppm = 24.7.

**HRMS:** *m/z* [M + H]<sup>+</sup> calcd for C<sub>11</sub>H<sub>18</sub>O<sub>5</sub>PSe, 341.0052; found, 341.0039.

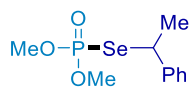

***O,O*-Dimethyl *Se*-(1-phenylethyl) phosphoroselenoate (5g).** Compound **5g** was prepared according to the general procedure and isolated as an oil (45 mg, 61% yield) after flash chromatography (petroleum ether/ethyl acetate = 4/1).

**<sup>1</sup>H NMR** (400 MHz, CDCl<sub>3</sub>) δ/ppm = 7.35 – 7.30 (m, 2H), 7.25 (t, *J* = 7.6 Hz, 2H), 7.22 – 7.14 (m, 1H), 4.83 – 4.45 (m, 1H), 3.57 (dd, *J* = 13.3, 3.2 Hz, 6H), 1.84 (d, *J* = 7.2 Hz, 3H).

**<sup>13</sup>C NMR** (100 MHz, CDCl<sub>3</sub>) δ/ppm = 143.6 (d, *J*<sub>C-P</sub> = 5.4 Hz), 128.6, 127.6, 127.1, 53.5 (dd, *J*<sub>C-P</sub> = 5.4, 3.4 Hz), 42.9 (d, *J*<sub>C-P</sub> = 4.3 Hz), 24.3 (d, *J*<sub>C-P</sub> = 5.9 Hz).

**<sup>31</sup>P NMR** (162 MHz, CDCl<sub>3</sub>) δ/ppm = 24.6.

**HRMS:** *m/z* [M + H]<sup>+</sup> calcd for C<sub>10</sub>H<sub>16</sub>O<sub>3</sub>PSe, 294.9997; found, 294.9985.

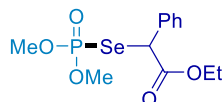

**Ethyl 2-((Dimethoxyphosphoryl)selanyl)-2-phenylacetate (5h).** Compound **5h** was prepared according to the general procedure and isolated as an oil (57 mg, 65% yield) after flash chromatography (petroleum ether/ethyl acetate = 3/1).

**<sup>1</sup>H NMR** (400 MHz, CDCl<sub>3</sub>) δ/ppm = 7.47 – 7.39 (m, 2H), 7.31 – 7.19 (m, 3H), 4.96

(d,  $J = 10.0$  Hz, 1H), 4.28 – 4.00 (m, 2H), 3.56 (dd,  $J = 13.4, 5.2$  Hz, 6H), 1.19 (t,  $J = 7.2$  Hz, 3H).

$^{13}\text{C}$  NMR (100 MHz,  $\text{CDCl}_3$ )  $\delta/\text{ppm} = 170.2$  (d,  $J_{\text{C-P}} = 6.2$  Hz), 136.6 (d,  $J_{\text{C-P}} = 3.9$  Hz), 128.8, 128.6, 128.5, 62.4, 53.7 (t,  $J_{\text{C-P}} = 4.7$  Hz), 46.9 (d,  $J_{\text{C-P}} = 3.8$  Hz), 14.0.

$^{31}\text{P}$  NMR (162 MHz,  $\text{CDCl}_3$ )  $\delta/\text{ppm} = 23.1$ .

HRMS:  $m/z$   $[\text{M} + \text{H}]^+$  calcd for  $\text{C}_{12}\text{H}_{18}\text{O}_5\text{PSe}$ , 353.0052; found, 353.0044.

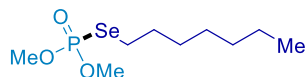

**Se-Heptyl *O,O*-dimethyl phosphoroselenoate (5i).** Compound **5i** was prepared according to the general procedure and isolated as an oil (42 mg, 58% yield) after flash chromatography (petroleum ether/ethyl acetate = 3/1).

$^1\text{H}$  NMR (400 MHz,  $\text{CDCl}_3$ )  $\delta/\text{ppm} = 3.73$  (s, 3H), 3.70 (s, 3H), 2.80 (dt,  $J = 14.1, 7.4$  Hz, 2H), 1.75 – 1.58 (m, 2H), 1.40 – 1.12 (m, 8H), 0.81 (t,  $J = 6.5$  Hz, 3H).

$^{13}\text{C}$  NMR (100 MHz,  $\text{CDCl}_3$ )  $\delta/\text{ppm} = 52.5$  (d,  $J_{\text{C-P}} = 5.6$  Hz), 30.6, 30.2 (d,  $J_{\text{C-P}} = 4.5$  Hz), 28.5, 27.6, 25.6 (d,  $J_{\text{C-P}} = 4.6$  Hz), 21.5, 13.0.

$^{31}\text{P}$  NMR (162 MHz,  $\text{CDCl}_3$ )  $\delta/\text{ppm} = 25.4$ .

HRMS:  $m/z$   $[\text{M} + \text{H}]^+$  calcd for  $\text{C}_9\text{H}_{22}\text{O}_3\text{PSe}$ , 289.0466; found, 289.0479.

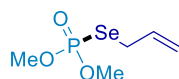

**Se-Allyl *O,O*-dimethyl phosphoroselenoate (5j).** Compound **5j** was prepared according to the general procedure and isolated as an oil (31 mg, 55% yield) after flash chromatography (petroleum ether/ethyl acetate = 3/1).

$^1\text{H}$  NMR (400 MHz,  $\text{CDCl}_3$ )  $\delta/\text{ppm} = 5.91$  (ddt,  $J = 17.1, 9.3, 7.6$  Hz, 1H), 5.18 (d,  $J = 16.9$  Hz, 1H), 5.02 (d,  $J = 9.9$  Hz, 1H), 3.74 (d,  $J = 1.2$  Hz, 6H), 3.43 (dd,  $J = 13.7, 7.6$  Hz, 2H).

$^{13}\text{C}$  NMR (100 MHz,  $\text{CDCl}_3$ )  $\delta/\text{ppm} = 134.3$  (d,  $J_{\text{C-P}} = 4.3$  Hz), 118.1, 53.6 (d,  $J_{\text{C-P}} = 5.5$  Hz), 28.2 (d,  $J_{\text{C-P}} = 4.5$  Hz).

$^{31}\text{P}$  NMR (162 MHz,  $\text{CDCl}_3$ )  $\delta/\text{ppm} = 24.6$ .

HRMS:  $m/z$   $[\text{M} + \text{H}]^+$  calcd for  $\text{C}_5\text{H}_{12}\text{O}_3\text{PSe}$ , 230.9684; found, 230.9655.

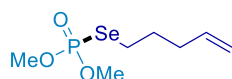

***O,O*-Dimethyl Se-(pent-4-en-1-yl) phosphoroselenoate (5k).** Compound **5k** was prepared according to the general procedure and isolated as an oil (39 mg, 61% yield) after flash chromatography (petroleum ether/ethyl acetate = 1/1).

$^1\text{H}$  NMR (400 MHz,  $\text{CDCl}_3$ )  $\delta/\text{ppm} = 5.70$  (ddt,  $J = 16.9, 10.2, 6.7$  Hz, 1H), 5.05 – 4.64 (m, 2H), 3.72 (d,  $J = 13.2$  Hz, 6H), 2.93 – 2.71 (m, 2H), 2.18 – 2.01 (m, 2H), 1.86 – 1.76 (m, 2H).

$^{13}\text{C}$  NMR (100 MHz,  $\text{CDCl}_3$ )  $\delta/\text{ppm} = 137.0, 115.8, 53.6$  (d,  $J_{\text{C-P}} = 5.6$  Hz), 33.5, 30.3 (d,  $J_{\text{C-P}} = 4.3$  Hz), 25.8 (d,  $J_{\text{C-P}} = 4.7$  Hz).

$^{31}\text{P}$  NMR (162 MHz,  $\text{CDCl}_3$ )  $\delta/\text{ppm} = 25.1$ .

**HRMS:**  $m/z$   $[M + H]^+$  calcd for  $C_7H_{16}O_3PSe$ , 258.9997; found, 258.9991.

## 5. General procedure for the synthesis of 3-selenylindoles

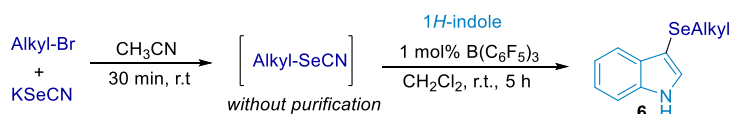

The alkyl selenocyanates were prepared using the aforementioned method. Indole (0.25 mmol), alkyl selenocyanates (0.25 mmol), B(C<sub>6</sub>F<sub>5</sub>)<sub>3</sub> (0.0025 mmol) were dissolved in CH<sub>2</sub>Cl<sub>2</sub> under N<sub>2</sub> atmosphere. This reaction mixture was allowed to stir for 5 h at room temperature. Upon completion, the solvent was removed in vacuum and the residue was purified by column chromatography (silica gel, petroleum ether/ethyl acetate) to afford the corresponding product **6**.

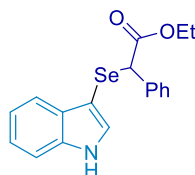

**Ethyl 2-((1H-indol-3-yl)selanyl)-2-phenylacetate (6a).** Compound **6a** was prepared according to the general procedure and isolated as an oil (55 mg, 61% yield) after flash chromatography (petroleum ether/ethyl acetate = 10/1).

**<sup>1</sup>H NMR** (400 MHz, CDCl<sub>3</sub>)  $\delta$ /ppm = 8.45 (s, 1H), 7.53 (d,  $J$  = 7.6 Hz, 1H), 7.32 – 7.27 (m, 2H), 7.24 (d,  $J$  = 7.8 Hz, 1H), 7.16 – 7.05 (m, 5H), 7.01 (d,  $J$  = 2.6 Hz, 1H), 4.66 (s, 1H), 3.92 (p,  $J$  = 7.1 Hz, 2H), 0.97 (t,  $J$  = 7.1 Hz, 3H).

**<sup>13</sup>C NMR** (100 MHz, CDCl<sub>3</sub>)  $\delta$ /ppm = 171.8, 136.8, 136.1, 132.0, 130.3, 128.7, 128.5, 128.4, 127.7, 122.6, 120.7, 120.1, 111.4, 98.9, 61.5, 47.7, 13.9.

**HRMS:**  $m/z$   $[M + H]^+$  calcd for  $C_{18}H_{18}NO_2Se$ , 360.0497; found, 360.0490.

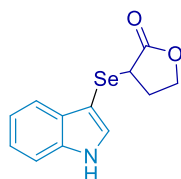

**3-((1H-Indol-3-yl)selanyl)dihydrofuran-2(3H)-one (6b).** Compound **6b** was prepared according to the general procedure and isolated as an oil (41 mg, 58% yield) after flash chromatography (petroleum ether/ethyl acetate = 3/1).

**<sup>1</sup>H NMR** (400 MHz, CDCl<sub>3</sub>)  $\delta$ /ppm = 8.62 (s, 1H), 7.76 – 7.63 (m, 1H), 7.45 – 7.34 (m, 2H), 7.21 – 7.13 (m, 2H), 4.08 (td,  $J$  = 8.7, 3.8 Hz, 1H), 3.89 (td,  $J$  = 8.6, 7.2 Hz, 1H), 3.67 (dd,  $J$  = 8.7, 4.0 Hz, 1H), 2.60 – 2.52 (m, 1H), 2.24 – 2.12 (m, 1H).

**<sup>13</sup>C NMR** (100 MHz, CDCl<sub>3</sub>)  $\delta$ /ppm = 177.0, 136.2, 132.5, 130.4, 123.0, 121.1, 119.7, 111.6, 95.9, 67.0, 35.7, 30.5, 29.7.

**HRMS:**  $m/z$   $[M + H]^+$  calcd for  $C_{12}H_{12}NO_2Se$ , 282.0028; found, 282.0033.

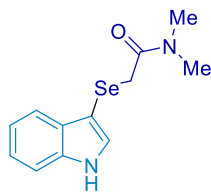

**2-((1*H*-Indol-3-yl)selanyl)-*N,N*-dimethylacetamide (6c).** Compound **6c** was prepared according to the general procedure and isolated as an oil (40 mg, 57% yield) after flash chromatography (petroleum ether/ethyl acetate = 1/1).

**<sup>1</sup>H NMR** (400 MHz, CDCl<sub>3</sub>) δ/ppm = 9.12 (s, 1H), 7.70 – 7.53 (m, 1H), 7.30 – 7.22 (m, 1H), 7.21 – 7.18 (m, 1H), 7.15 – 7.06 (m, 2H), 3.42 (s, 2H), 2.79 (s, 3H), 2.78 (s, 3H).

**<sup>13</sup>C NMR** (100 MHz, CDCl<sub>3</sub>) δ/ppm = 170.5, 136.3, 131.6, 130.1, 122.5, 120.4, 119.7, 111.7, 97.0, 38.2, 35.8, 28.2.

**HRMS:** *m/z* [M + H]<sup>+</sup> calcd for C<sub>12</sub>H<sub>15</sub>N<sub>2</sub>OSe, 283.0344; found, 283.0338.

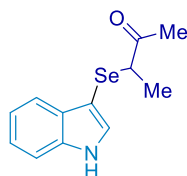

**3-((1*H*-Indol-3-yl)selanyl)butan-2-one (6d).** Compound **6d** was prepared according to the general procedure and isolated as a solid (42 mg, 63% yield) after flash chromatography (petroleum ether/ethyl acetate = 7/1). Mp= 89 – 90 °C.

**<sup>1</sup>H NMR** (400 MHz, CDCl<sub>3</sub>) δ/ppm = 8.71 (s, 1H), 7.61 – 7.57 (m, 1H), 7.24 – 7.15 (m, 1H), 7.13 – 7.05 (m, 3H), 3.59 (q, *J* = 6.9 Hz, 1H), 2.28 (s, 3H), 1.35 (d, *J* = 6.9 Hz, 3H).

**<sup>13</sup>C NMR** (100 MHz, CDCl<sub>3</sub>) δ/ppm = 205.4, 136.2, 131.9, 130.6, 122.7, 120.7, 119.8, 111.6, 96.0, 45.8, 27.6, 16.4.

**HRMS:** *m/z* [M + H]<sup>+</sup> calcd for C<sub>12</sub>H<sub>14</sub>NOSe, 268.0235; found, 268.0219.

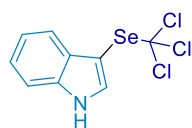

**3-((Trichloromethyl)selanyl)-1*H*-indole (6e).** Compound **6e** was prepared according to the general procedure and isolated as a solid (43 mg, 55% yield) after flash chromatography (petroleum ether/ethyl acetate = 8/1). Mp= 102 – 103 °C.

**<sup>1</sup>H NMR** (400 MHz, CDCl<sub>3</sub>) δ/ppm = 8.77 (s, 1H), 7.74 – 7.55 (m, 1H), 7.35 – 7.22 (m, 2H), 7.21 – 7.11 (m, 2H).

**<sup>13</sup>C NMR** (100 MHz, CDCl<sub>3</sub>) δ/ppm = 136.1, 132.1, 128.7, 123.7, 121.8, 119.4, 112.1, 102.4, 89.0.

**HRMS:** *m/z* [M + H]<sup>+</sup> calcd for C<sub>9</sub>H<sub>7</sub>Cl<sub>3</sub>NSe, 313.8804; found, 313.8816.



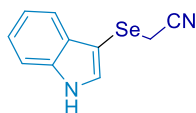

**2-((1H-Indol-3-yl)selanyl)acetonitrile (6f).** Compound **6f** was prepared according to the general procedure and isolated as an oil (31 mg, 53% yield) after flash chromatography (petroleum ether/ethyl acetate = 5/1).

**<sup>1</sup>H NMR** (400 MHz, CDCl<sub>3</sub>) δ/ppm = 8.55 (s, 1H), 7.67 (dd, *J* = 8.2, 1.0 Hz, 1H), 7.49 (d, *J* = 2.6 Hz, 1H), 7.44 – 7.31 (m, 1H), 7.27 – 7.08 (m, 2H), 3.11 (s, 2H).

**<sup>13</sup>C NMR** (100 MHz, CDCl<sub>3</sub>) δ/ppm = 136.3, 132.1, 129.5, 123.2, 121.1, 119.6, 118.2, 111.7, 96.6, 8.2.

**HRMS:** *m/z* [M + H]<sup>+</sup> calcd for C<sub>10</sub>H<sub>9</sub>N<sub>2</sub>Se, 236.9925; found, 236.9916.

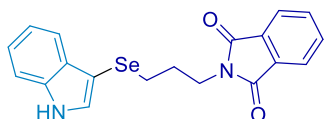

**2-(3-((1H-Indol-3-yl)selanyl)propyl)isoindoline-1,3-dione (6g).** Compound **6g** was prepared according to the general procedure and isolated as a solid (58 mg, 61% yield) after flash chromatography (petroleum ether/ethyl acetate = 8/1). Mp= 95 – 96 °C.

**<sup>1</sup>H NMR** (400 MHz, CDCl<sub>3</sub>) δ/ppm = 8.42 (s, 1H), 7.73 – 7.69 (m, 2H), 7.64 – 7.57 (m, 3H), 7.39 – 7.24 (m, 2H), 7.18 – 7.03 (m, 2H), 3.70 (t, *J* = 7.1 Hz, 2H), 2.58 (t, *J* = 7.2 Hz, 2H), 1.85 (p, *J* = 7.2 Hz, 2H).

**<sup>13</sup>C NMR** (100 MHz, CDCl<sub>3</sub>) δ/ppm = 168.5, 136.3, 134.0, 132.0, 131.0, 130.2, 123.2, 122.6, 120.5, 120.1, 111.3, 97.7, 37.8, 29.0, 24.9.

**HRMS:** *m/z* [M + H]<sup>+</sup> calcd for C<sub>19</sub>H<sub>17</sub>N<sub>2</sub>O<sub>2</sub>Se, 385.0450; found, 385.0444.

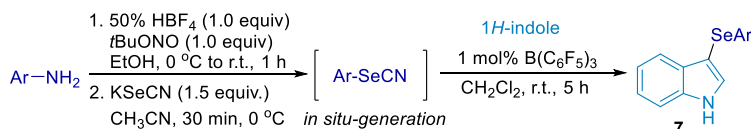

The aryl selenocyanates were prepared using the aforementioned method. Indole (0.25 mmol), aryl selenocyanates (0.25 mmol), B(C<sub>6</sub>F<sub>5</sub>)<sub>3</sub> (0.0025 mmol) were dissolved in CH<sub>2</sub>Cl<sub>2</sub> under N<sub>2</sub> atmosphere. This reaction mixture was allowed to stir for 5 h at room temperature. Upon completion, the solvent was removed in vacuum and the residue was purified by column chromatography (silica gel, petroleum ether/ethyl acetate) to afford the corresponding product **7**.

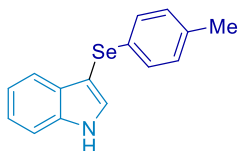

**3-(p-Tolylselanyl)-1H-indole (7a).** Compound **7a** was prepared according to the general procedure and isolated as a solid (52 mg, 73% yield) after flash chromatography (petroleum ether/ethyl acetate = 15/1). Mp= 103 – 104 °C.

**<sup>1</sup>H NMR** (400 MHz, CDCl<sub>3</sub>) δ/ppm = 8.27 (s, 1H), 7.63 (d, *J* = 7.9 Hz, 1H), 7.43 –



7.33 (m, 2H), 7.23 (ddd,  $J = 8.2, 7.0, 1.2$  Hz, 1H), 7.20 – 7.06 (m, 3H), 6.93 (d,  $J = 7.9$  Hz, 2H), 2.21 (s, 3H).

$^{13}\text{C}$  NMR (100 MHz,  $\text{CDCl}_3$ )  $\delta/\text{ppm} = 136.4, 135.6, 131.1, 130.0, 129.9, 129.1, 129.1, 122.9, 120.8, 120.4, 111.4, 98.5, 21.0$ .

Spectral data are in good agreement with literature values.<sup>1</sup>

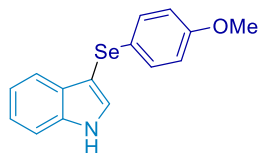

**3-((4-Methoxyphenyl)selanyl)-1H-indole (7b).** Compound **7b** was prepared according to the general procedure and isolated as a solid (57 mg, 76% yield) after flash chromatography (petroleum ether/ethyl acetate = 10/1). Mp= 84 – 85 °C.

$^1\text{H}$  NMR (400 MHz,  $\text{CDCl}_3$ )  $\delta/\text{ppm} = 8.19$  (s, 1H), 7.56 (dd,  $J = 7.9, 1.2$  Hz, 1H), 7.28 – 7.20 (m, 2H), 7.18 – 7.10 (m, 3H), 7.10 – 7.06 (m, 1H), 6.59 (d,  $J = 8.8$  Hz, 2H), 3.59 (s, 3H).

$^{13}\text{C}$  NMR (100 MHz,  $\text{CDCl}_3$ )  $\delta/\text{ppm} = 158.3, 136.4, 131.3, 130.8, 129.9, 123.5, 122.9, 120.8, 120.3, 114.8, 111.5, 99.3, 55.3$ .

Spectral data are in good agreement with literature values.<sup>1</sup>

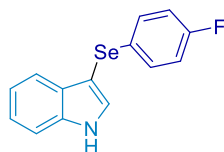

**3-((4-Fluorophenyl)selanyl)-1H-indole (7c).** Compound **7c** was prepared according to the general procedure and isolated as a solid (58 mg, 80% yield) after flash chromatography (petroleum ether/ethyl acetate = 10/1). Mp= 125 – 126 °C.

$^1\text{H}$  NMR (400 MHz,  $\text{CDCl}_3$ )  $\delta/\text{ppm} = 8.30$  (s, 1H), 7.53 (d,  $J = 7.9$  Hz, 1H), 7.42 – 7.27 (m, 2H), 7.23 – 7.06 (m, 4H), 6.74 (t,  $J = 8.7$  Hz, 2H).

$^{13}\text{C}$  NMR (100 MHz,  $\text{CDCl}_3$ )  $\delta/\text{ppm} = \delta 161.6$  (d,  $J_{\text{C-F}} = 244.6$  Hz), 136.4, 131.1, 130.75 (d,  $J_{\text{C-F}} = 7.6$  Hz), 130.0, 128.0 (d,  $J_{\text{C-F}} = 3.2$  Hz), 123.1, 121.0, 120.2, 116.1 (d,  $J_{\text{C-F}} = 21.6$  Hz), 111.5, 98.6.

$^{19}\text{F}$  NMR (376 MHz,  $\text{CDCl}_3$ )  $\delta/\text{ppm} = -117.2$ .

Spectral data are in good agreement with literature values.<sup>7</sup>

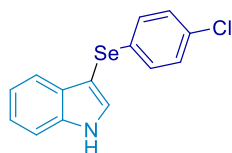

**3-((4-Chlorophenyl)selanyl)-1H-indole (7d).** Compound **7d** was prepared according to the general procedure and isolated as a solid (64 mg, 83% yield) after flash chromatography (petroleum ether/ethyl acetate = 10/1). Mp= 148 – 149 °C.

$^1\text{H}$  NMR (400 MHz,  $\text{CDCl}_3$ )  $\delta/\text{ppm} = 8.34$  (s, 1H), 7.51 (d,  $J = 8.0$  Hz, 1H), 7.39 –

7.29 (m, 2H), 7.22 – 7.13 (m, 1H), 7.12 – 7.01 (m, 3H), 6.99 (d,  $J = 8.6$  Hz, 2H).

$^{13}\text{C}$  NMR (100 MHz,  $\text{CDCl}_3$ )  $\delta/\text{ppm} = 136.4, 132.1, 131.6, 131.3, 130.0, 129.7, 129.1, 123.1, 121.1, 120.2, 111.5, 97.8$ .

Spectral data are in good agreement with literature values.<sup>7</sup>

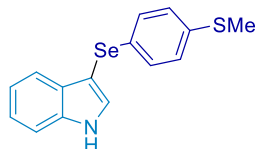

**3-((4-(Methylthio)phenyl)selanyl)-1H-indole (7e).** Compound **7e** was prepared according to the general procedure and isolated as a solid (57 mg, 71% yield) after flash chromatography (petroleum ether/ethyl acetate = 8/1). Mp= 108 – 109 °C.

$^1\text{H}$  NMR (400 MHz,  $\text{CDCl}_3$ )  $\delta/\text{ppm} = 8.37$  (s, 1H), 7.54 (d,  $J = 7.9$  Hz, 1H), 7.43 – 7.25 (m, 2H), 7.24 – 7.12 (m, 1H), 7.13 – 7.04 (m, 3H), 6.95 (d,  $J = 8.3$  Hz, 2H), 2.31 (s, 3H).

$^{13}\text{C}$  NMR (100 MHz,  $\text{CDCl}_3$ )  $\delta/\text{ppm} = 136.4, 135.7, 131.1, 130.3, 129.8, 129.5, 127.6, 123.0, 120.9, 120.3, 111.4, 98.2, 16.2$ .

HRMS:  $m/z$   $[\text{M} + \text{H}]^+$  calcd for  $\text{C}_{15}\text{H}_{14}\text{NSSe}$ , 320.0007; found, 320.0024.

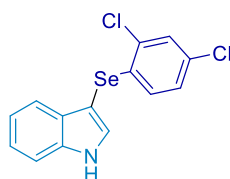

**3-((2,4-Dichlorophenyl)selanyl)-1H-indole (7f).** Compound **7f** was prepared according to the general procedure and isolated as an oil (64 mg, 75% yield) after flash chromatography (petroleum ether/ethyl acetate = 8/1).

$^1\text{H}$  NMR (400 MHz,  $\text{CDCl}_3$ )  $\delta/\text{ppm} = 8.57$  (s, 1H), 7.56 (d,  $J = 8.0$  Hz, 1H), 7.52 – 7.42 (m, 2H), 7.36 – 7.25 (m, 2H), 7.19 (t,  $J = 7.6$  Hz, 1H), 6.83 (d,  $J = 8.5$  Hz, 1H), 6.60 (d,  $J = 8.0$  Hz, 1H).

$^{13}\text{C}$  NMR (100 MHz,  $\text{CDCl}_3$ )  $\delta/\text{ppm} = 136.6, 133.1, 132.4, 132.1, 131.5, 129.7, 129.6, 128.9, 127.4, 123.3, 121.3, 120.2, 111.6, 96.5$ .

HRMS:  $m/z$   $[\text{M} + \text{H}]^+$  calcd for  $\text{C}_{14}\text{H}_{10}\text{Cl}_2\text{NSe}$ , 341.9350; found, 341.9353.

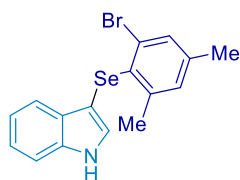

**3-((2-Bromo-4,6-dimethylphenyl)selanyl)-1H-indole (7g).** Compound **7g** was prepared according to the general procedure and isolated as a solid (73 mg, 77% yield) after flash chromatography (petroleum ether/ethyl acetate = 12/1). Mp= 135 – 136 °C.

$^1\text{H}$  NMR (400 MHz,  $\text{CDCl}_3$ )  $\delta/\text{ppm} = 8.11$  (s, 1H), 7.60 (d,  $J = 7.7$  Hz, 1H), 7.31 – 7.14 (m, 3H), 7.11 – 7.01 (m, 2H), 6.78 (s, 1H), 2.45 (s, 3H), 2.09 (s, 3H).

**<sup>13</sup>C NMR** (100 MHz, CDCl<sub>3</sub>) δ/ppm = 144.7, 139.8, 136.0, 131.4, 130.3, 130.0, 129.8, 129.8, 122.6, 120.5, 120.5, 111.3, 100.4, 25.5, 20.7.

**HRMS:** m/z [M + H]<sup>+</sup> calcd for C<sub>16</sub>H<sub>15</sub>BrNSe, 379.9548; found, 379.9540.

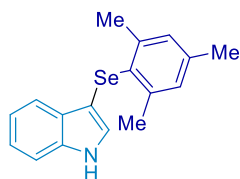

**3-(Mesitylselanyl)-1H-indole (7h).** Compound **7h** was prepared according to the general procedure and isolated as a solid (61 mg, 78% yield) after flash chromatography (petroleum ether/ethyl acetate = 8/1). Mp= 132 – 133 °C.

**<sup>1</sup>H NMR** (400 MHz, CDCl<sub>3</sub>) δ/ppm = 8.05 (s, 1H), 7.45 (d, *J* = 7.8 Hz, 1H), 7.22 (d, *J* = 8.2 Hz, 1H), 7.12 – 6.98 (m, 3H), 6.79 (s, 2H), 2.48 (s, 6H), 2.14 (s, 3H).

**<sup>13</sup>C NMR** (100 MHz, CDCl<sub>3</sub>) δ/ppm = 142.5, 137.9, 136.1, 129.6, 128.7, 128.7, 128.1, 122.4, 120.2, 120.2, 111.2, 101.0, 24.5, 20.9.

Spectral data are in good agreement with literature values.<sup>7</sup>

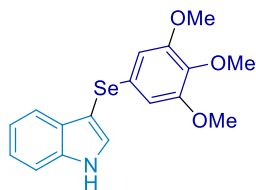

**3-((3,4,5-Trimethoxyphenyl)selanyl)-1H-indole (7i).** Compound **7i** was prepared according to the general procedure and isolated as a solid (60 mg, 66% yield) after flash chromatography (petroleum ether/ethyl acetate = 8/1). Mp= 129 – 130 °C.

**<sup>1</sup>H NMR** (400 MHz, CDCl<sub>3</sub>) δ/ppm = δ 8.71 (s, 1H), 7.66 (d, *J* = 7.8 Hz, 1H), 7.47 (d, *J* = 2.5 Hz, 1H), 7.41 (d, *J* = 7.7 Hz, 1H), 7.29 – 7.21 (m, 1H), 7.17 (td, *J* = 7.5, 6.9, 1.2 Hz, 1H), 6.51 (d, *J* = 1.1 Hz, 2H), 3.77 (d, *J* = 1.2 Hz, 3H), 3.64 (d, *J* = 1.2 Hz, 6H).

**<sup>13</sup>C NMR** (100 MHz, CDCl<sub>3</sub>) δ/ppm = 153.4 136.4, 136.2, 131.2, 129.8, 128.2, 122.9, 122.4, 120.8, 120.2, 106.2, 98.4, 60.9, 56.0.

Spectral data are in good agreement with literature values.<sup>8</sup>

## 6. References

1. S. K. Bhunia, P. Das and R. Jana, *Org. Biomol. Chem.*, 2018, **16**, 9243.
2. Y.-Q. Zhang, C.-F. Zhou and G.-Q. Liu, *Chin. J. Org. Chem.*, 2022, **42**, 218.
3. S. Guo, S. Li, Z. Zhang, W. Yan and H. Cai, *Tetrahedron Lett.*, 2020, **61**, 151566.
4. B. Yang, X.-Y. Zhang, H.-Q. Yue, W.-Z. Li, M. Li, L. Lu, Z.-Q. Wu, J. Li, K. Sun and S.-D. Yang, *Adv. Synth. Catal.*, 2022, **364**, 3528.
5. D. H. Mailahn, L. E. B. Iarocz, P. C. Nobre, G. Perin, A. Sinott, A. P. Pesarico, P. T. Birmann, L. Savegnago and M. S. Silva, *Eur. J. Med. Chem.*, 2021, **213**,

- 113052.
6. S. Mitra, S. Mukherjee, S. K. Sen and A. Hajra, *Bioorg. Med. Chem. Lett.*, 2014, **24**, 2198.
  7. G. T. Quadros, S. P. de Medeiros, C. A. de Oliveira, M. W. Rambo, L. Abenante, E. J. Lenardao and F. Penteado, *Asian J. Org. Chem.*, 2023, **12**, e202300517.
  8. Z. Wen, J. Xu, Z. Wang, H. Qi, Q. Xu, Z. Bai, Q. Zhang, K. Bao, Y. Wu and W. Zhang, *Eur. J. Med. Chem.*, 2015, **90**, 184.

## 7. Copies of NMR spectra

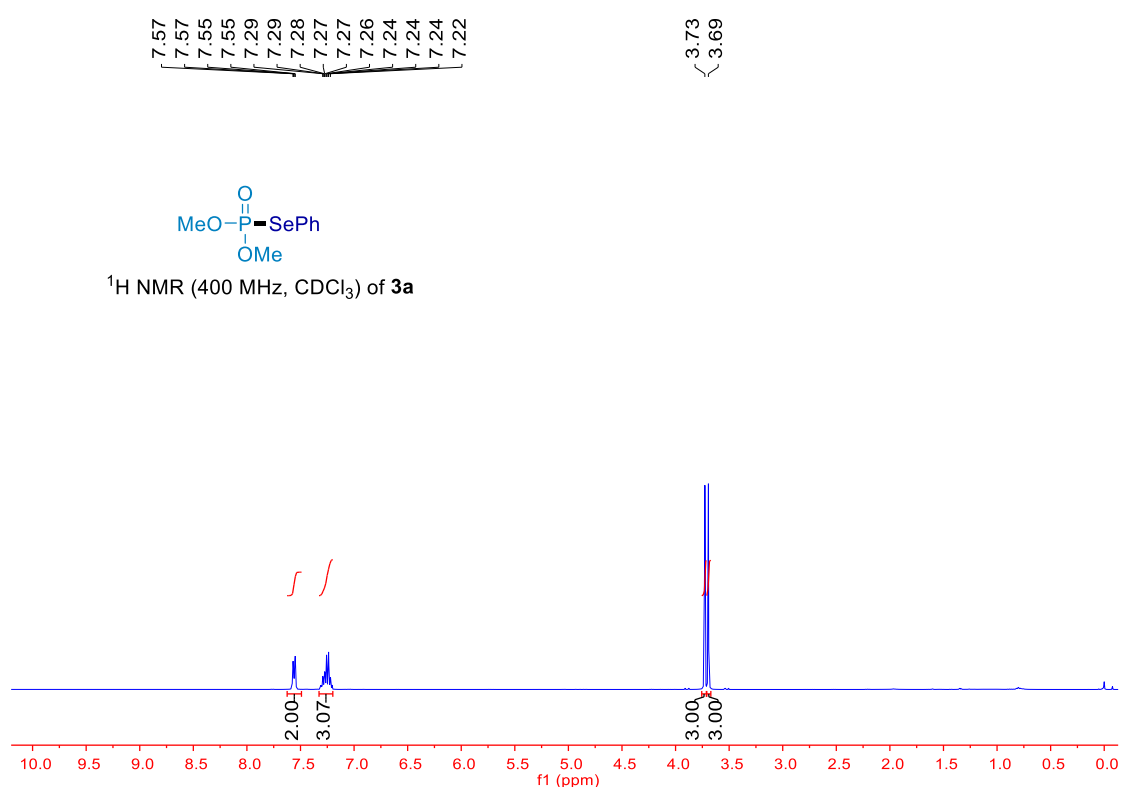

134.60  
134.56  
128.57  
128.55  
127.94  
127.91  
122.25  
122.16

53.01  
52.95

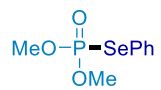

$^{13}\text{C}$  { $^1\text{H}$ } NMR (100 MHz,  $\text{CDCl}_3$ ) of **3a**

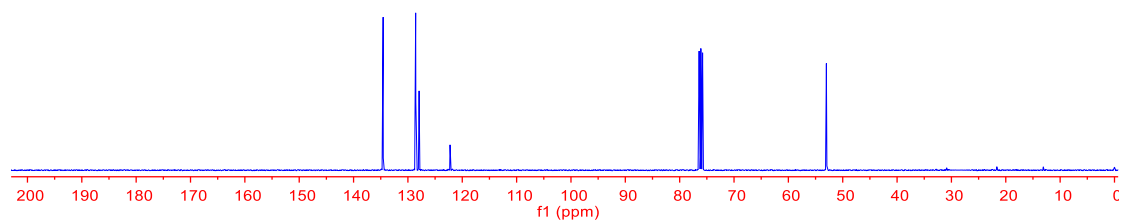

- 21.80

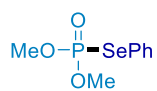

$^{31}\text{P}$  NMR (162 MHz,  $\text{CDCl}_3$ ) of **3a**

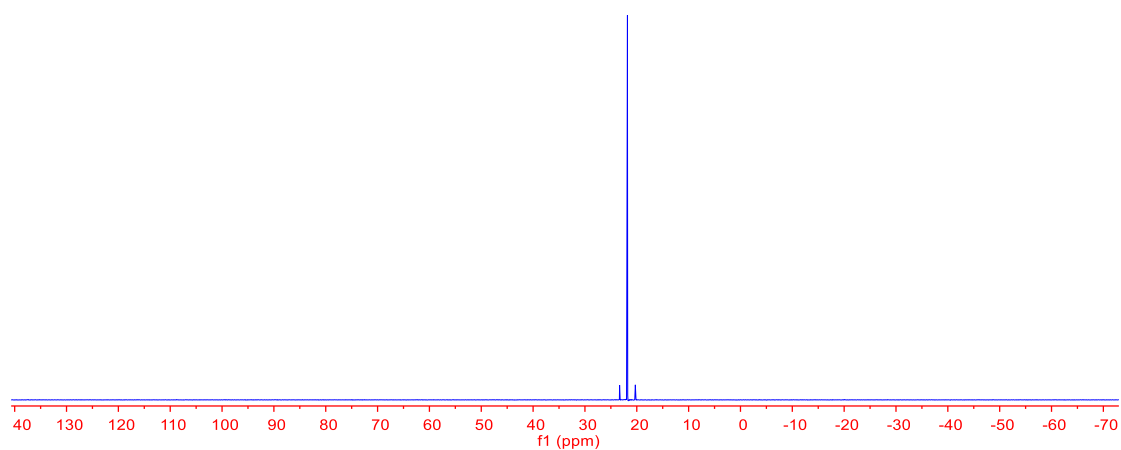

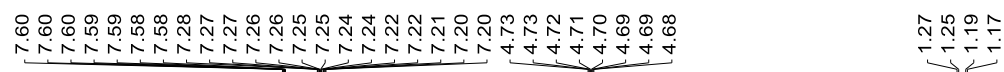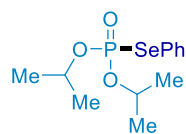

$^1\text{H}$  NMR (400 MHz,  $\text{CDCl}_3$ ) of **3b**

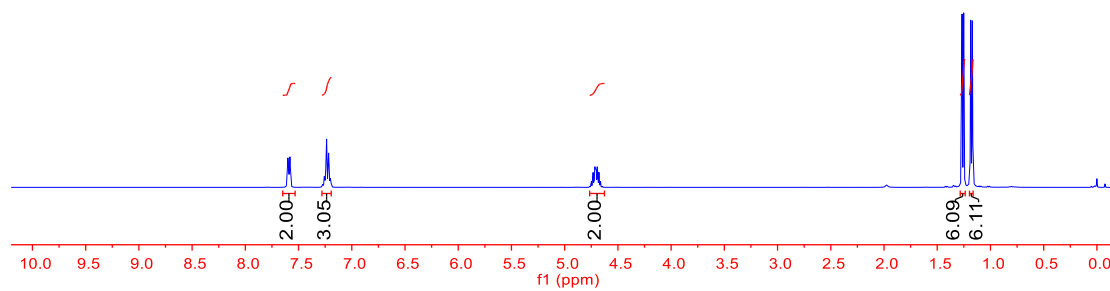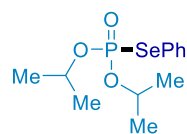

$^{13}\text{C}$   $\{^1\text{H}\}$  NMR (100 MHz,  $\text{CDCl}_3$ ) of **3b**

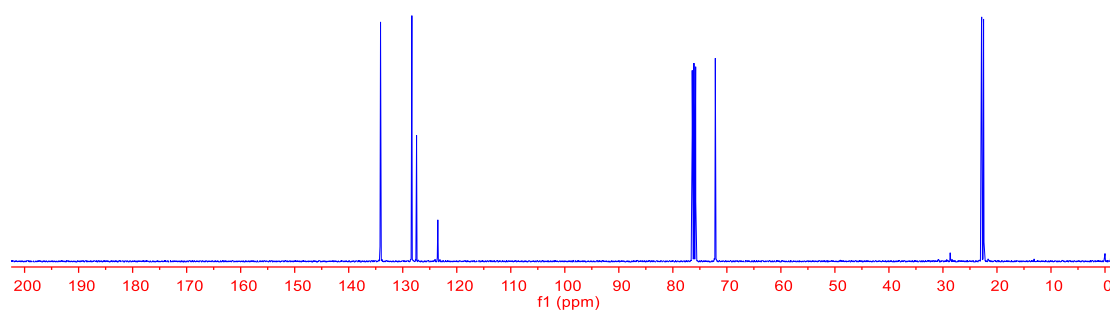

— 14.66

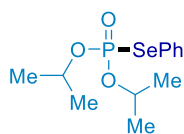

$^{31}\text{P}$  NMR (162 MHz,  $\text{CDCl}_3$ ) of **3b**

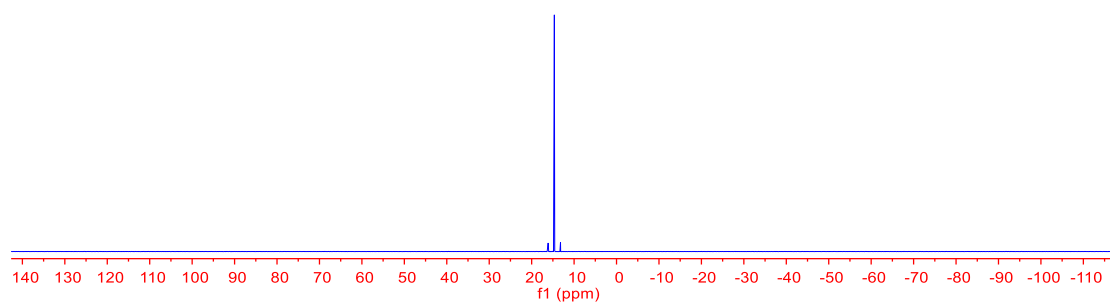

7.63  
7.63  
7.62  
7.62  
7.61  
7.61  
7.60  
7.26  
7.25  
7.24  
7.24  
7.23  
7.22  
7.22  
7.20

— 1.39

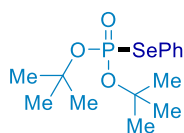

$^1\text{H}$  NMR (400 MHz,  $\text{CDCl}_3$ ) of **3c**

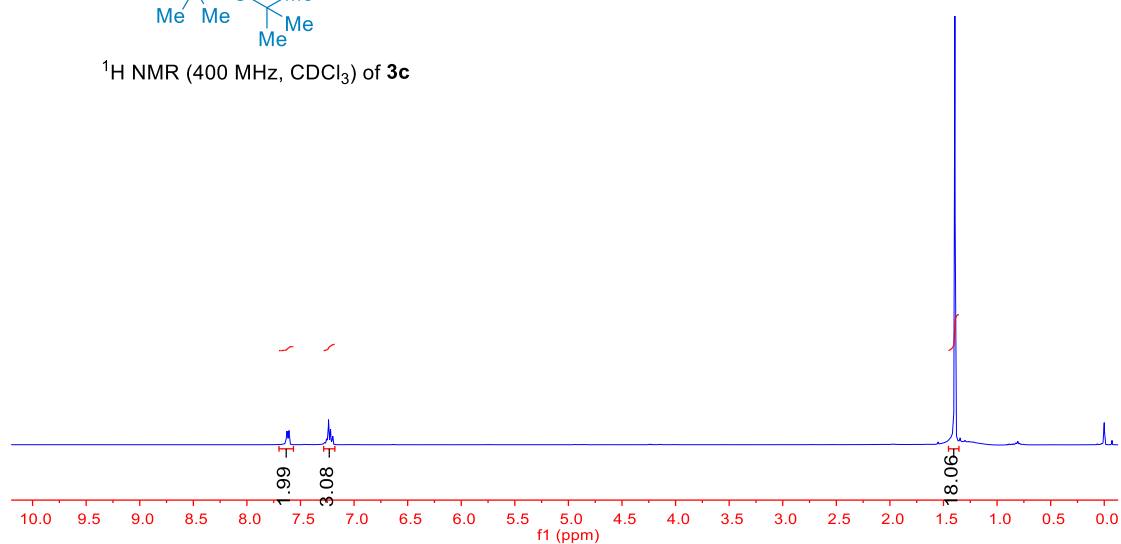

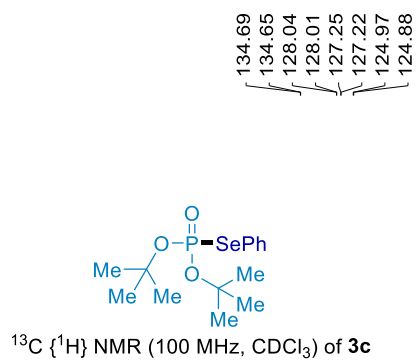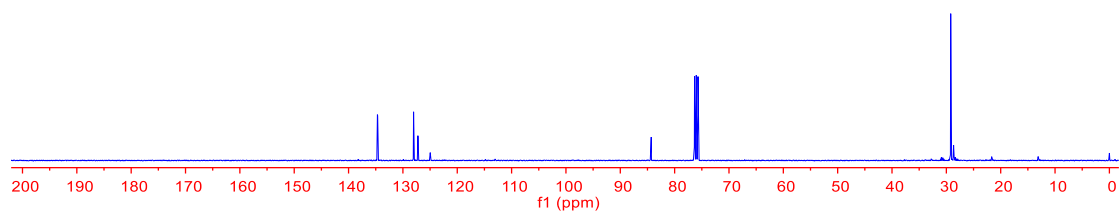

— 4.99

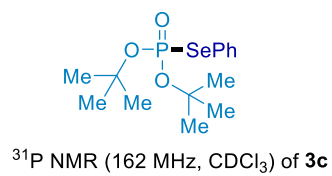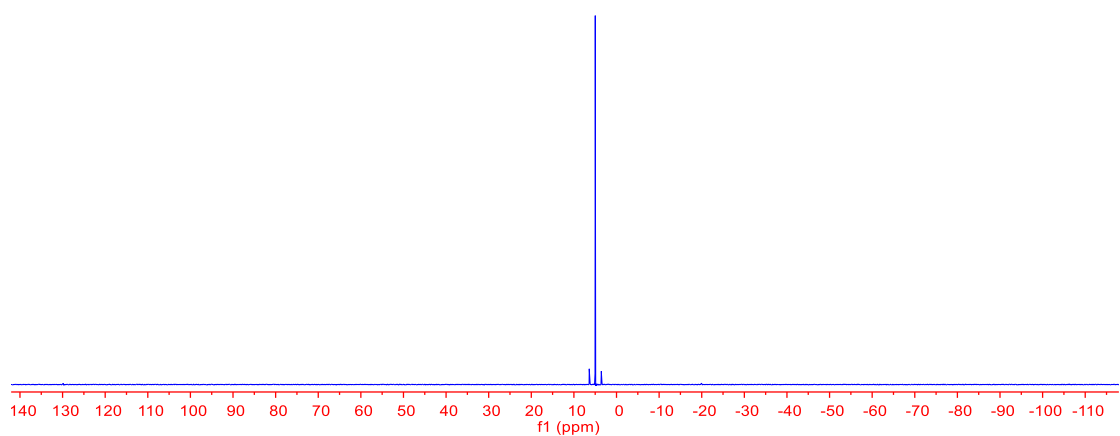



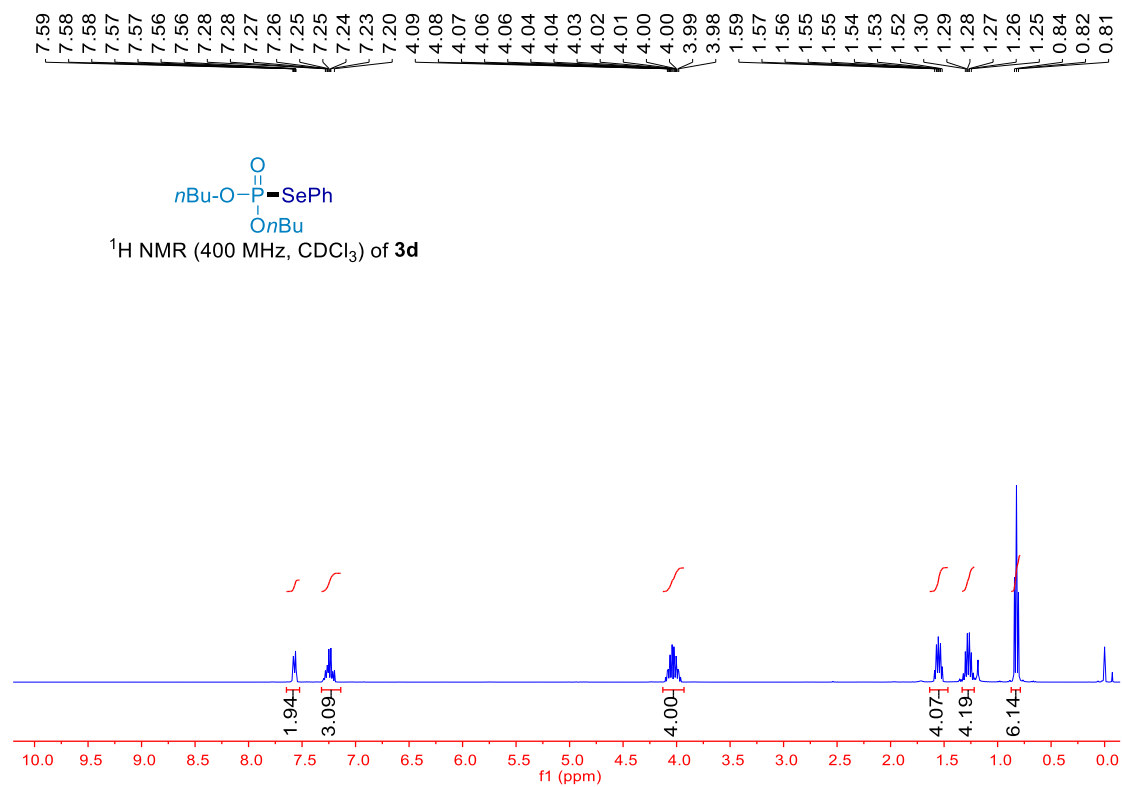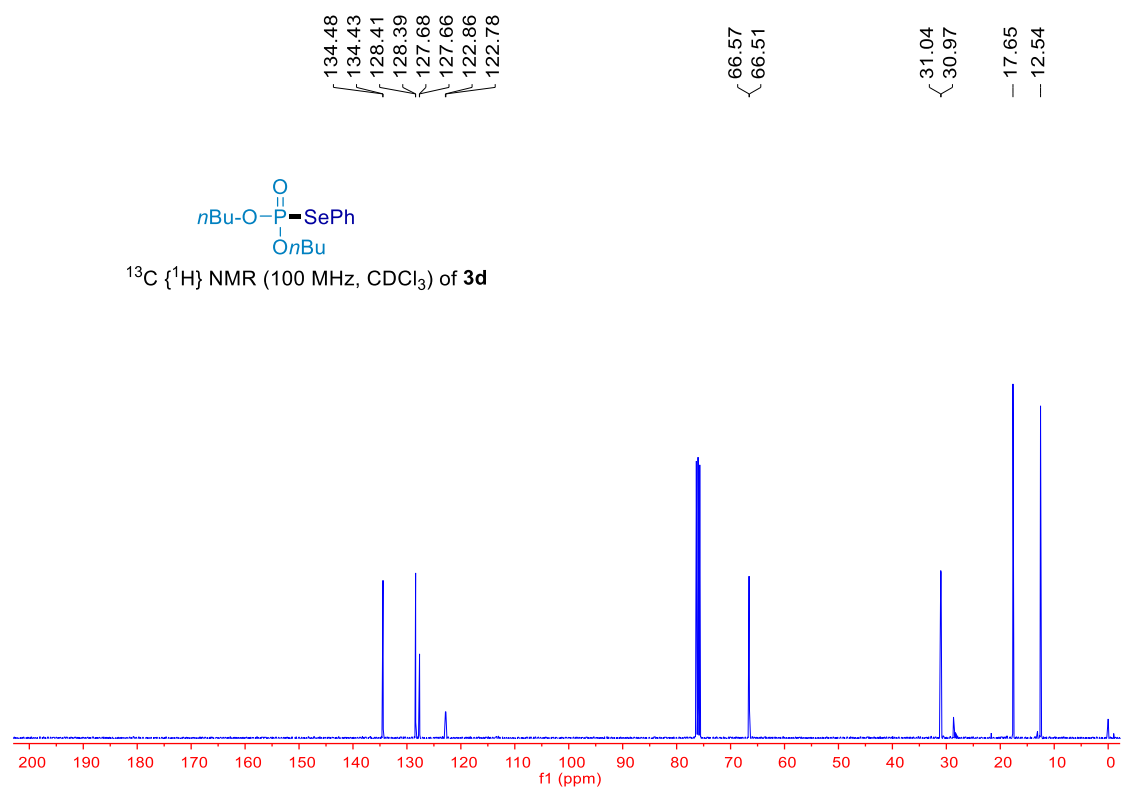

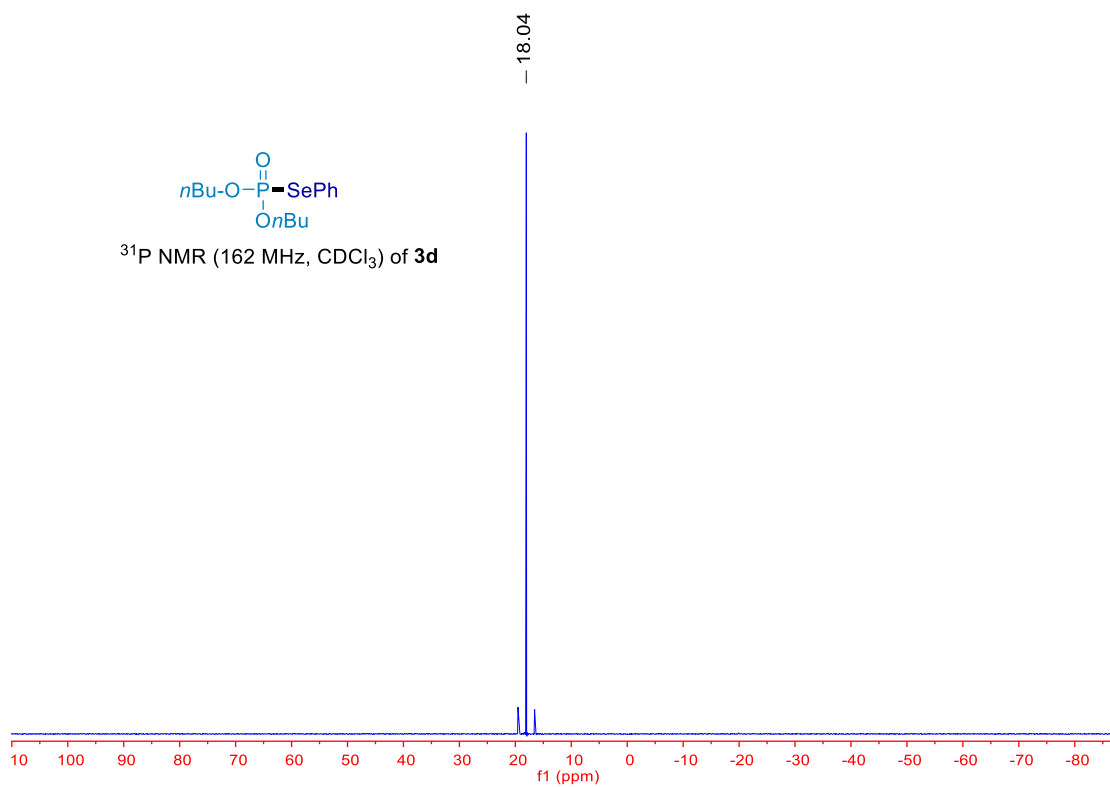

7.49  
7.49  
7.47  
7.47  
7.46  
7.25  
7.24  
7.23  
7.21  
7.20  
7.19  
7.18  
7.18  
7.17  
7.17  
7.16  
7.14  
7.14  
5.06  
5.05  
5.04  
5.03  
5.02  
5.01  
4.99

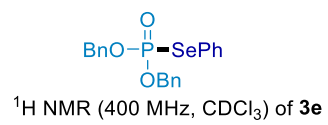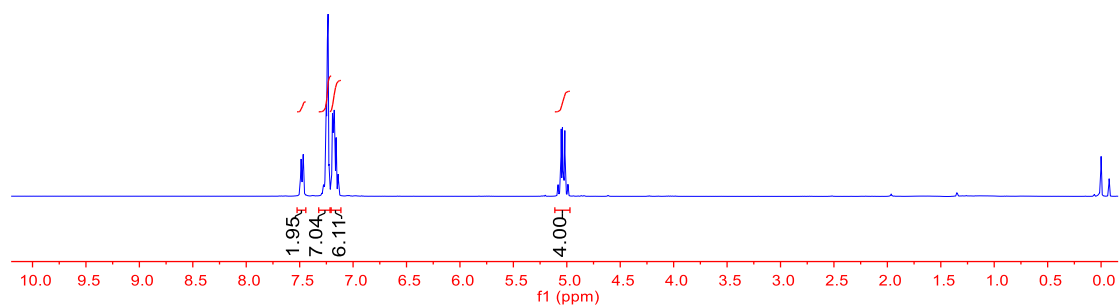

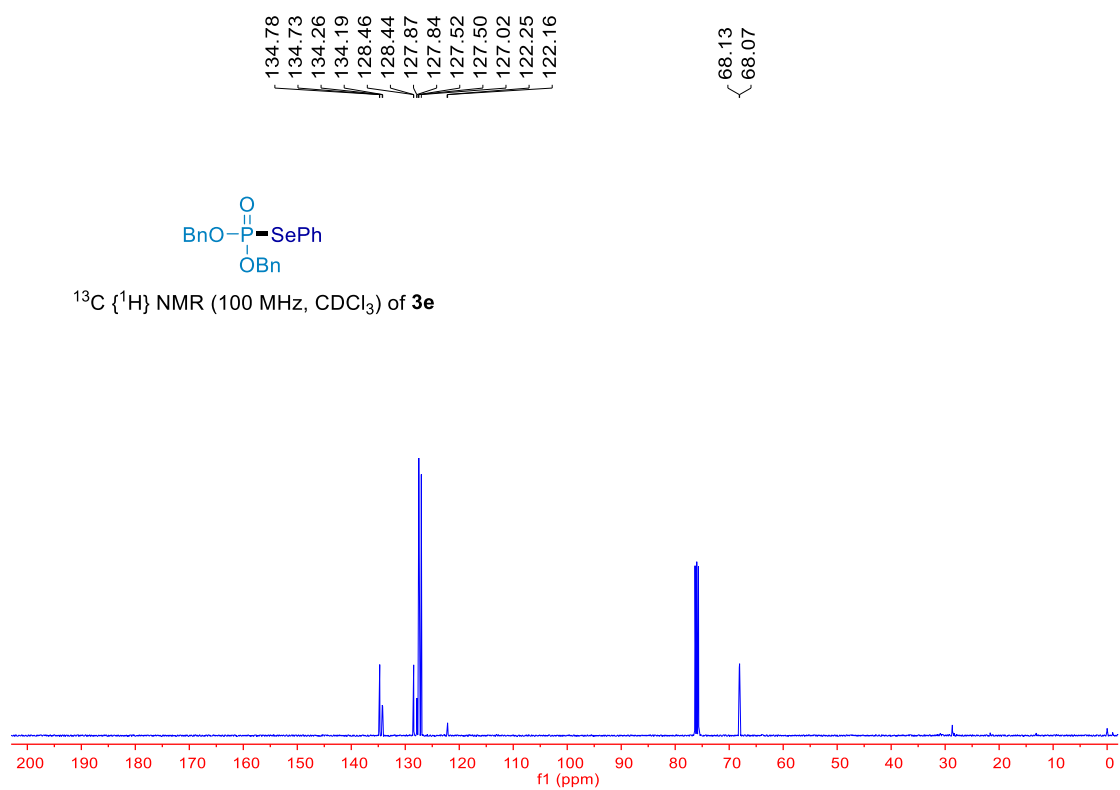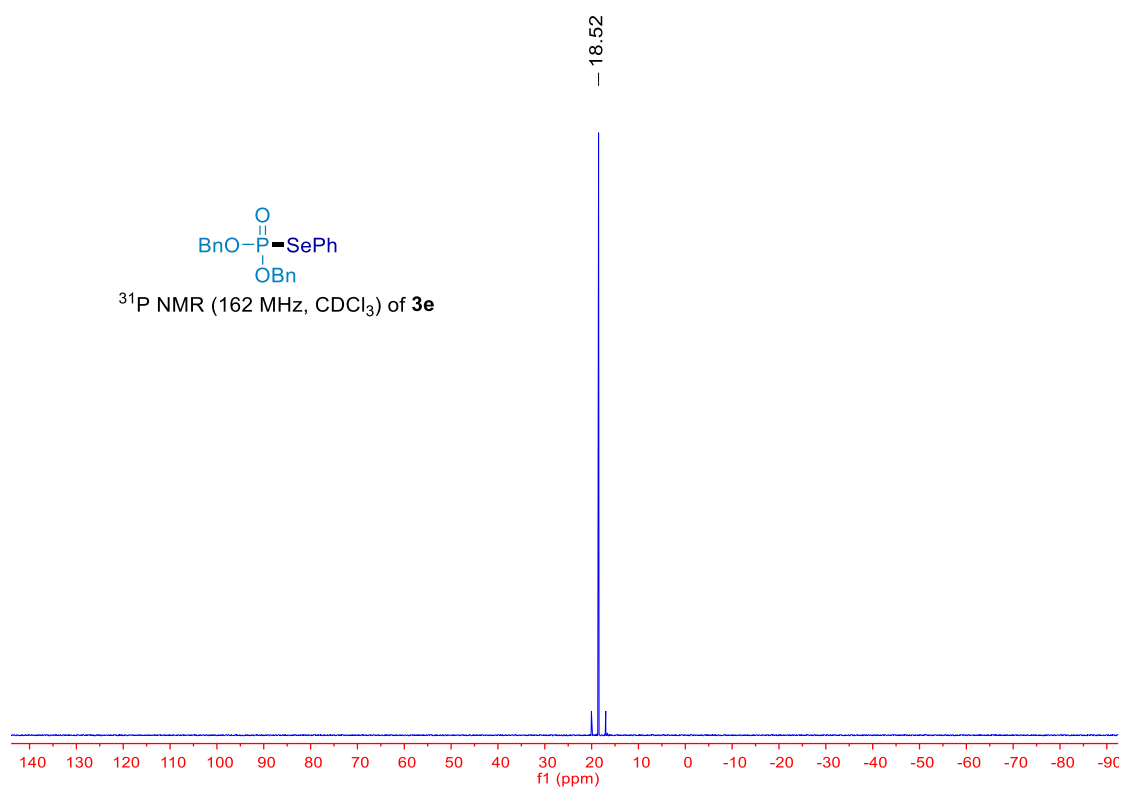

7.47  
7.45  
7.45  
7.28  
7.28  
7.26  
7.24  
7.22  
7.21  
7.19  
7.17  
7.15  
7.13  
7.13  
7.12  
7.11  
7.11  
7.10  
7.10

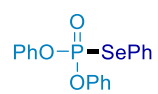

$^1\text{H}$  NMR (400 MHz,  $\text{CDCl}_3$ ) of **3f**

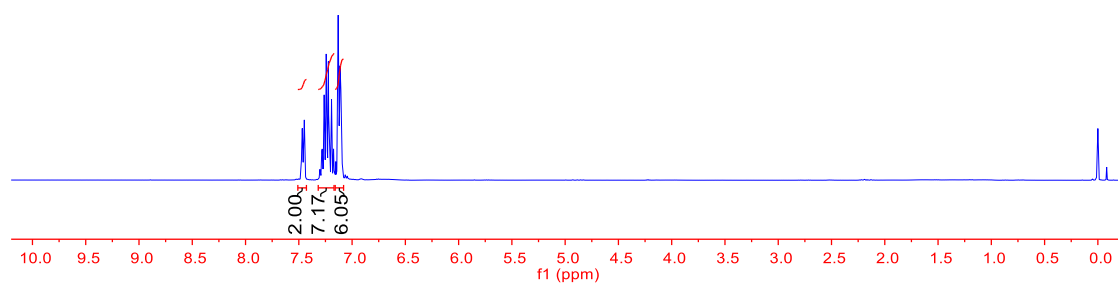

149.22  
149.13  
135.21  
135.16  
128.74  
128.73  
128.55  
128.52  
128.30  
128.28  
124.55  
124.54  
121.61  
121.52  
119.61  
119.56

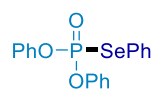

$^{13}\text{C}$   $\{^1\text{H}\}$  NMR (100 MHz,  $\text{CDCl}_3$ ) of **3f**

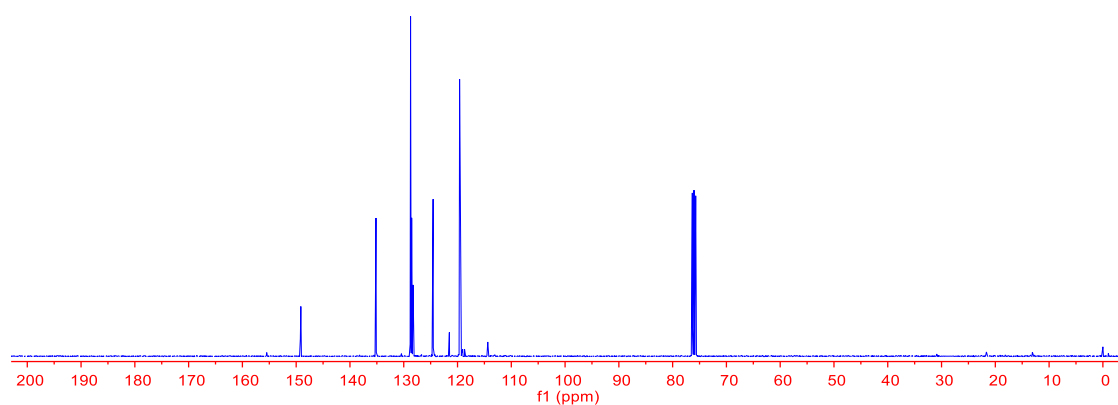

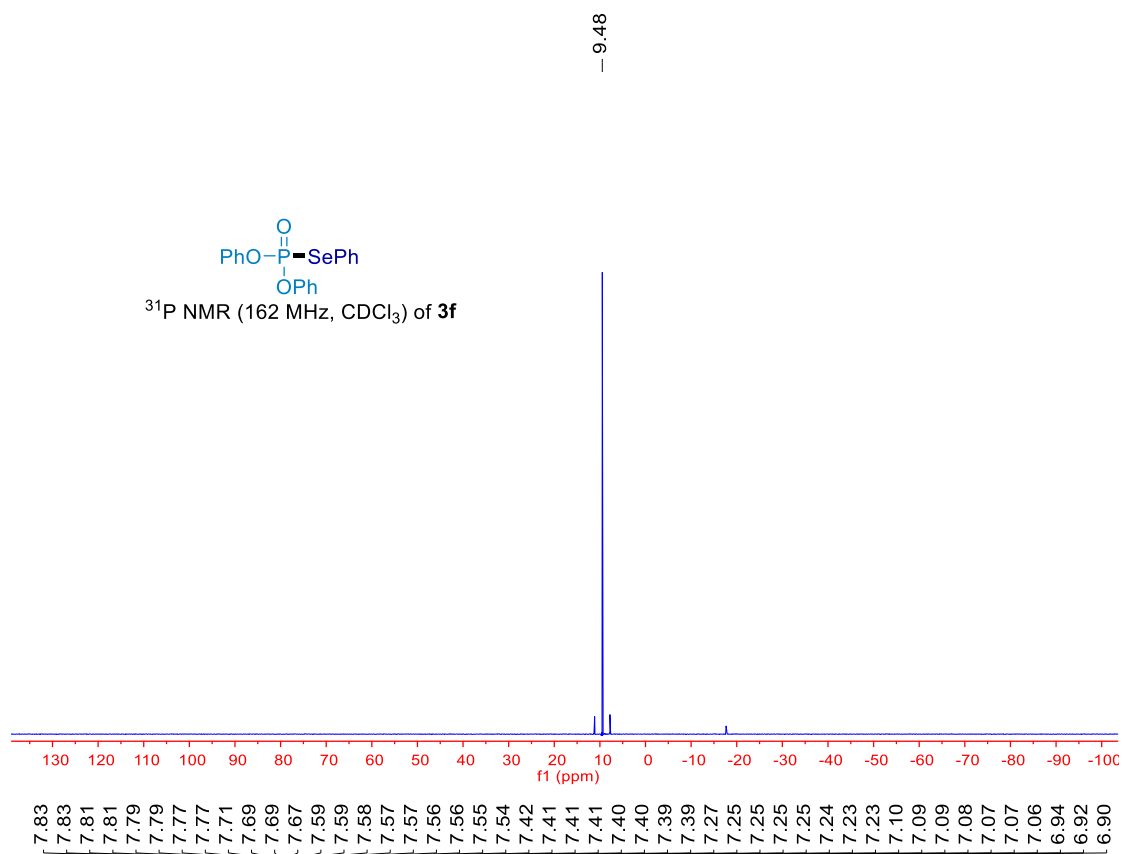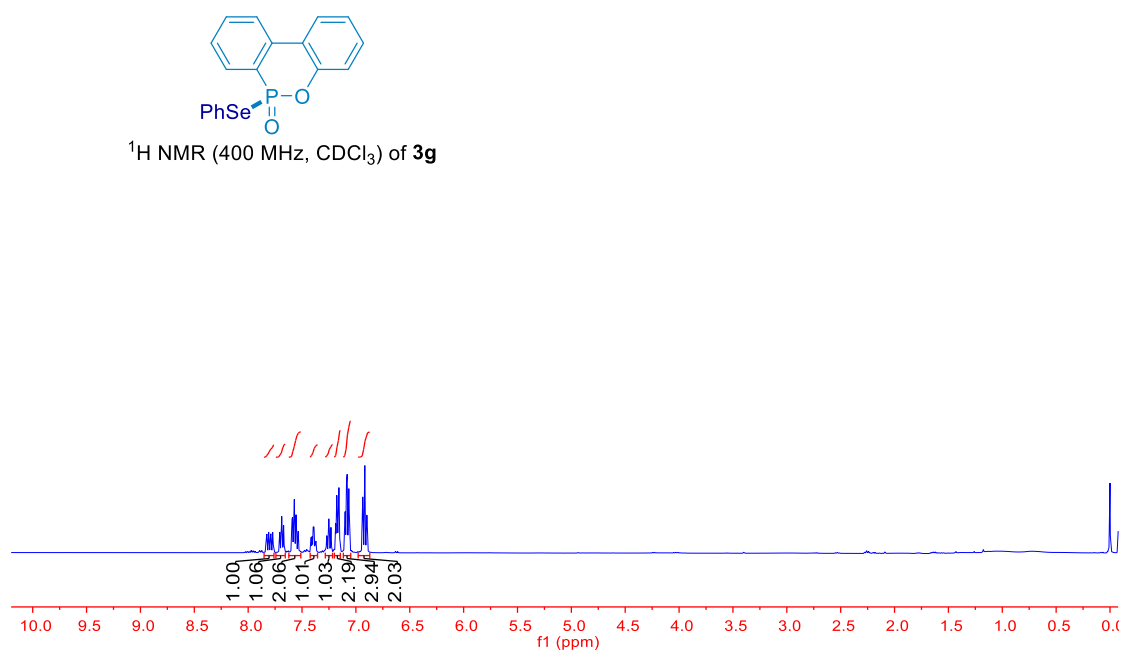

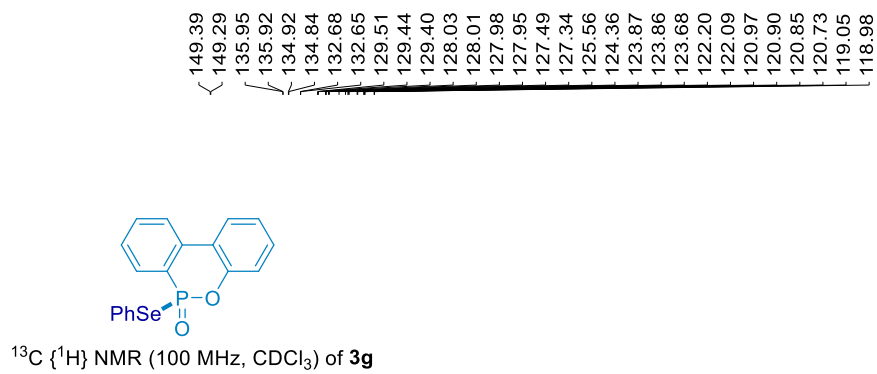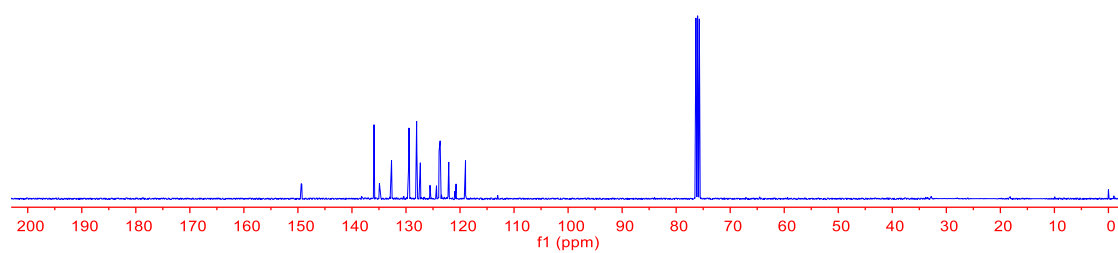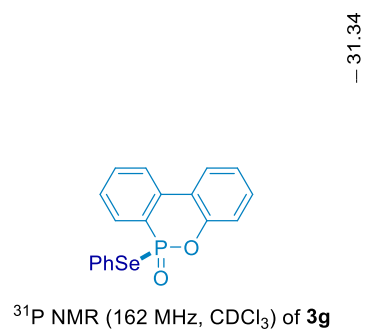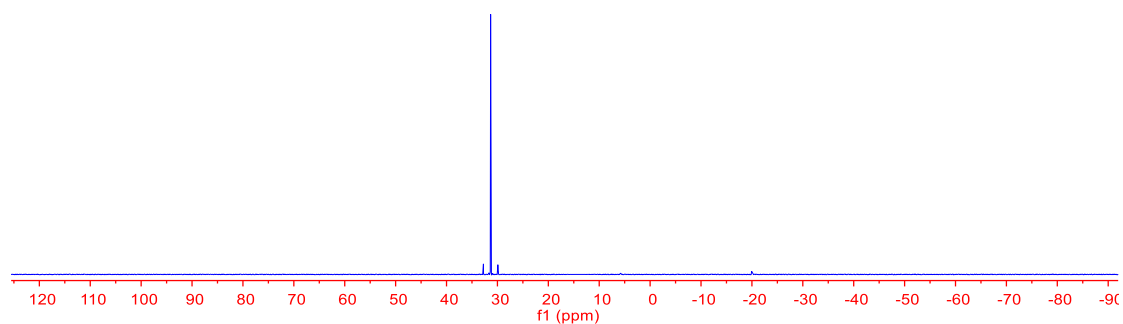

7.77  
7.75  
7.75  
7.74  
7.72  
7.72  
7.42  
7.42  
7.41  
7.41  
7.40  
7.40  
7.39  
7.37  
7.36  
7.35  
7.34  
7.33  
7.18  
7.16  
7.14  
7.09  
7.07  
7.05

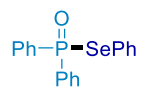

$^1\text{H}$  NMR (400 MHz,  $\text{CDCl}_3$ ) of **3h**

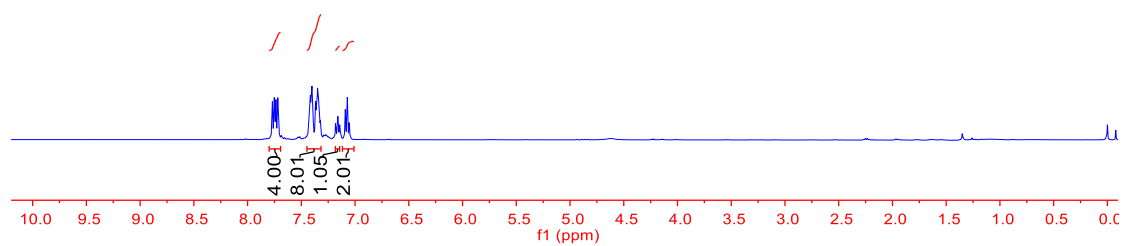

136.34  
136.31  
133.93  
132.96  
132.30  
132.27  
131.40  
131.30  
129.27  
129.25  
128.59  
128.46  
123.80  
123.75

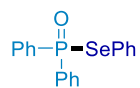

$^{13}\text{C}$   $\{^1\text{H}\}$  NMR (100 MHz,  $\text{CDCl}_3$ ) of **3h**

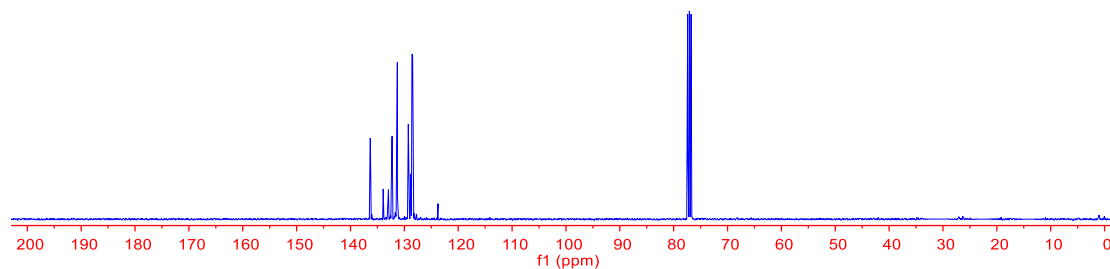

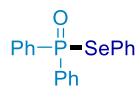

$^{31}\text{P}$  NMR (162 MHz,  $\text{CDCl}_3$ ) of **3h**

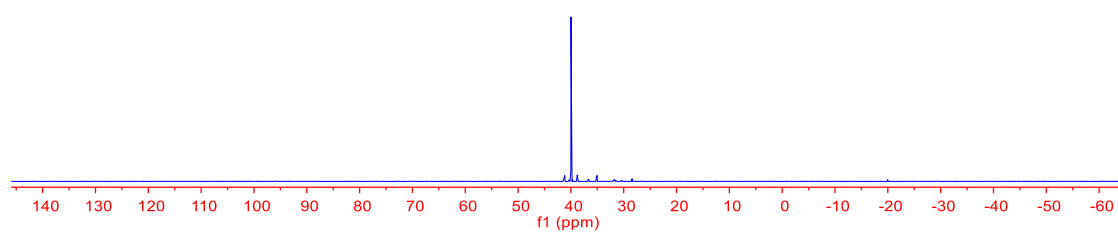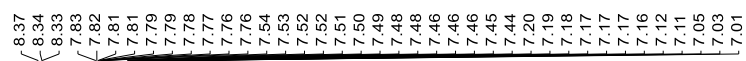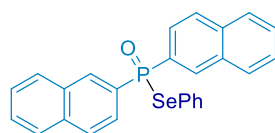

$^1\text{H}$  NMR (400 MHz,  $\text{CDCl}_3$ ) of **3i**

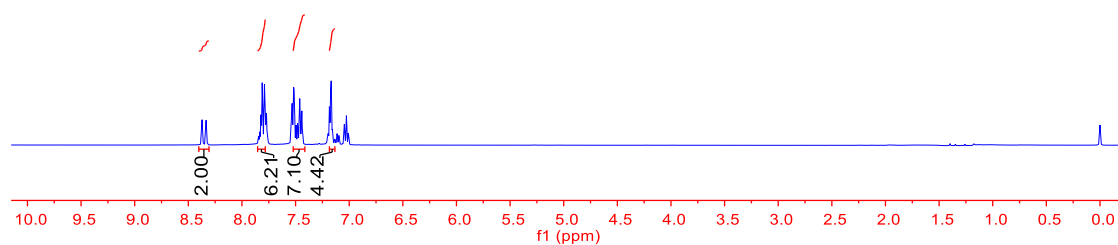



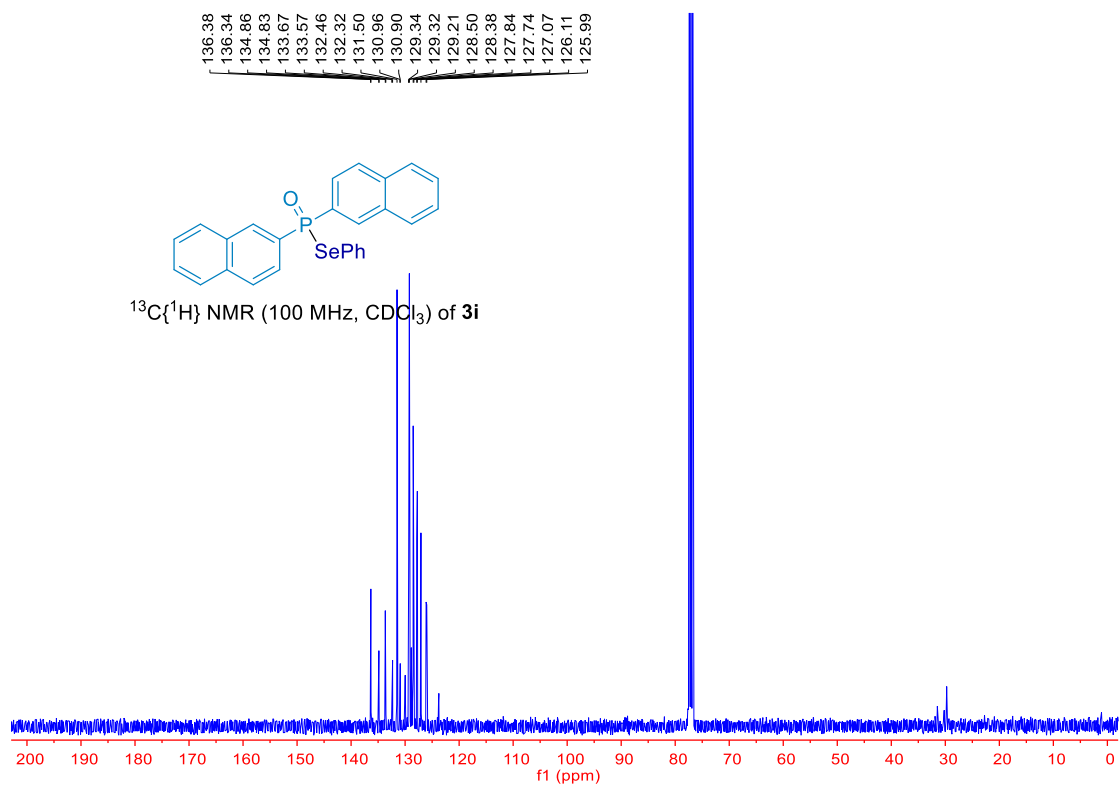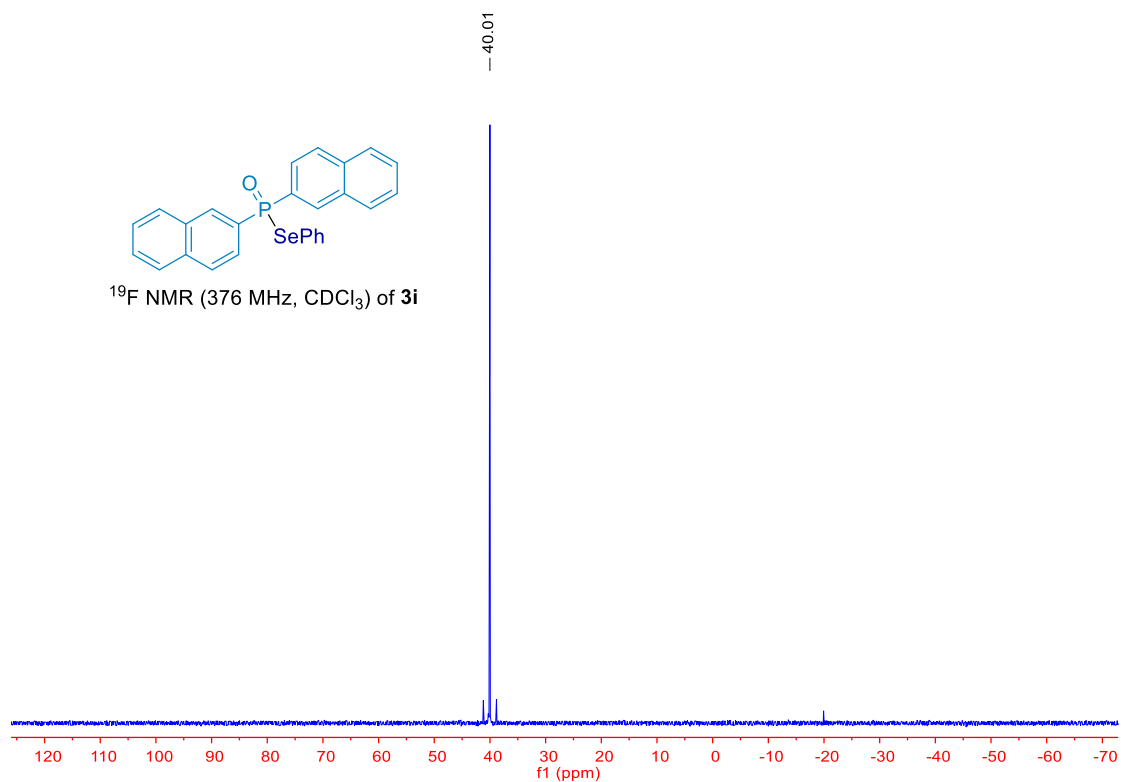

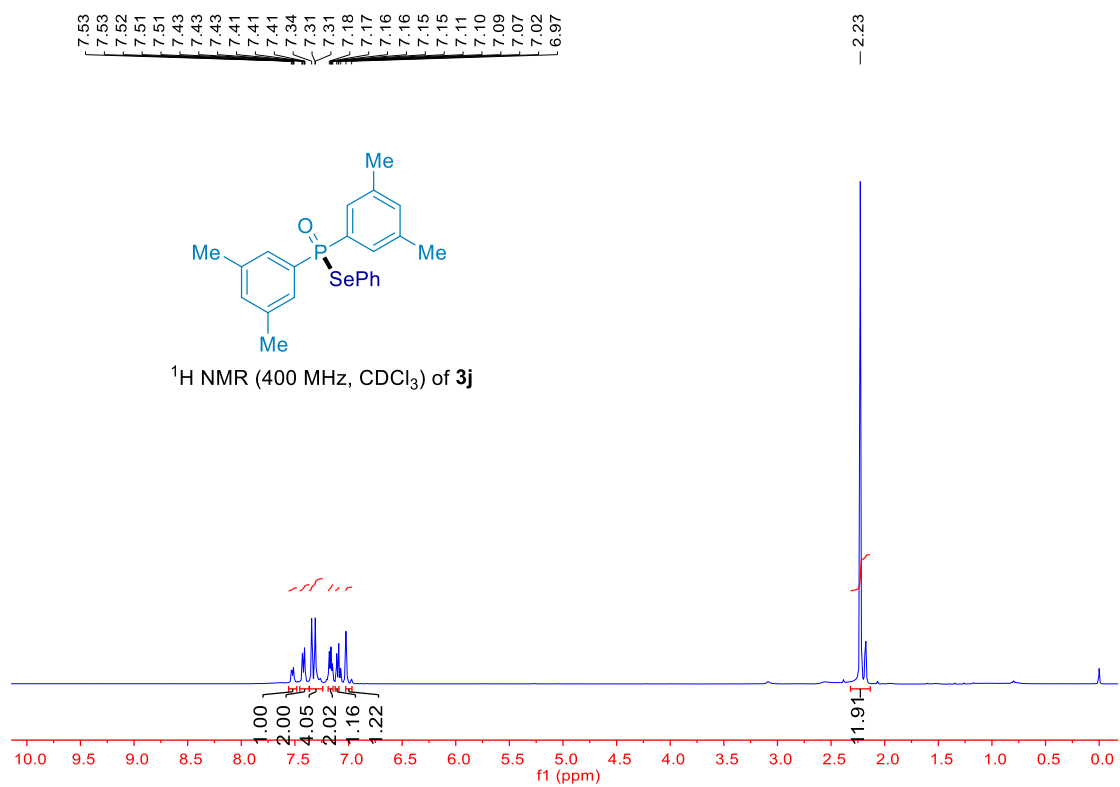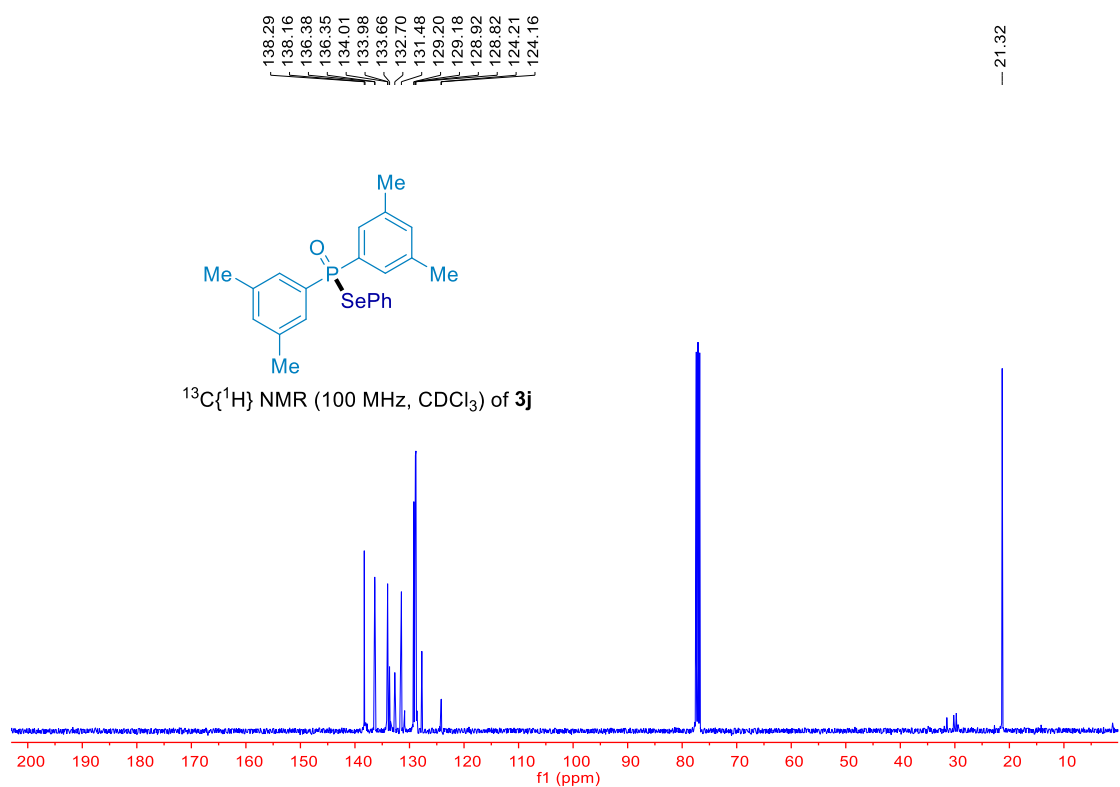

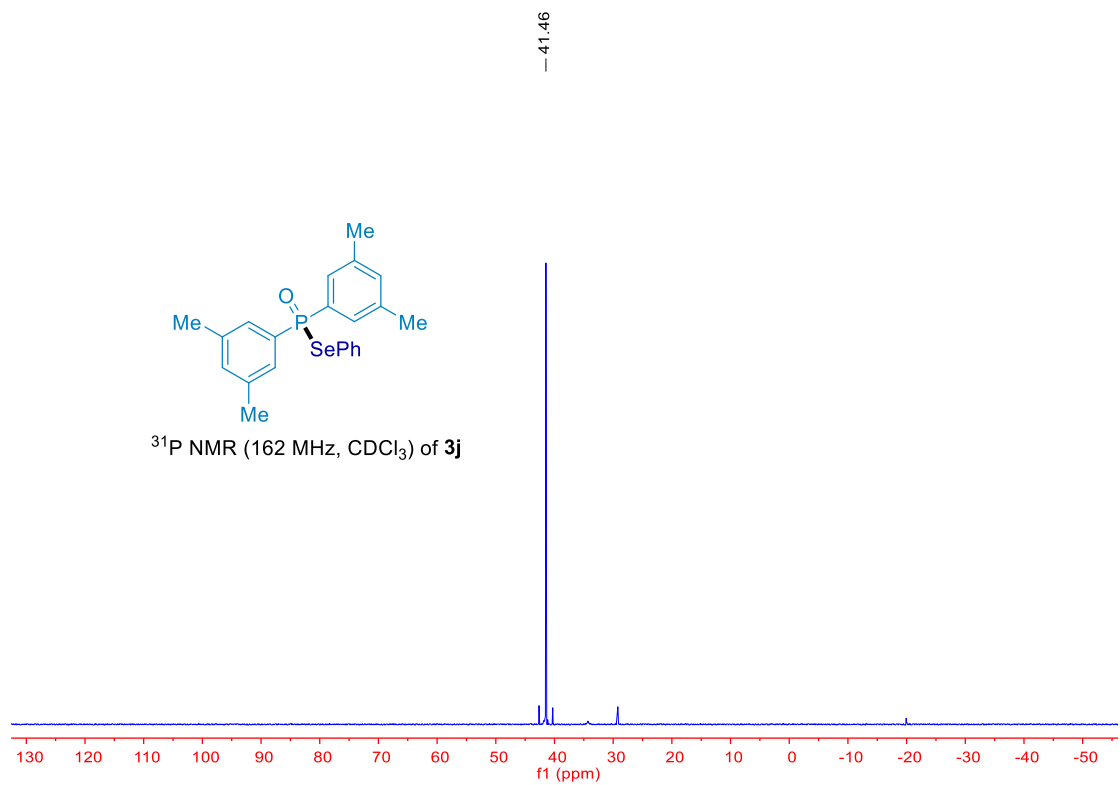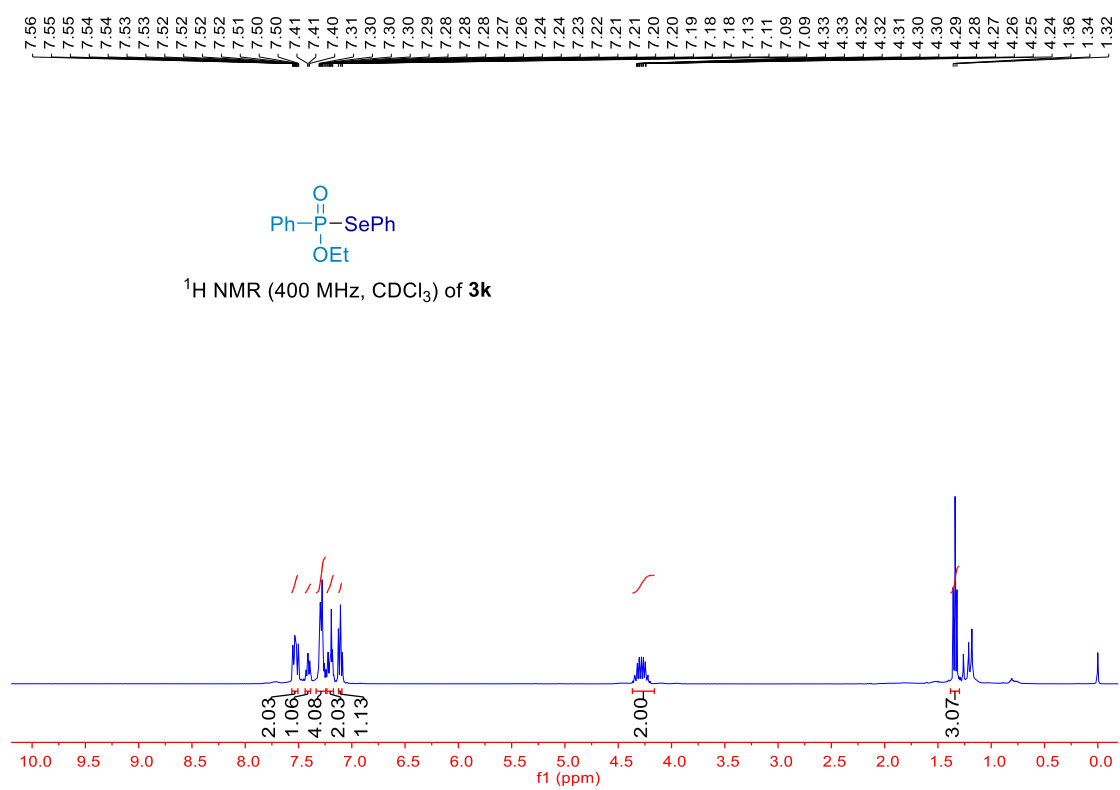

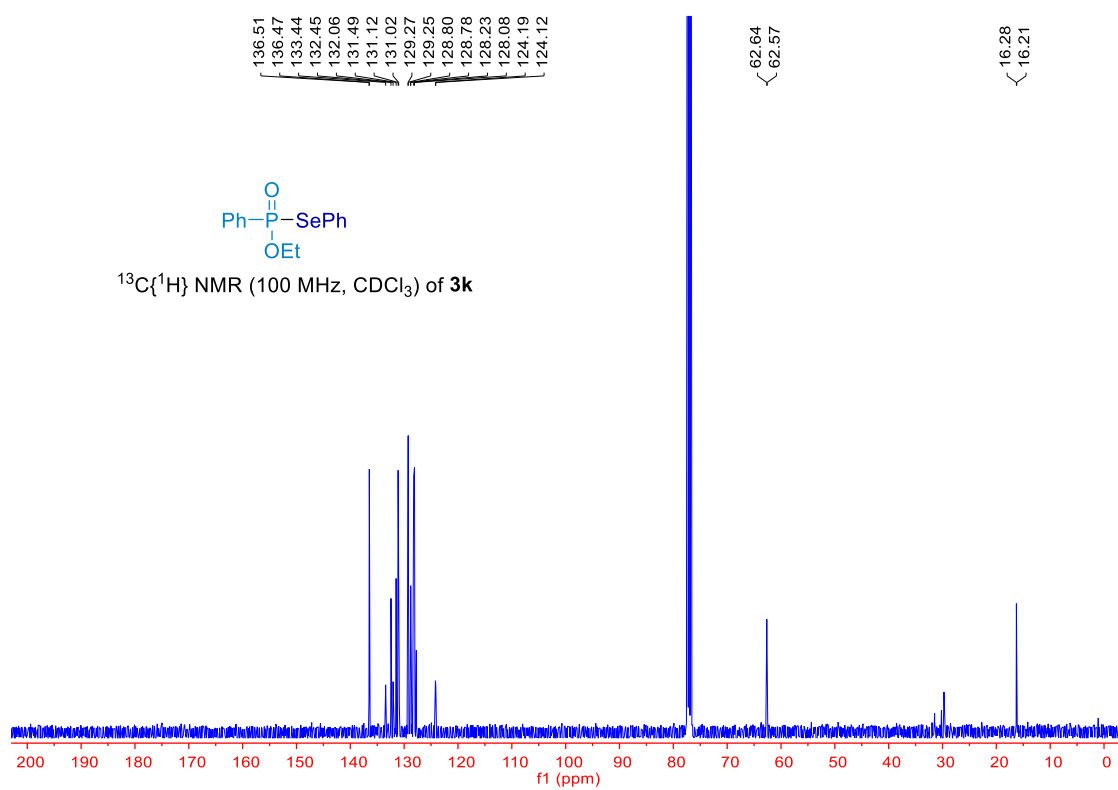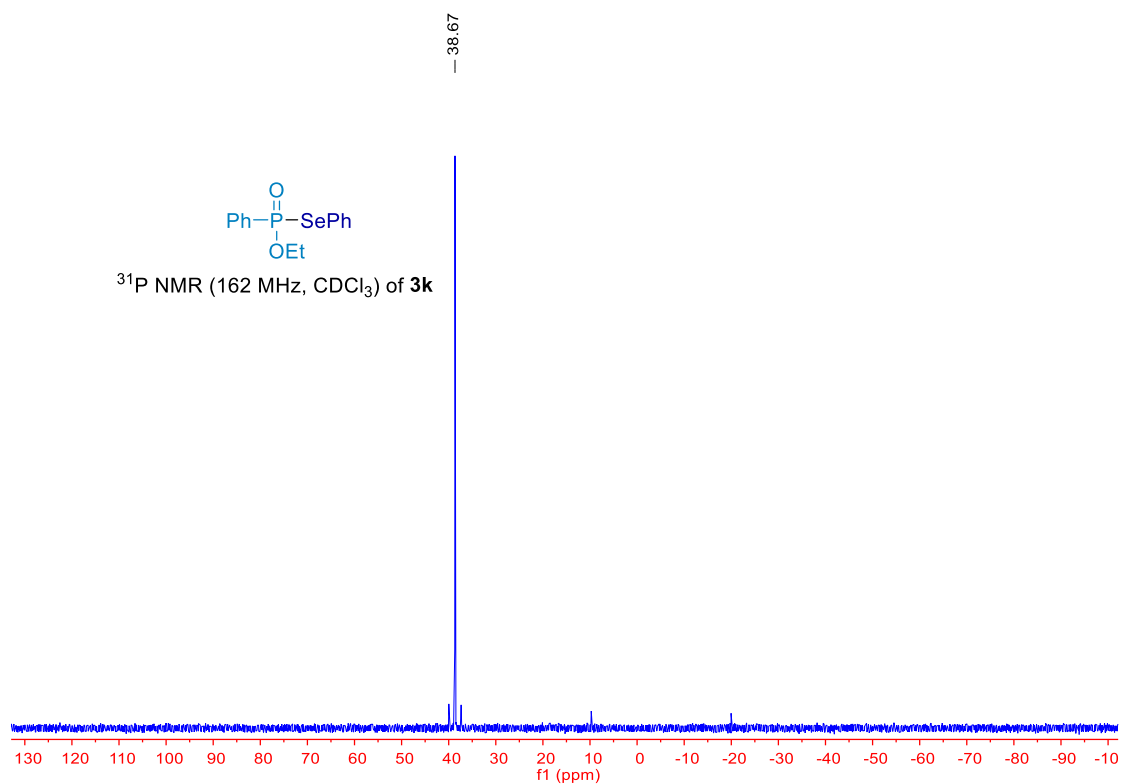

7.56  
7.56  
7.55  
7.55  
7.54  
7.54  
7.53  
7.52  
6.98  
6.96  
6.93

3.74  
3.71

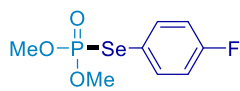

$^1\text{H}$  NMR (400 MHz,  $\text{CDCl}_3$ ) of **4a**

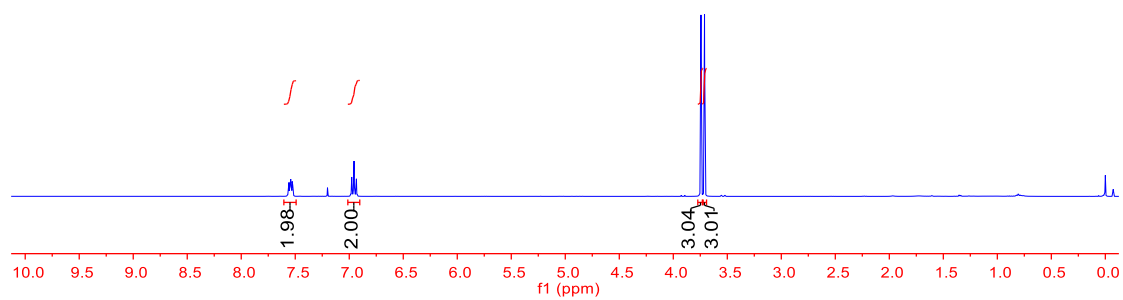

163.59  
163.56  
161.11  
161.08

136.78  
136.73  
136.69  
136.65  
116.84  
116.80  
116.75  
116.72  
116.00  
115.98  
115.79  
115.76

53.08  
53.02

28.67

21.67

13.11

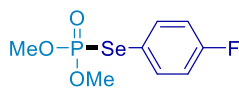

$^{13}\text{C}$   $\{^1\text{H}\}$  NMR (100 MHz,  $\text{CDCl}_3$ ) of **4a**

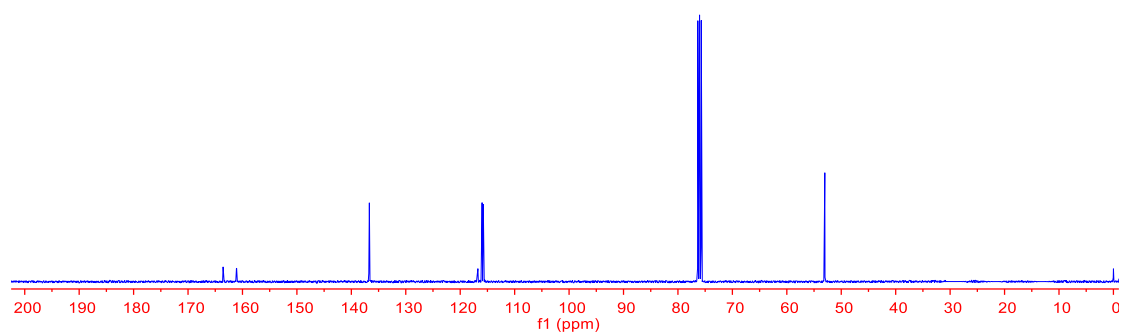

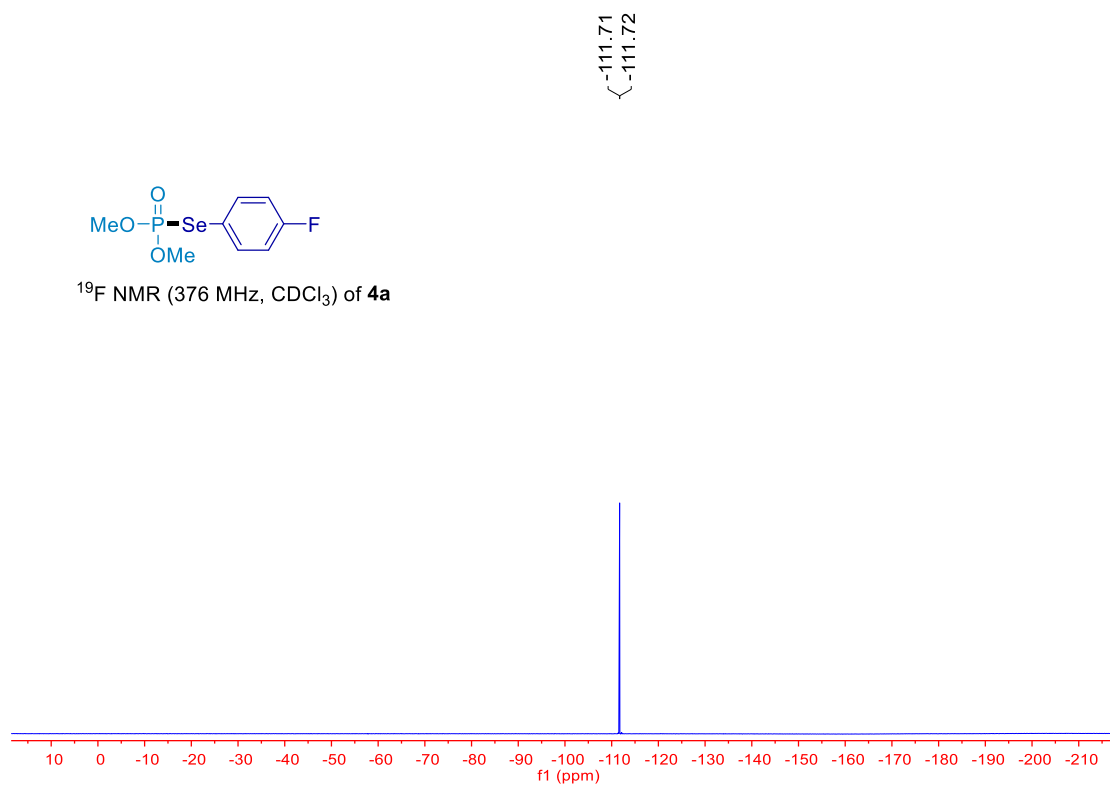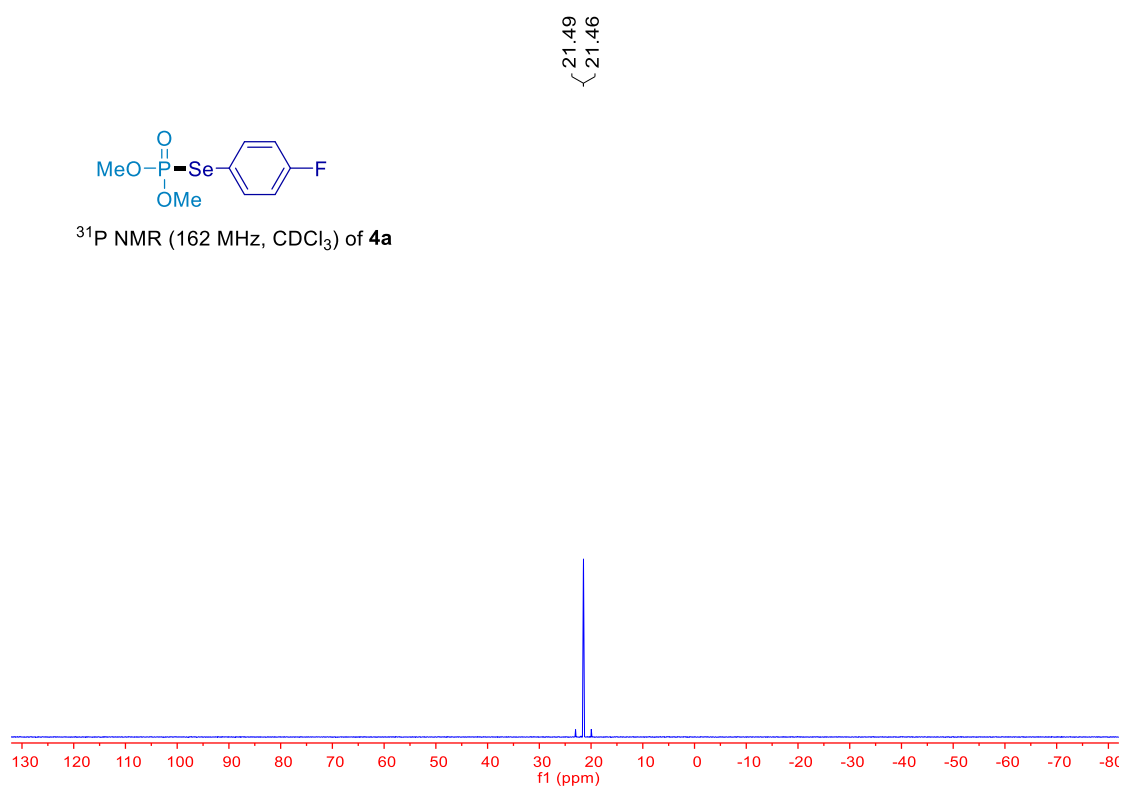

7.51  
7.50  
7.49  
7.48  
7.23  
7.21

3.74  
3.71

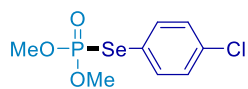

$^1\text{H}$  NMR (400 MHz,  $\text{CDCl}_3$ ) of **4b**

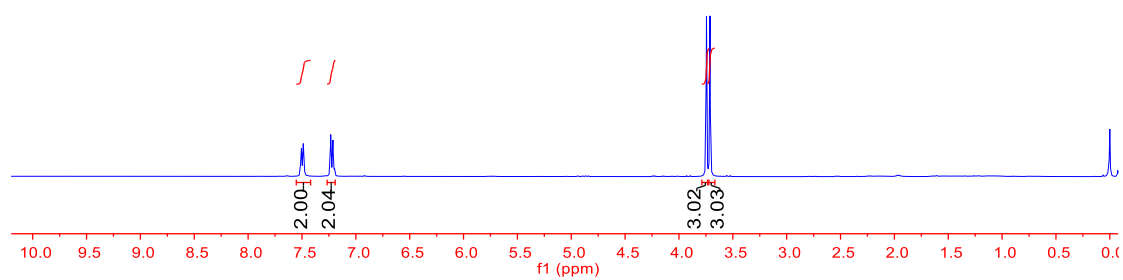

135.87  
135.83  
134.55  
134.52  
128.81  
128.79  
120.39  
120.30

53.12  
53.07

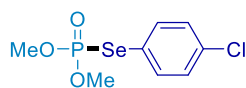

$^{13}\text{C}$   $\{^1\text{H}\}$  NMR (100 MHz,  $\text{CDCl}_3$ ) of **4b**

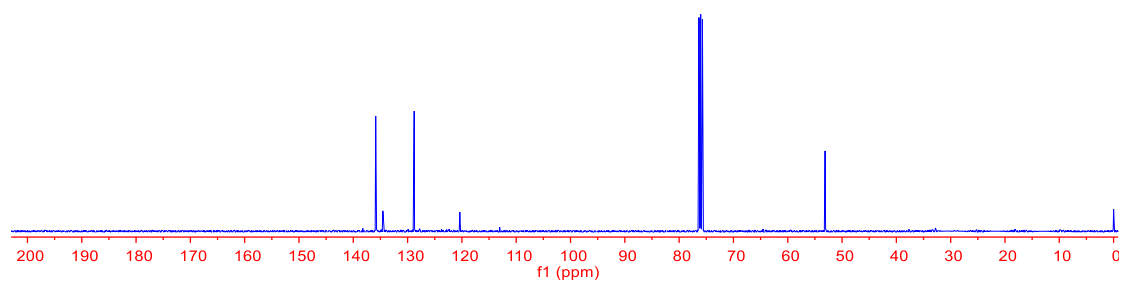

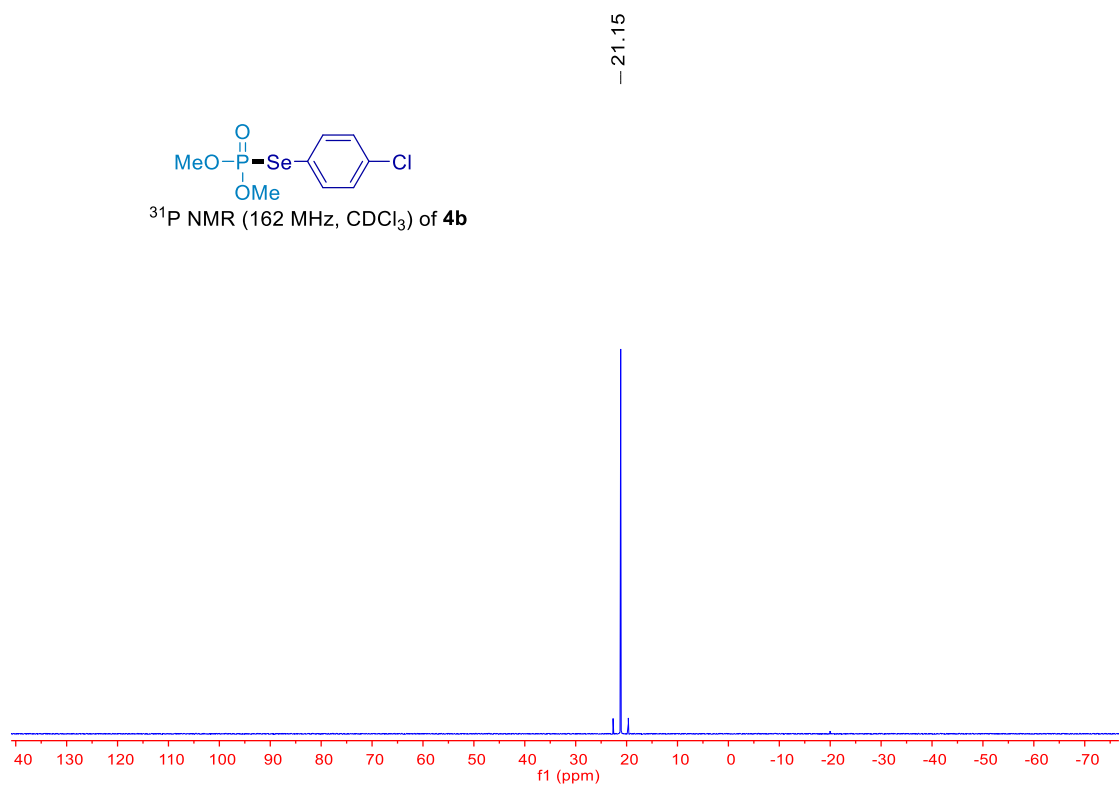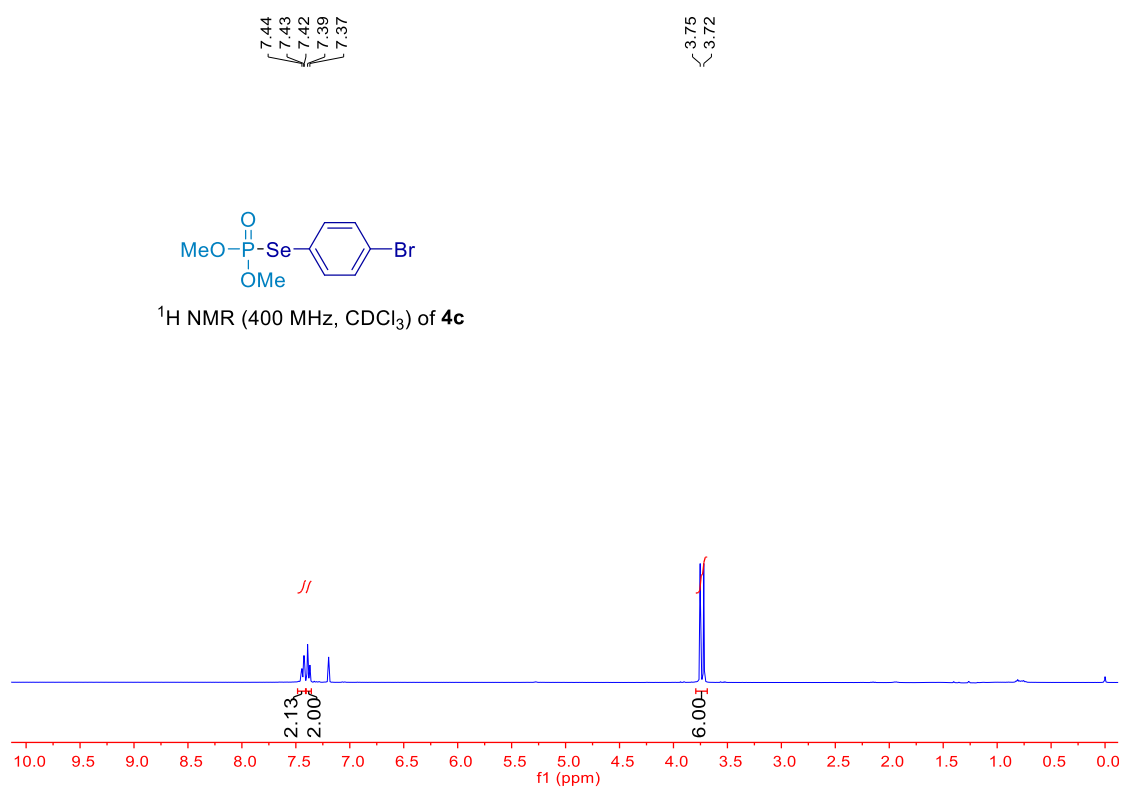



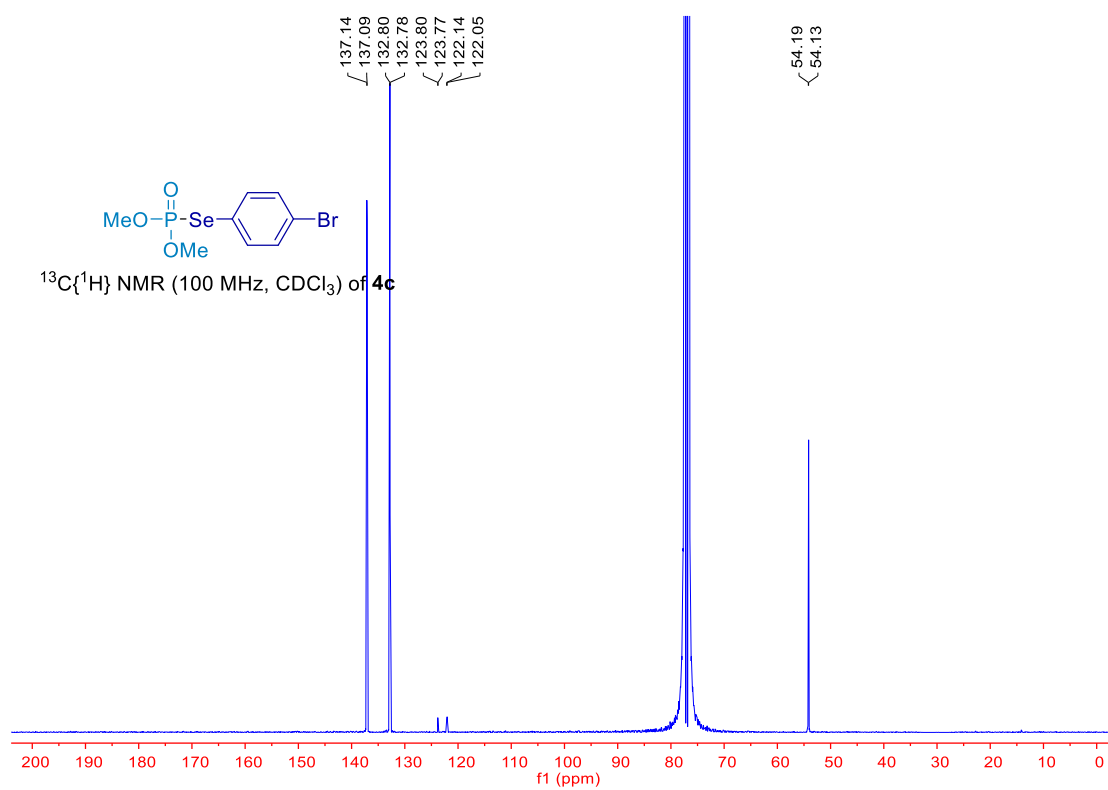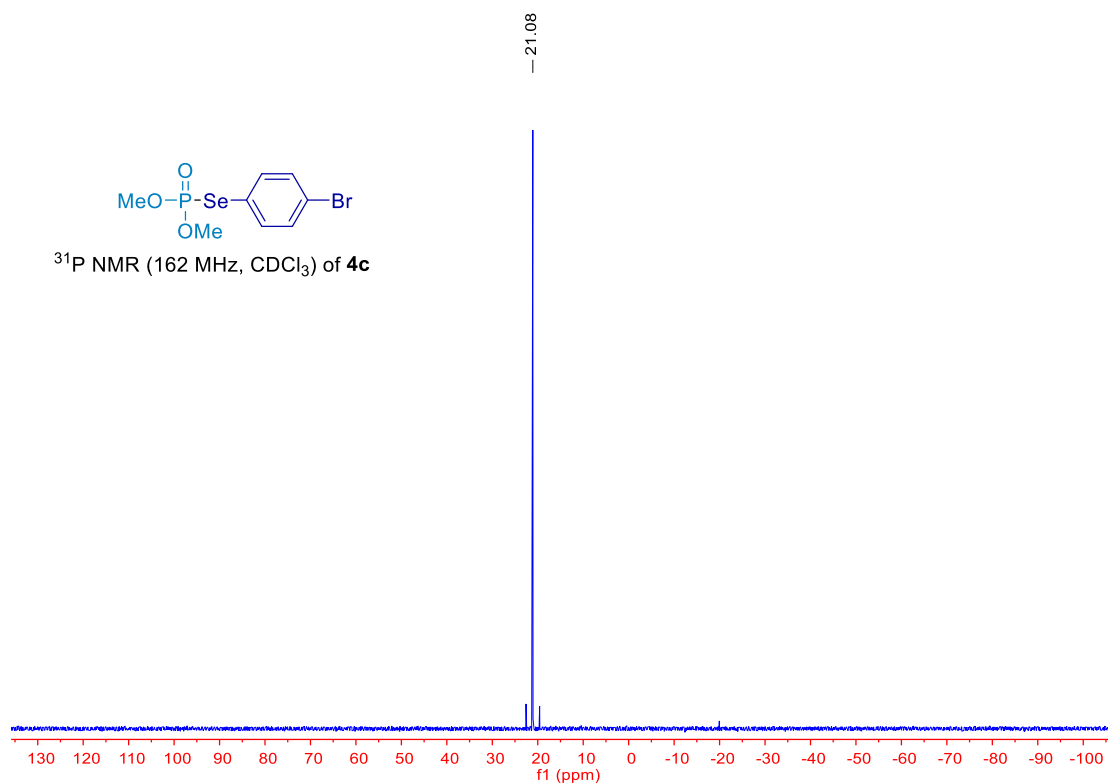

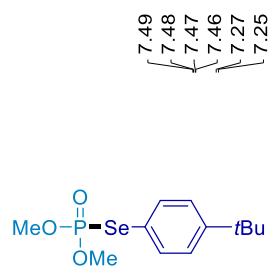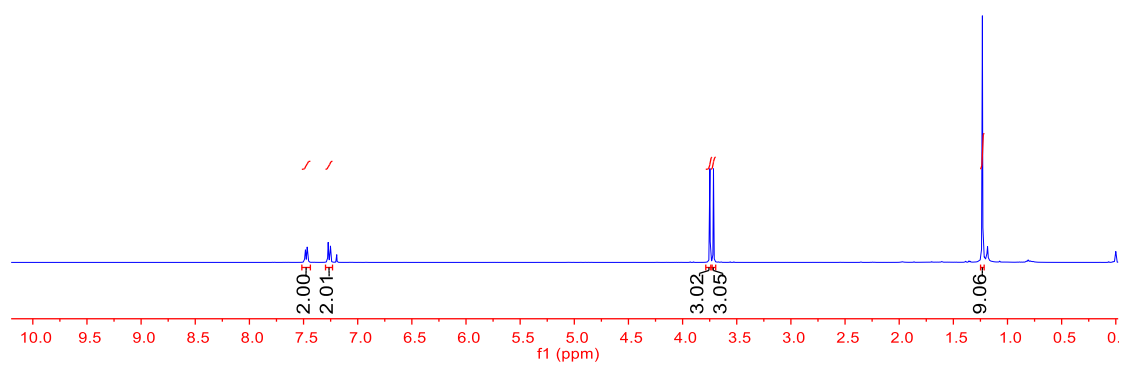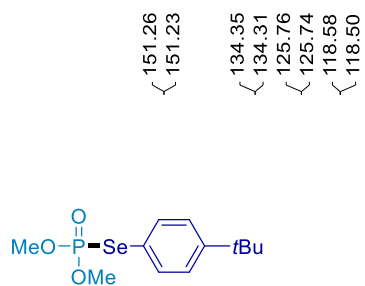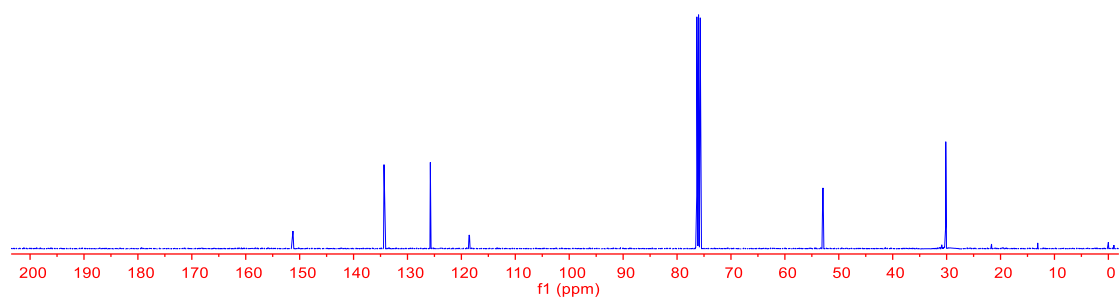

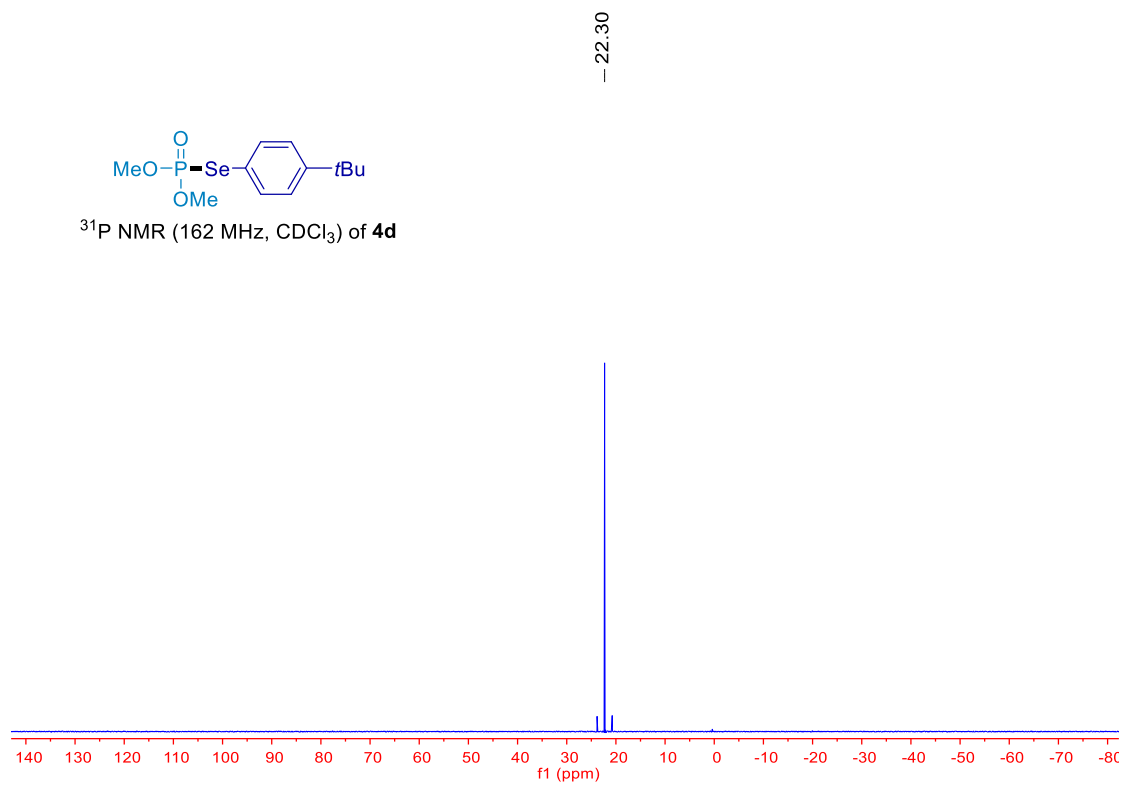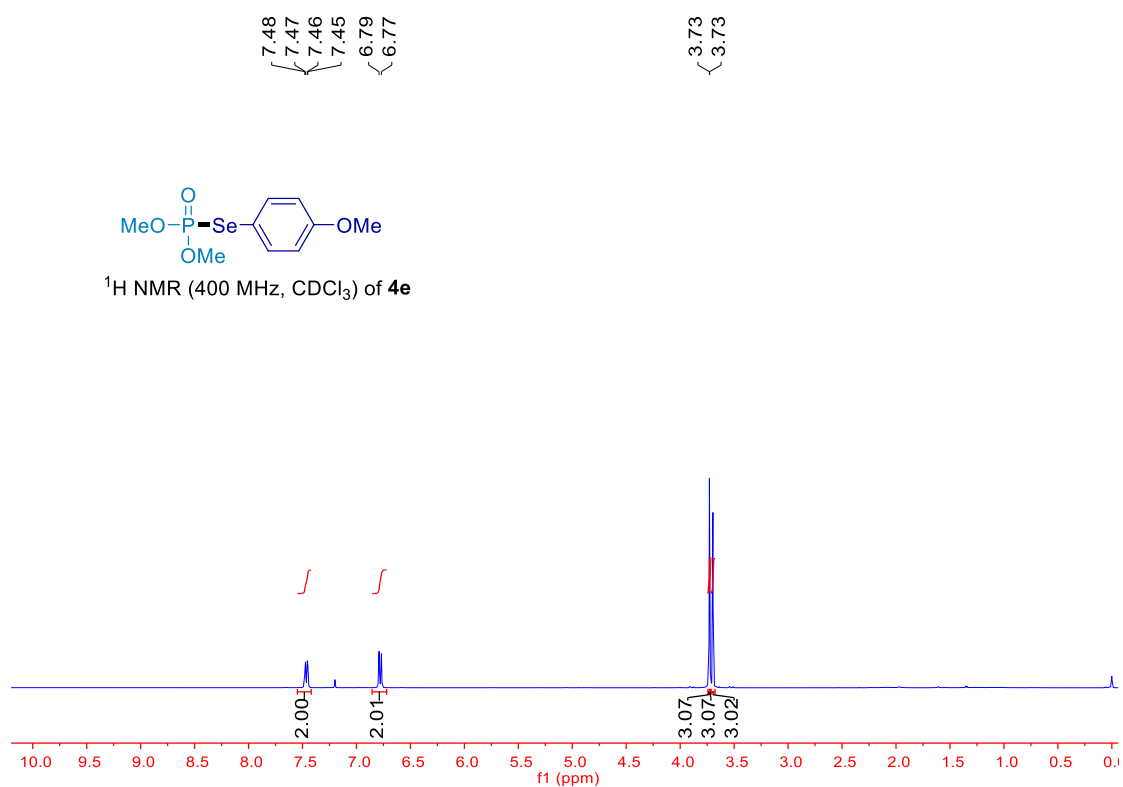

159.43  
159.40

136.35  
136.30

114.30  
114.28  
112.06  
111.97

54.28  
52.96  
52.90

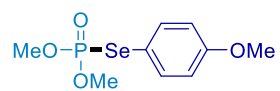

$^{13}\text{C}$  { $^1\text{H}$ } NMR (100 MHz,  $\text{CDCl}_3$ ) of **4e**

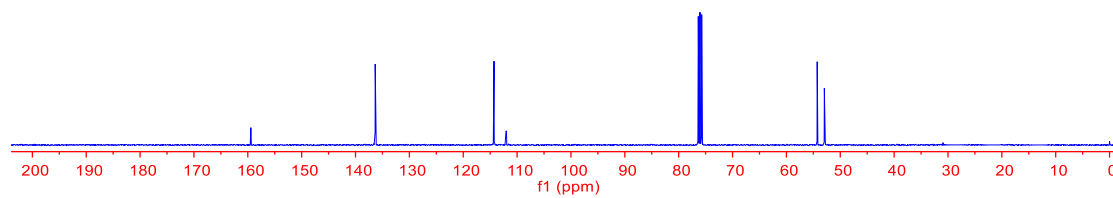

- 22.23

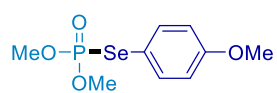

$^{31}\text{P}$  NMR (162 MHz,  $\text{CDCl}_3$ ) of **4e**

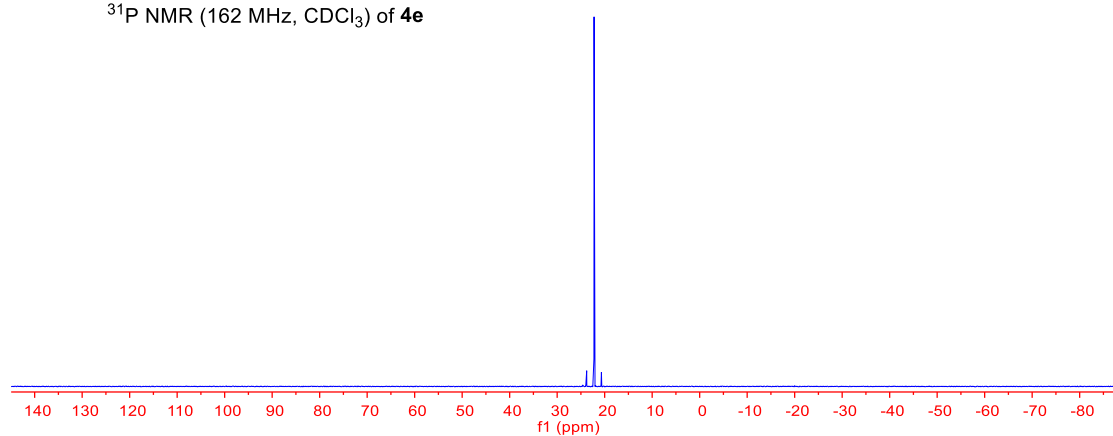

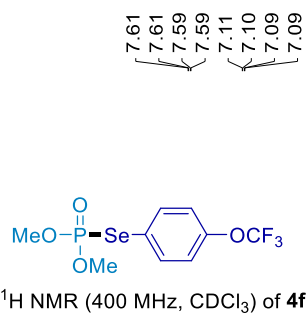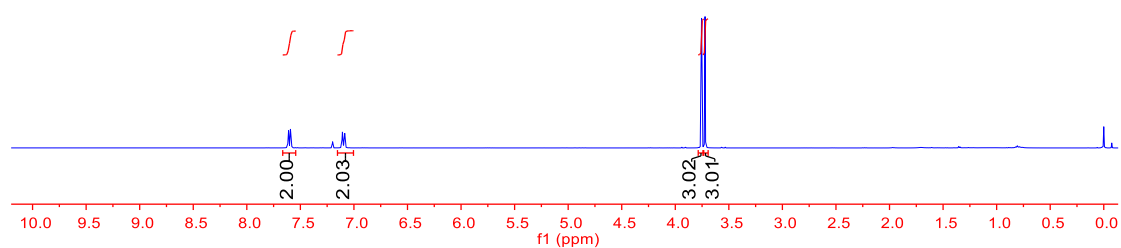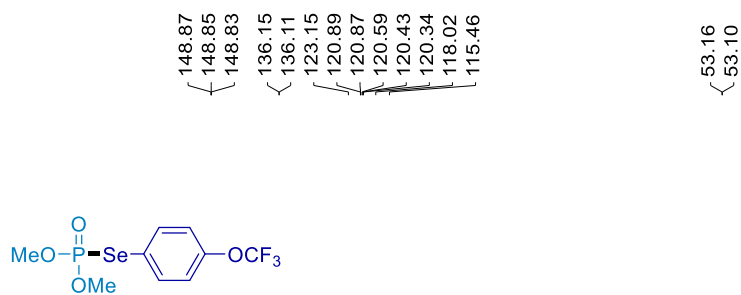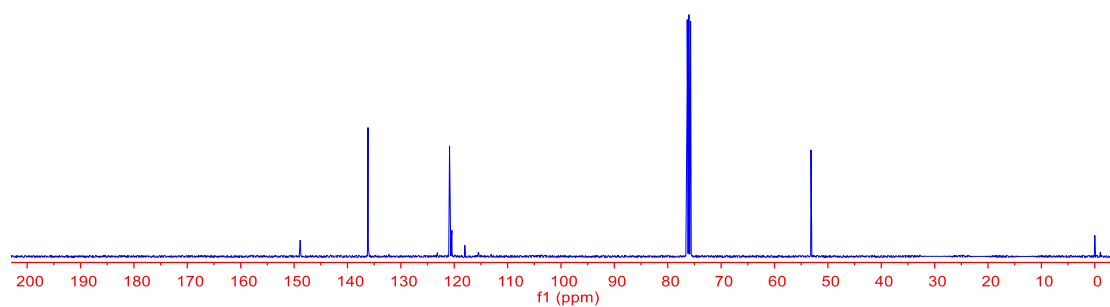

— 21.01

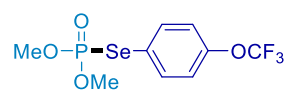

$^{31}\text{P}$  NMR (162 MHz,  $\text{CDCl}_3$ ) of **4f**

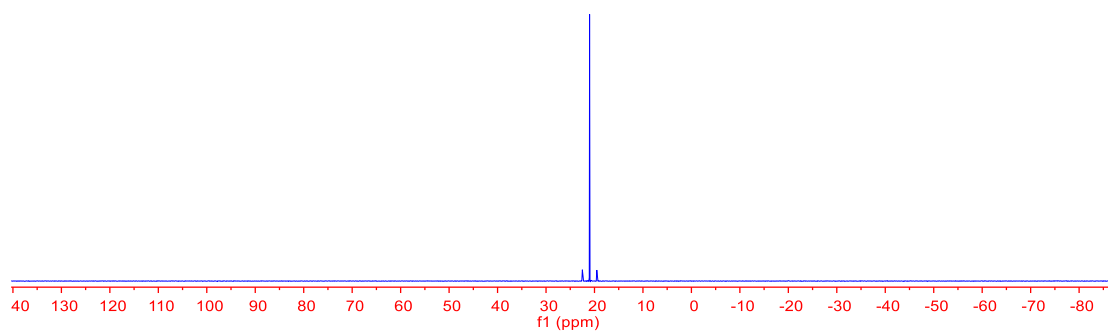

— -57.85

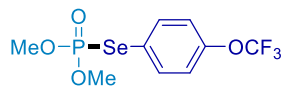

$^{19}\text{F}$  NMR (376 MHz,  $\text{CDCl}_3$ ) of **4f**

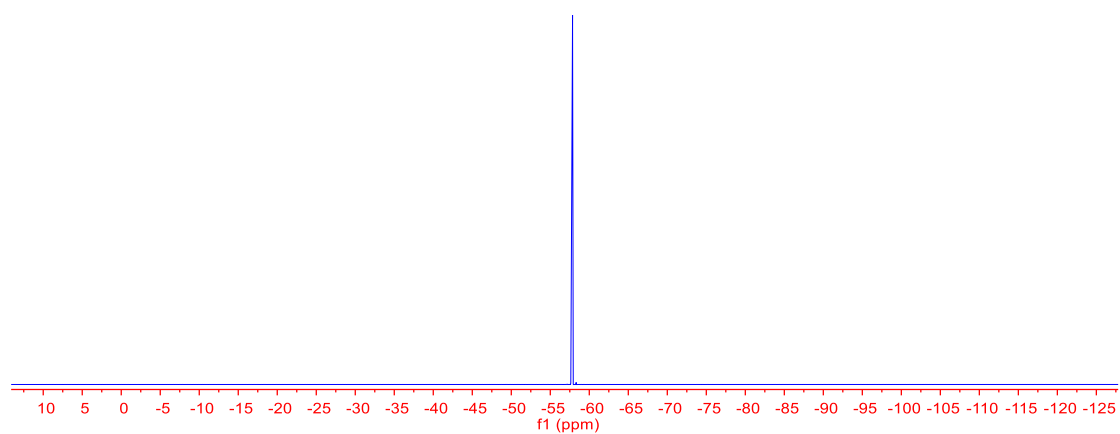

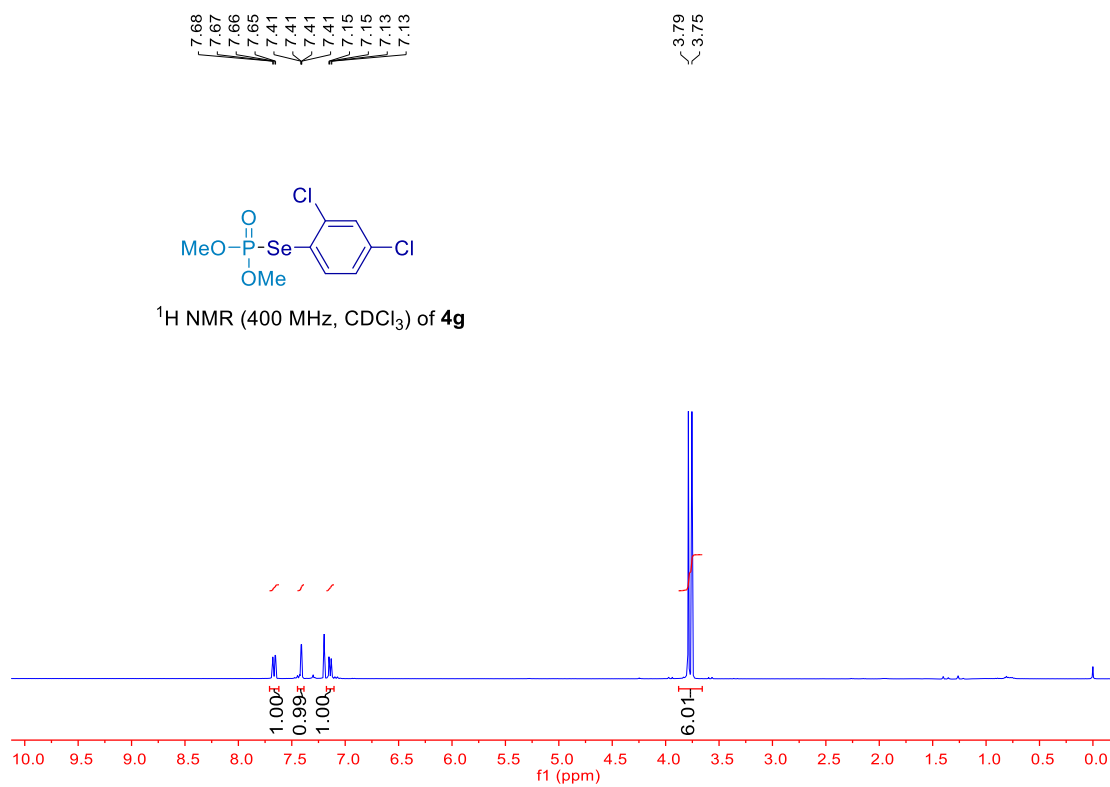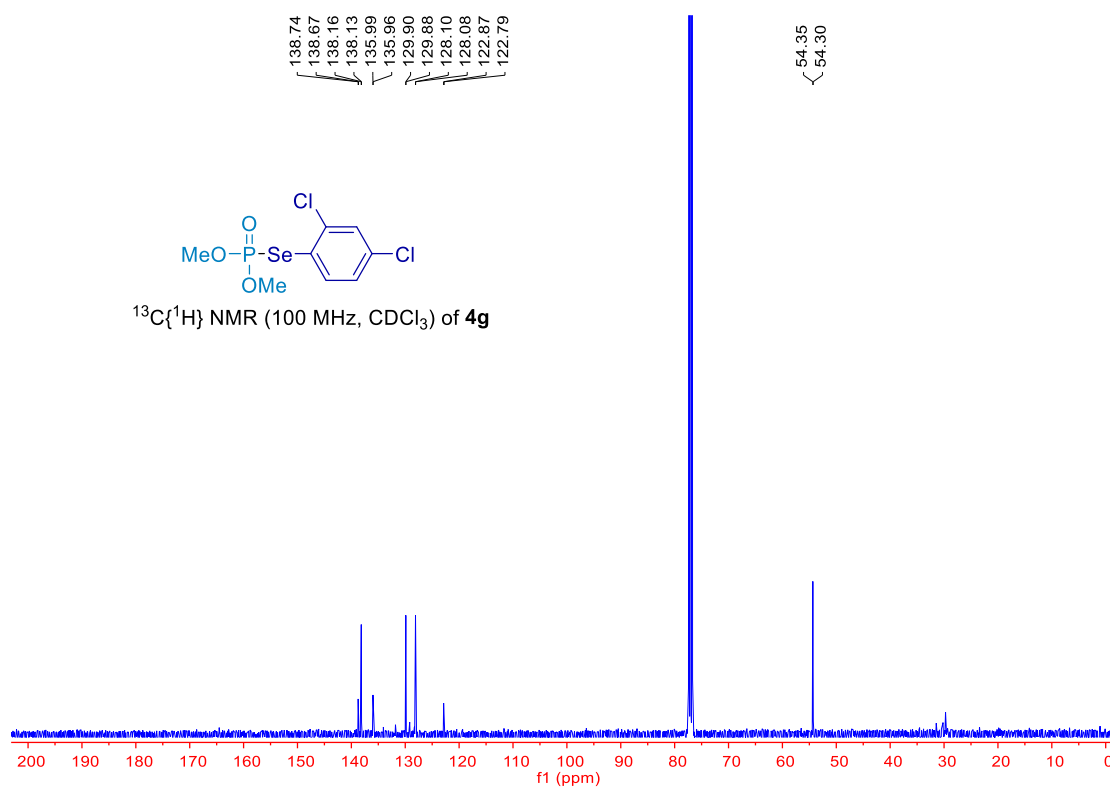

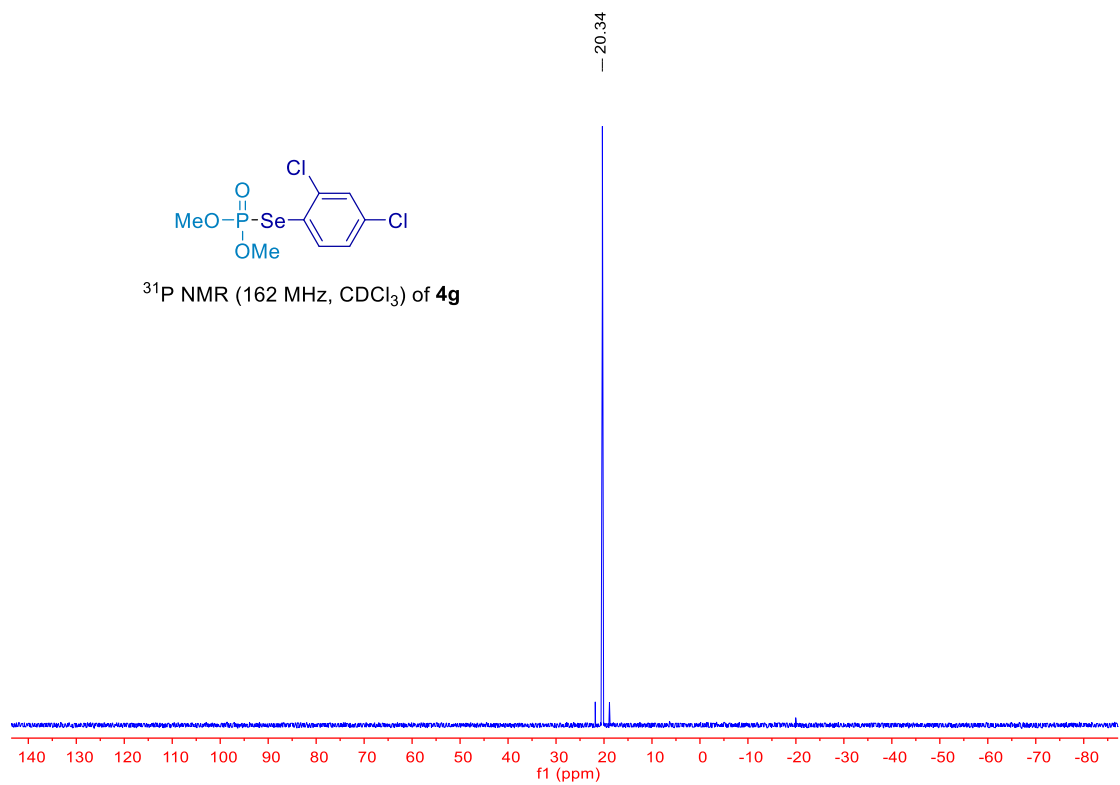

8.39  
8.37  
7.91  
7.91  
7.90  
7.90  
7.89  
7.89  
7.83  
7.83  
7.81  
7.81  
7.81  
7.80  
7.78  
7.78  
7.78  
7.76  
7.76  
7.55  
7.54  
7.53  
7.53  
7.52  
7.51  
7.51  
7.47  
7.47  
7.45  
7.45  
7.43  
7.43  
7.36  
7.34  
7.32  
3.66  
3.63

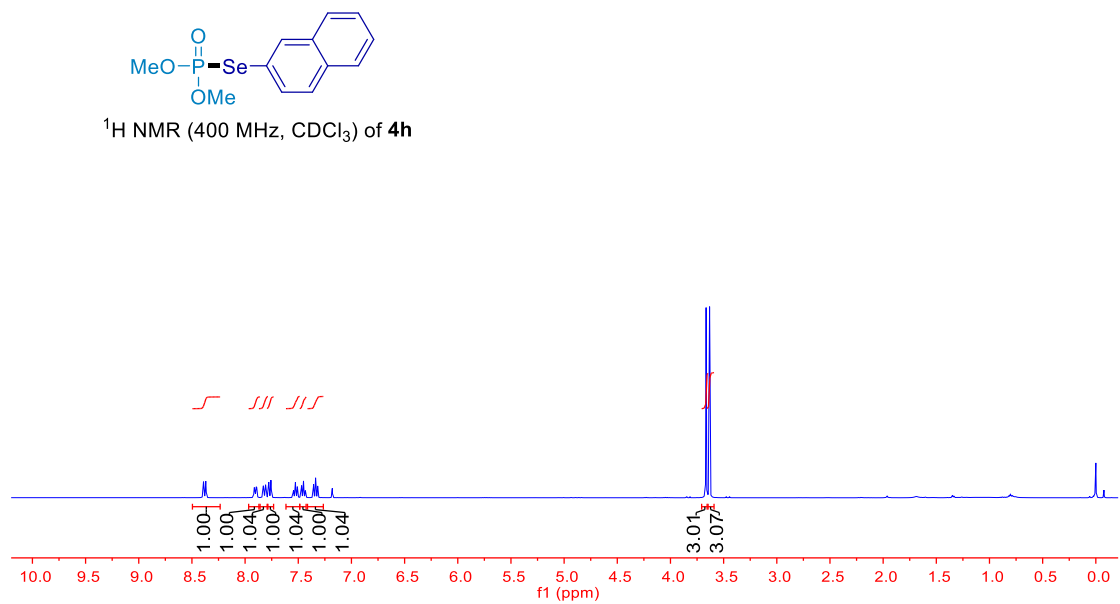

1.00  
1.00  
1.04  
1.00  
1.04  
1.00  
1.04



135.56  
135.51  
133.90  
133.87  
133.24  
133.22  
129.40  
129.37  
127.65  
126.89  
126.16  
125.46  
124.95  
124.92  
121.61  
121.52

53.10  
53.04

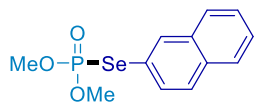

$^{13}\text{C}$  { $^1\text{H}$ } NMR (100 MHz,  $\text{CDCl}_3$ ) of **4h**

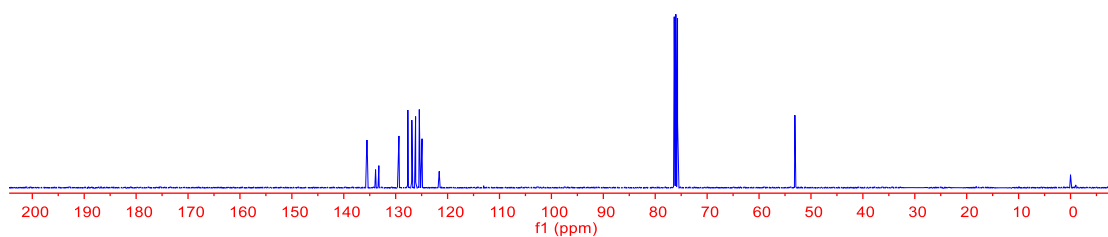

-21.05

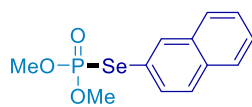

$^{31}\text{P}$  NMR (162 MHz,  $\text{CDCl}_3$ ) of **4h**

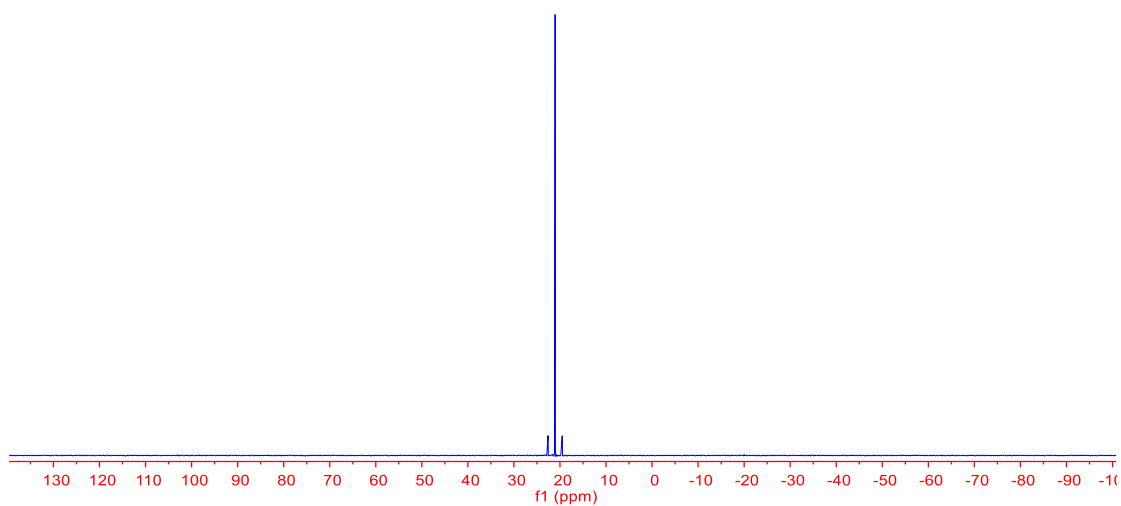

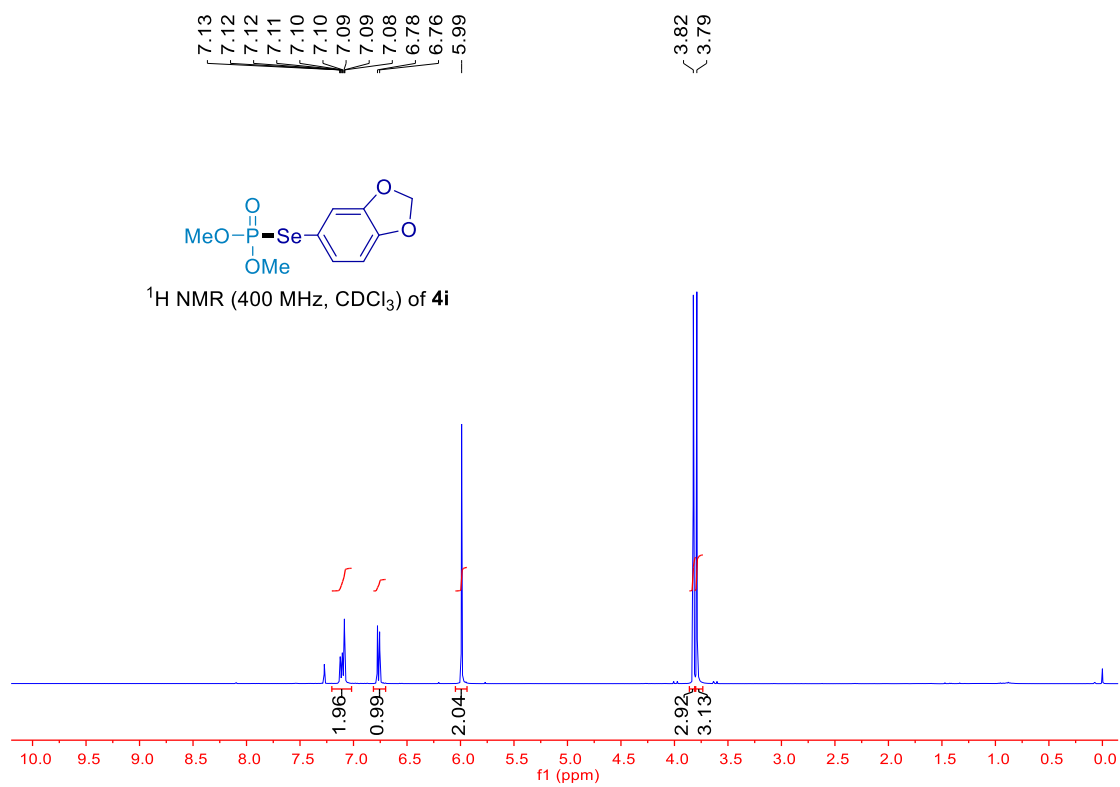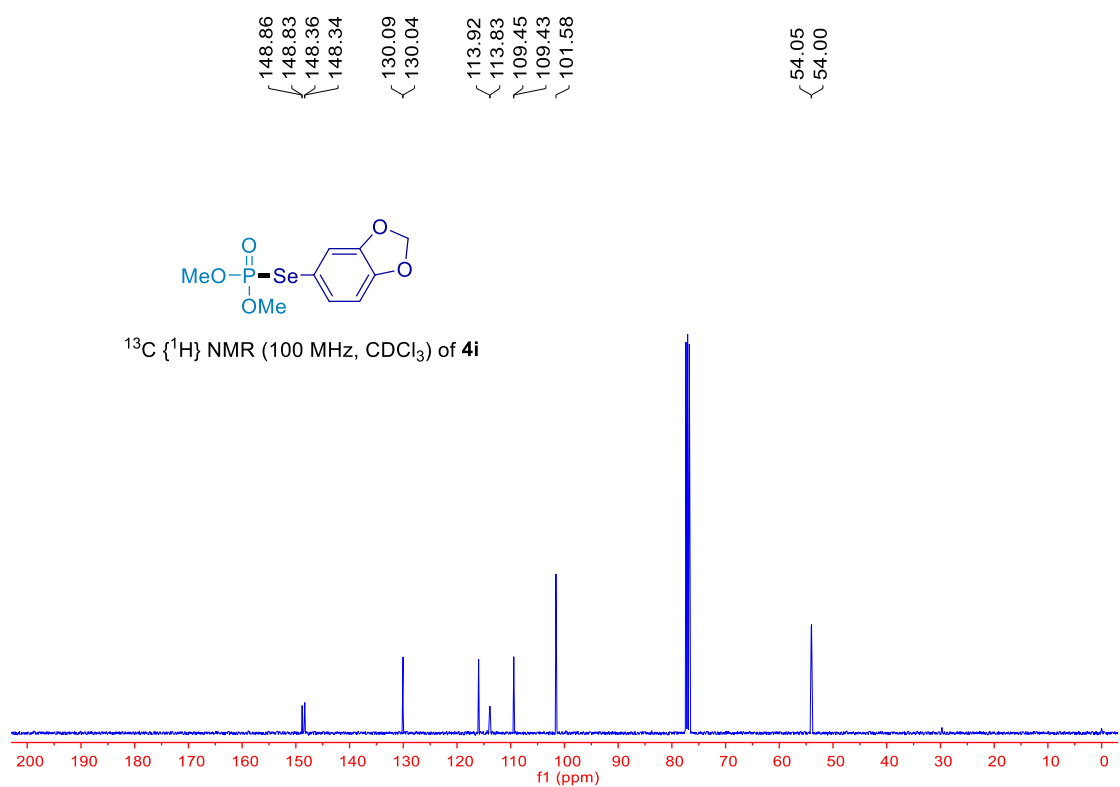

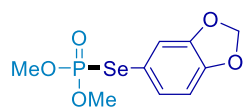

$^{31}\text{P}$  NMR (162 MHz,  $\text{CDCl}_3$ ) of **4i**

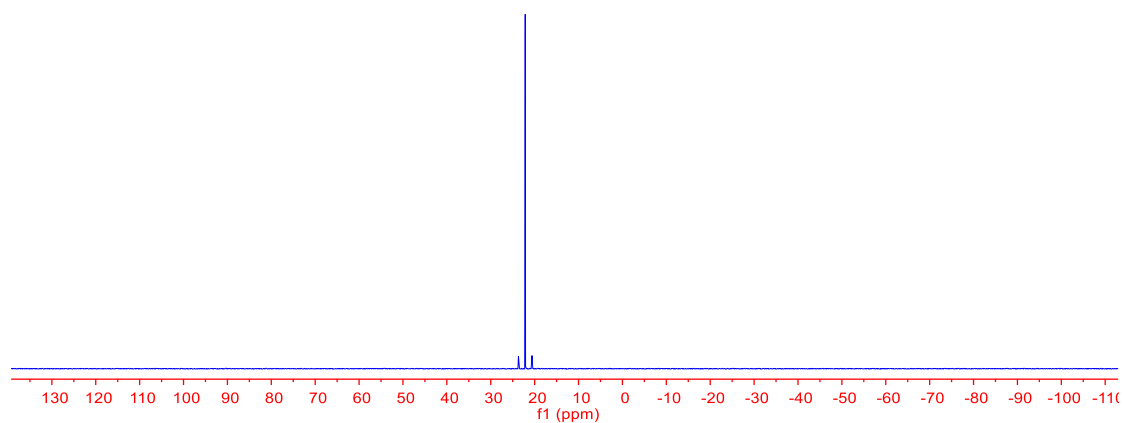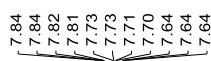

$^1\text{H}$  NMR (400 MHz,  $\text{CDCl}_3$ ) of **4j**

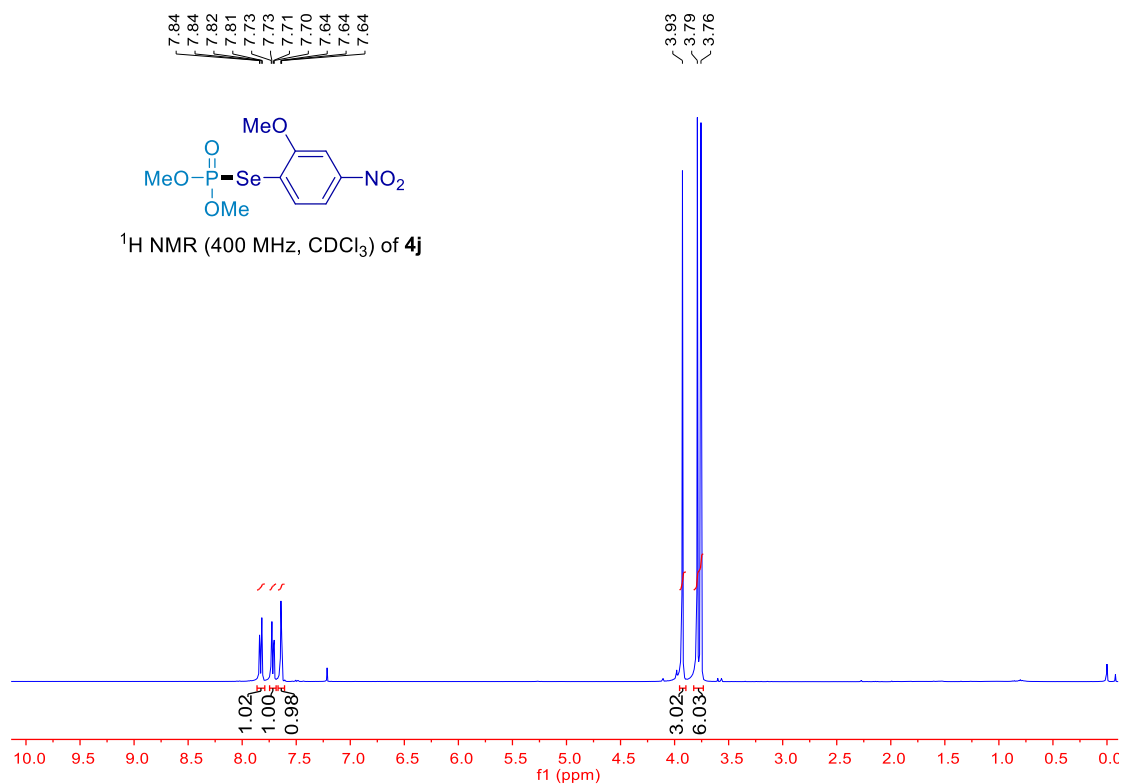

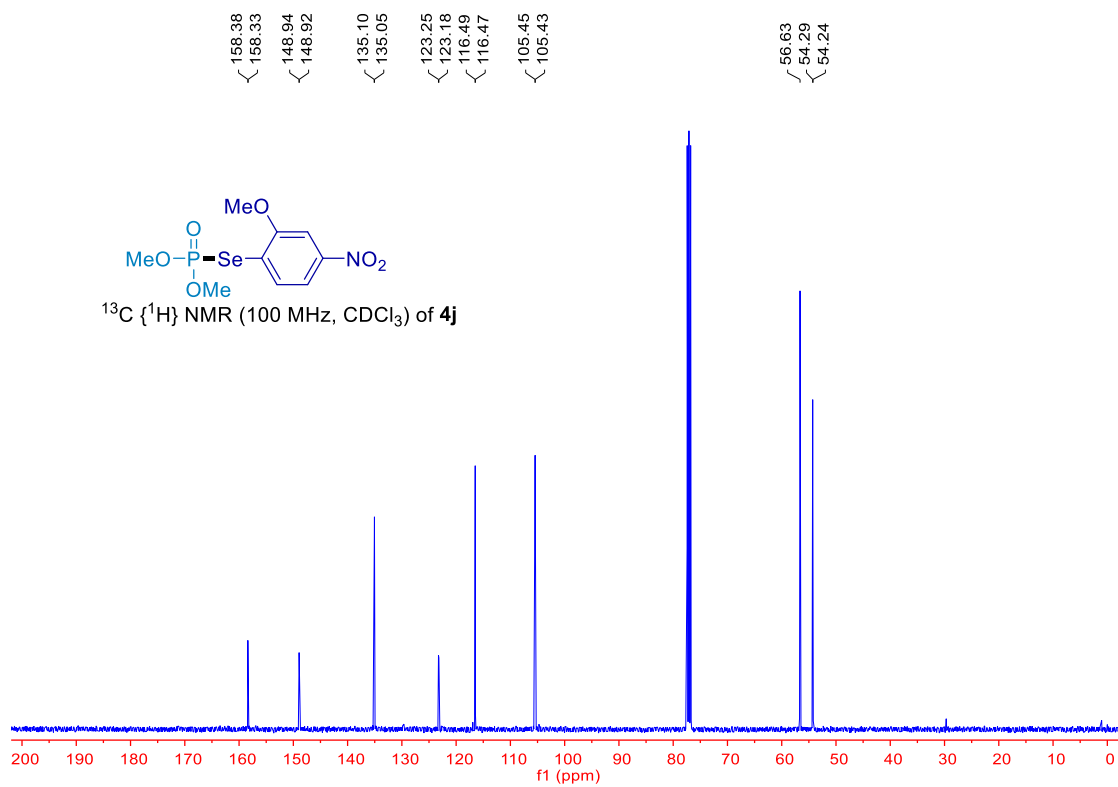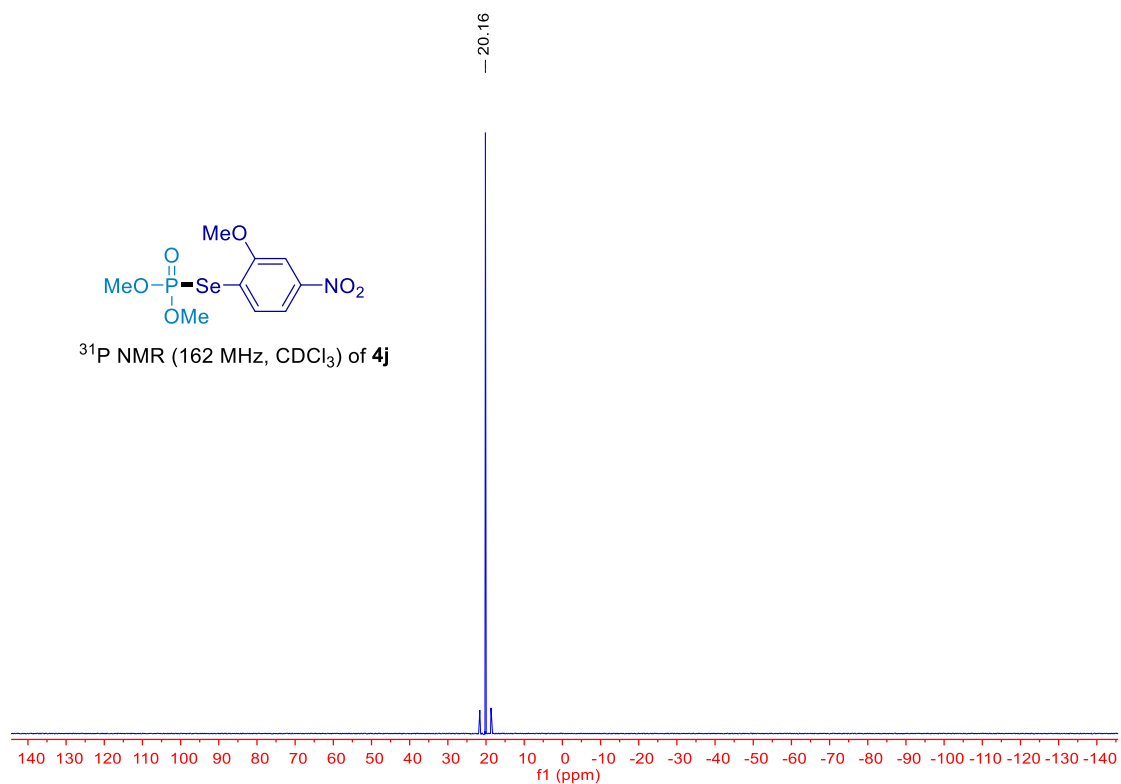

7.30  
7.29  
7.28  
7.25  
7.24  
7.22  
7.20  
7.19  
7.17

4.02  
3.98  
3.63  
3.60

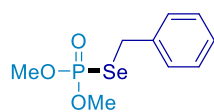

$^1\text{H}$  NMR (400 MHz,  $\text{CDCl}_3$ ) of **5a**

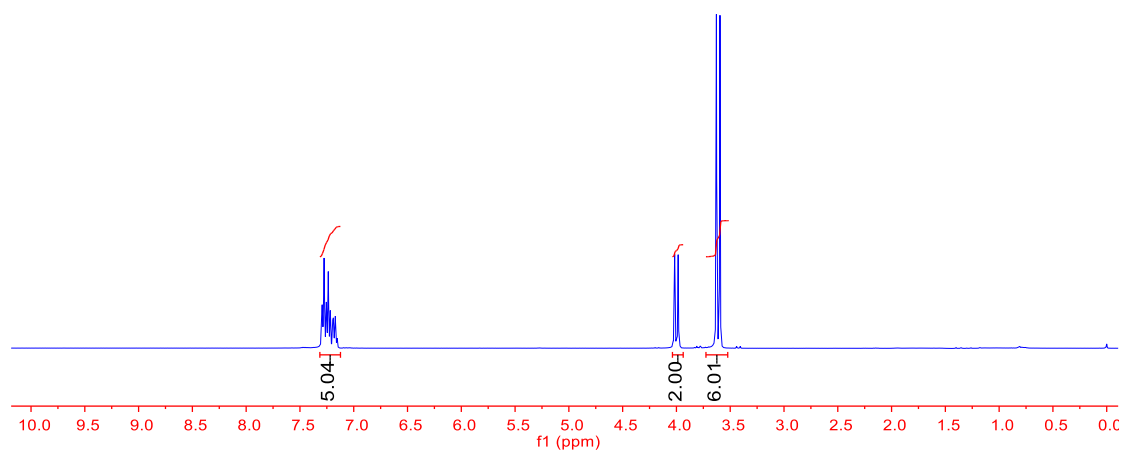

138.28  
138.23  
128.97  
128.69  
127.49

53.57  
53.51

29.46  
29.42

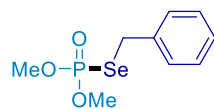

$^{13}\text{C}\{^1\text{H}\}$  NMR (100 MHz,  $\text{CDCl}_3$ ) of **5a**

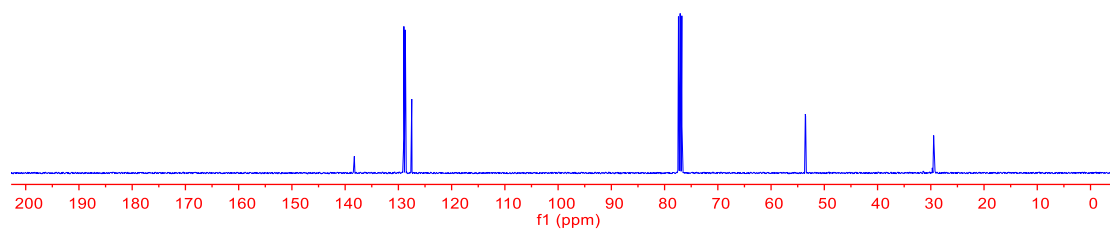

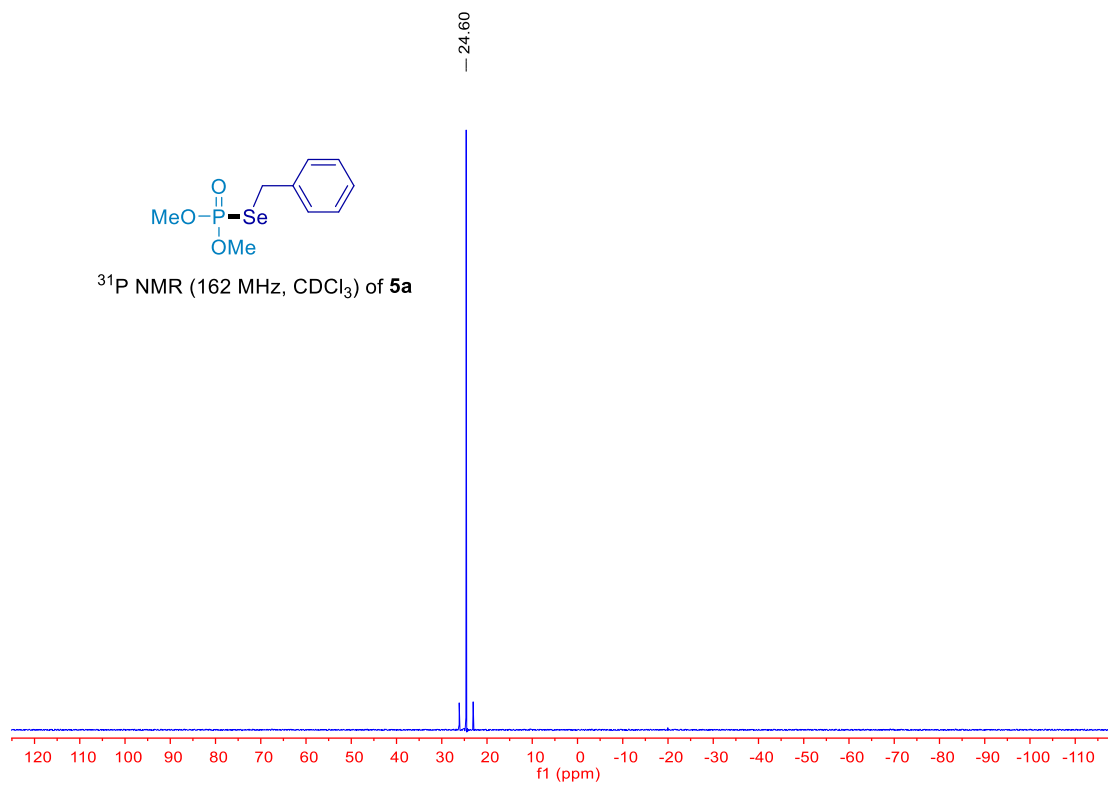

7.28  
7.26  
7.26  
7.24  
6.94  
6.94  
6.93  
6.92  
6.91  
6.90  
6.90

4.00  
3.96  
3.63  
3.60

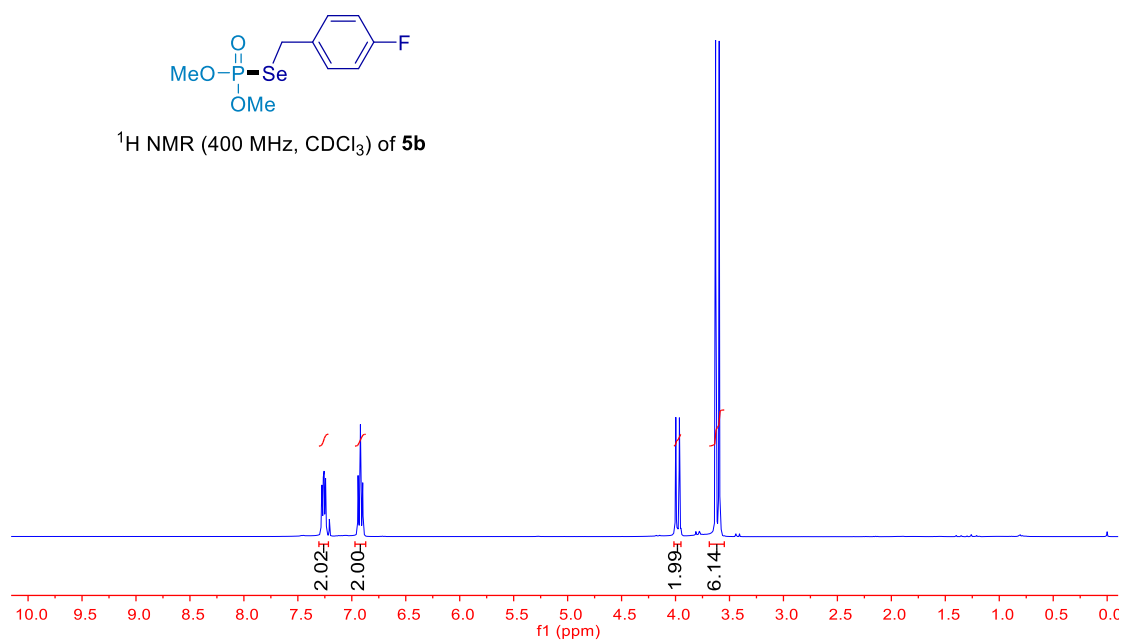

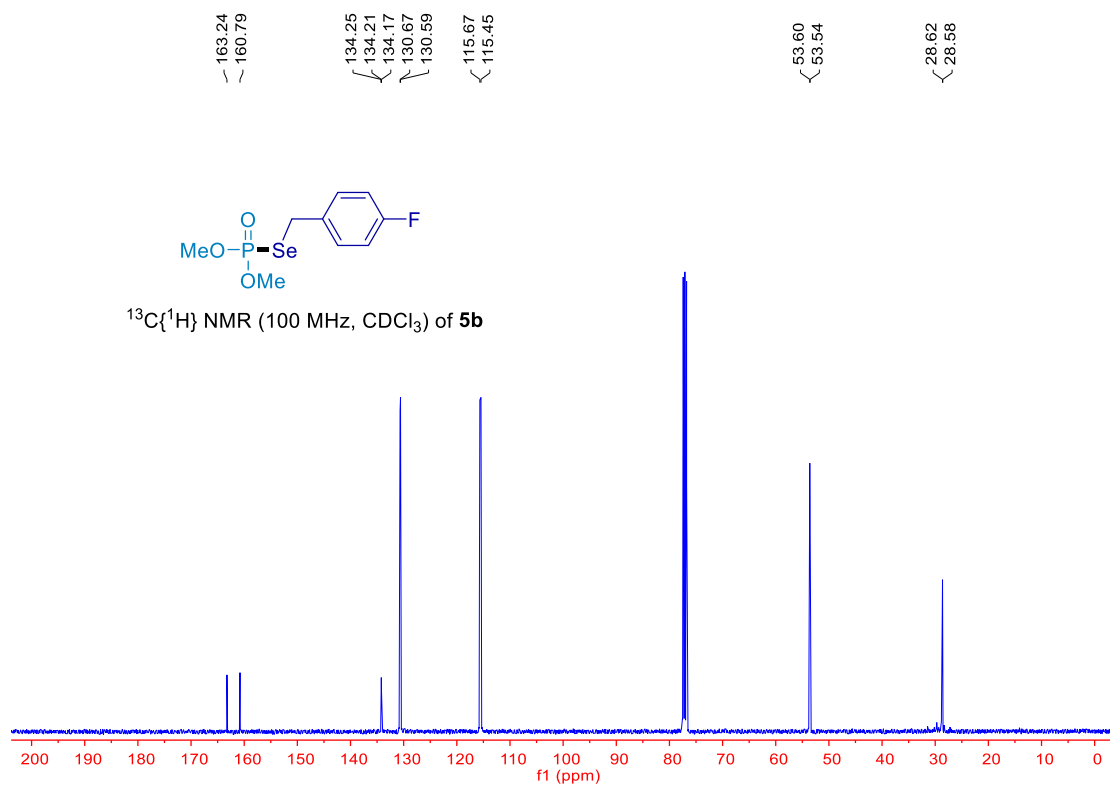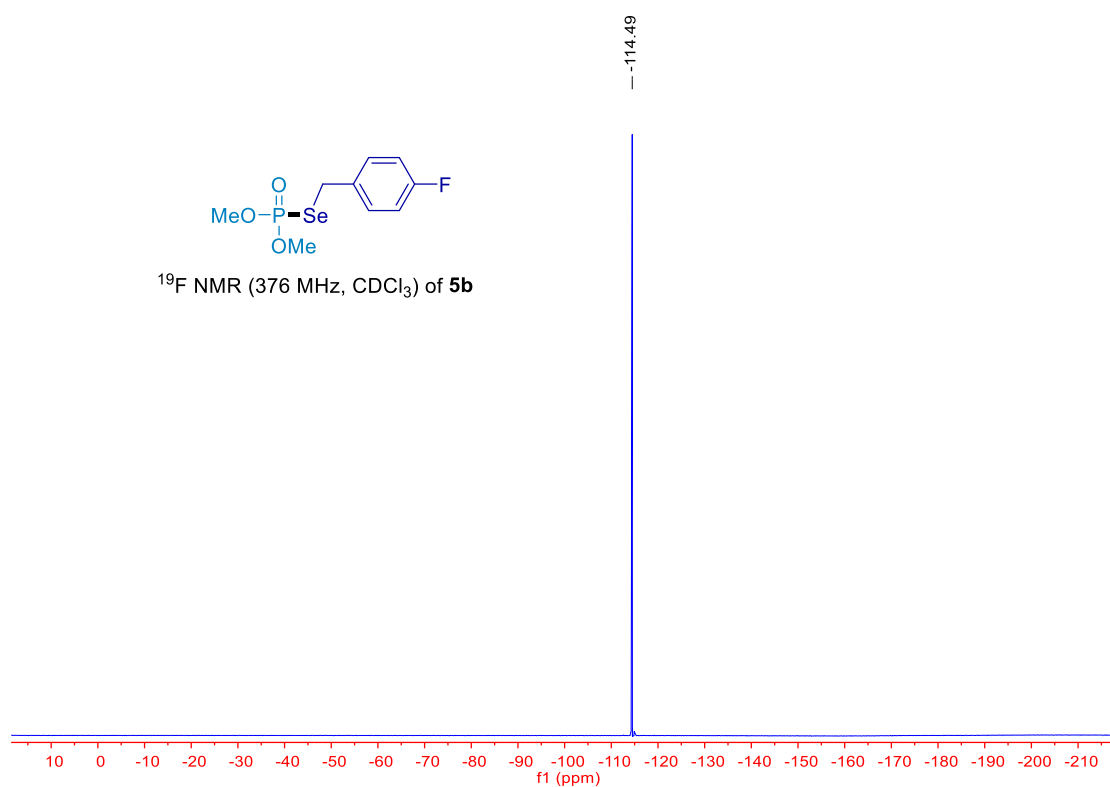

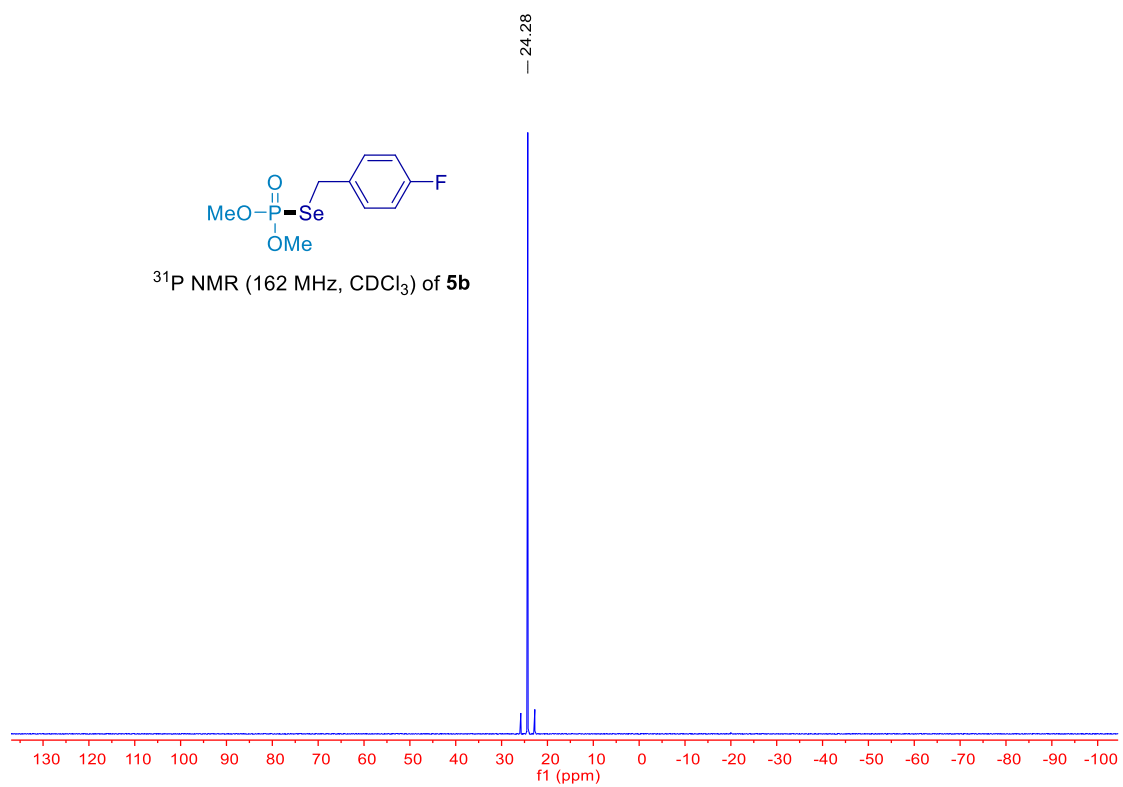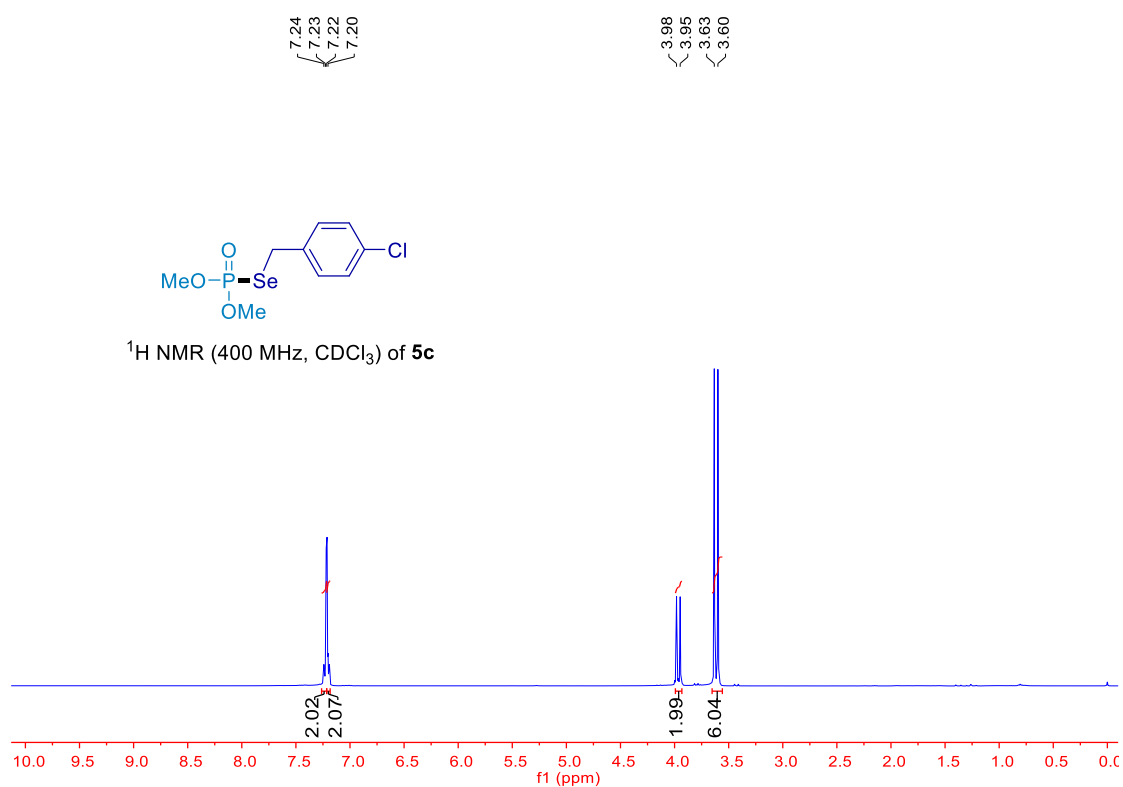



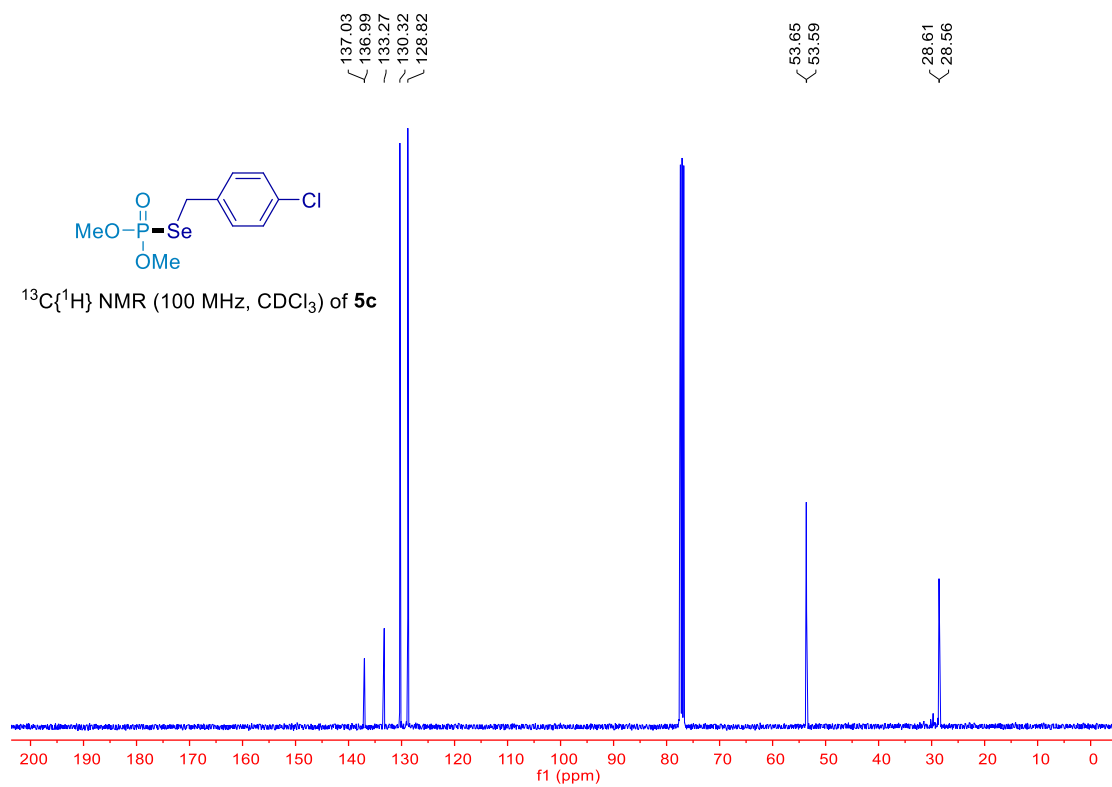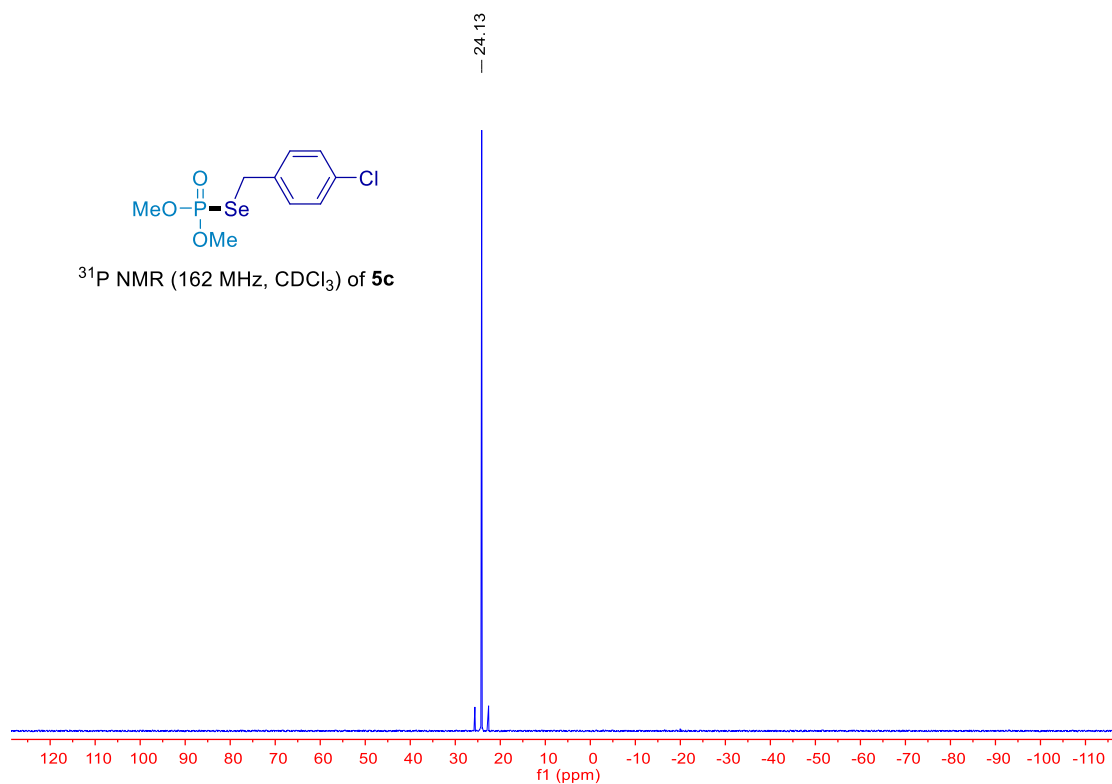

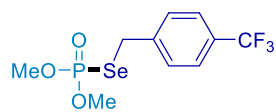

$^1\text{H}$  NMR (400 MHz,  $\text{CDCl}_3$ ) of **5d**

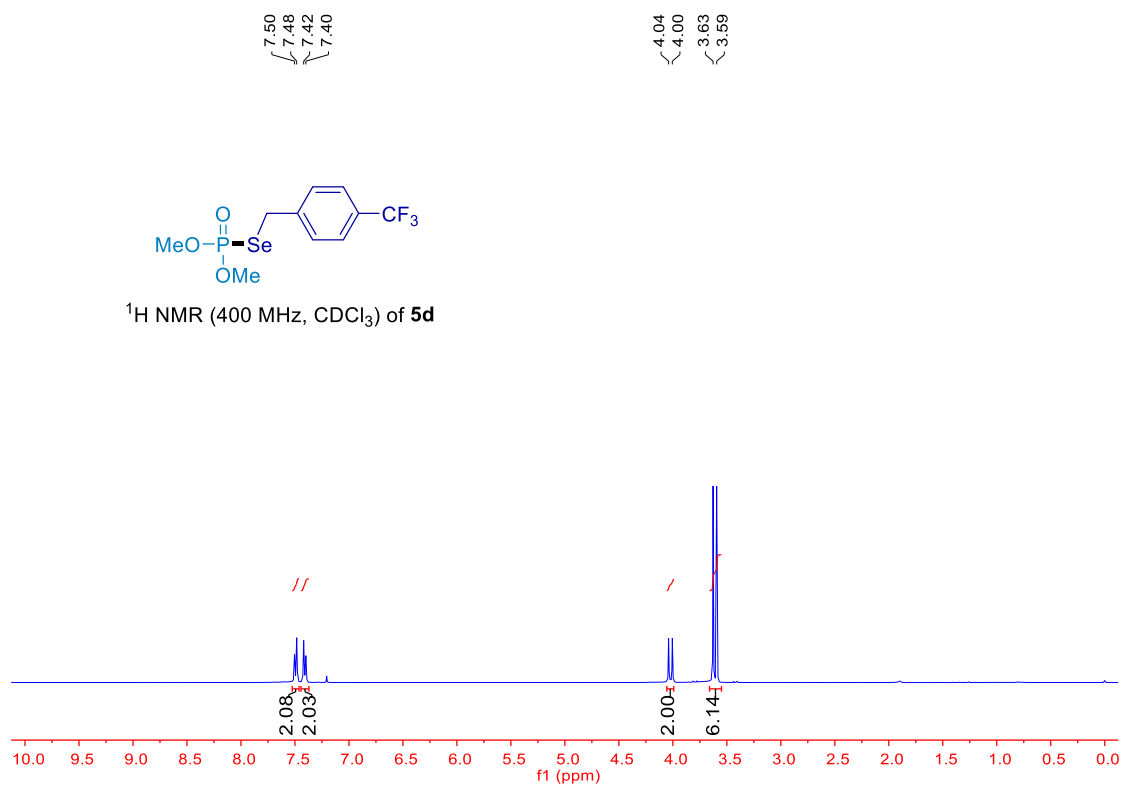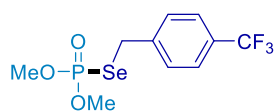

$^{13}\text{C}\{^1\text{H}\}$  NMR (100 MHz,  $\text{CDCl}_3$ ) of **5d**

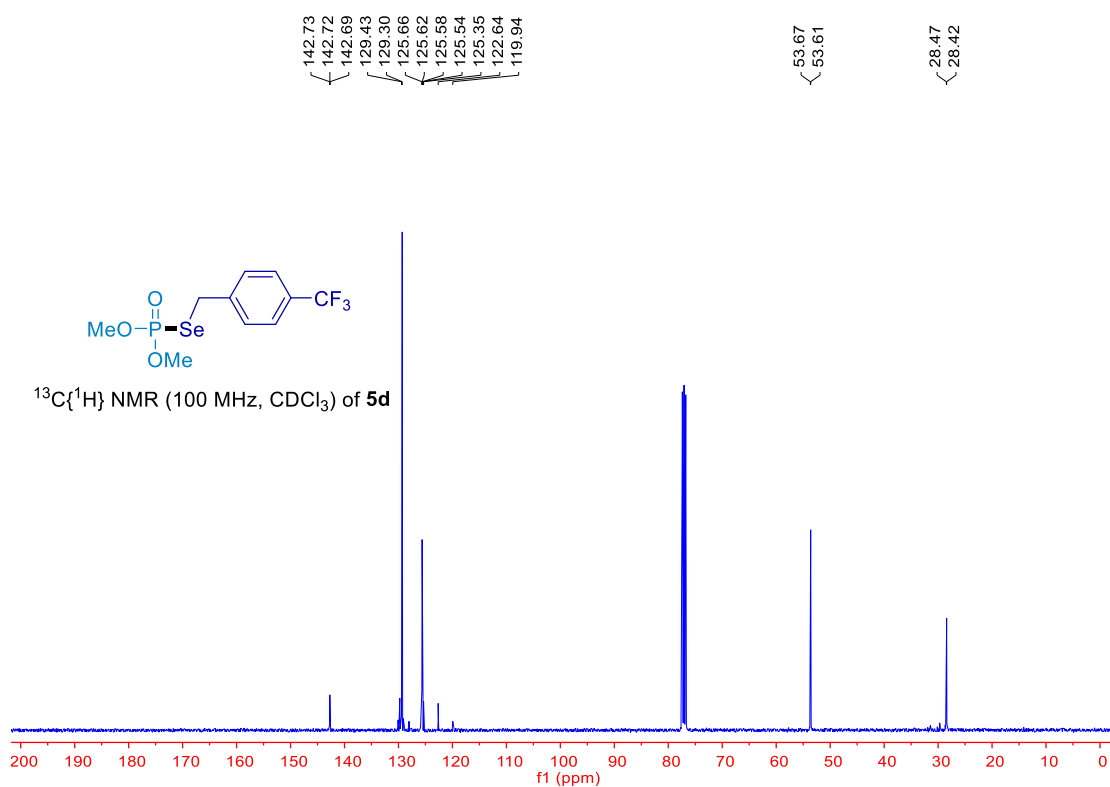

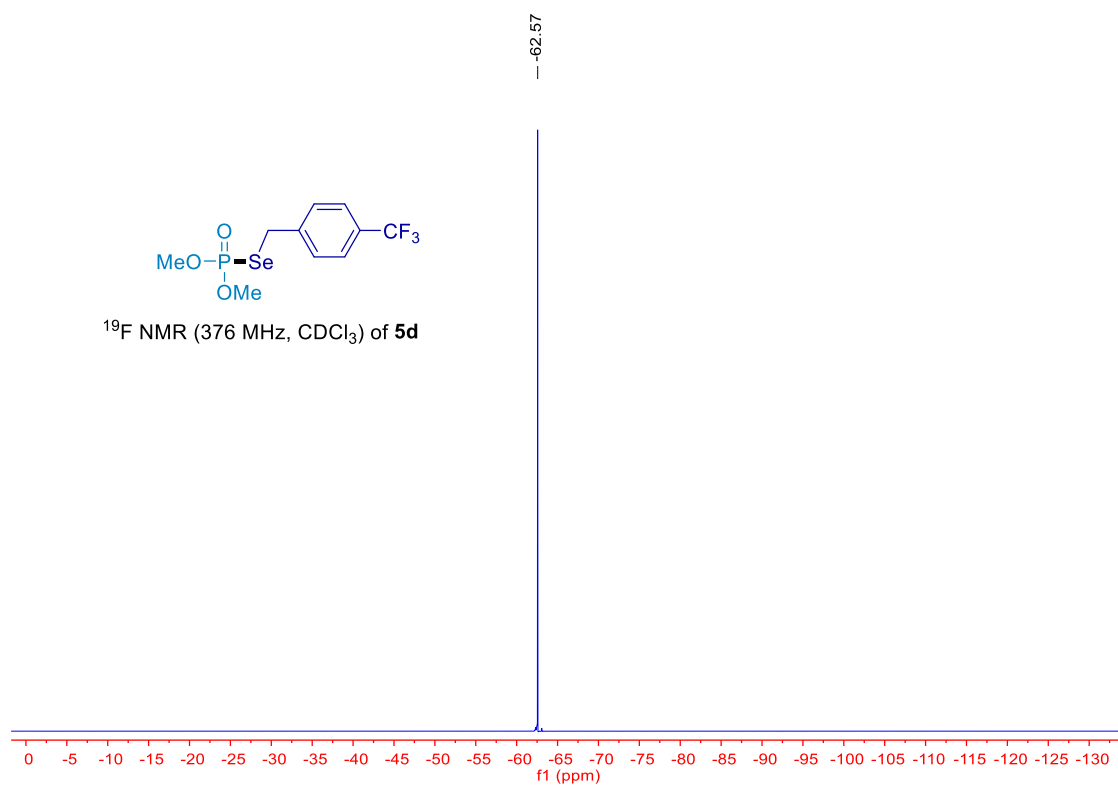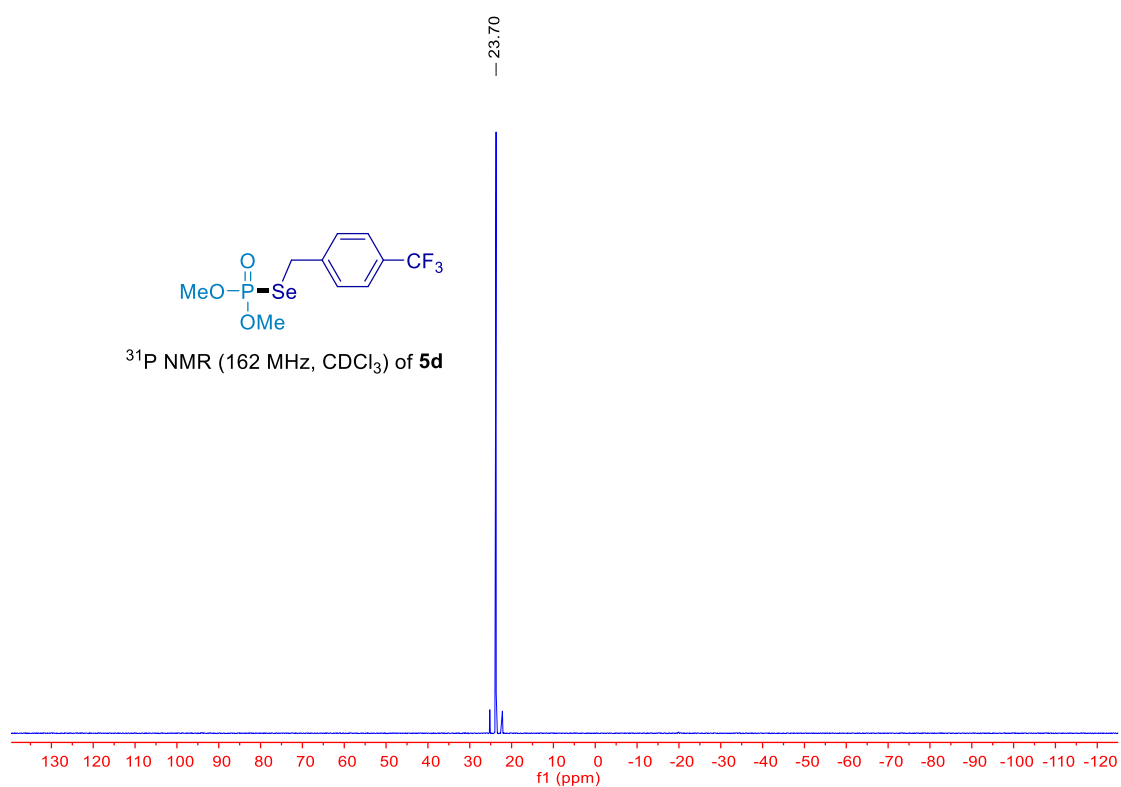

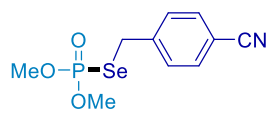

$^1\text{H}$  NMR (400 MHz,  $\text{CDCl}_3$ ) of **5e**

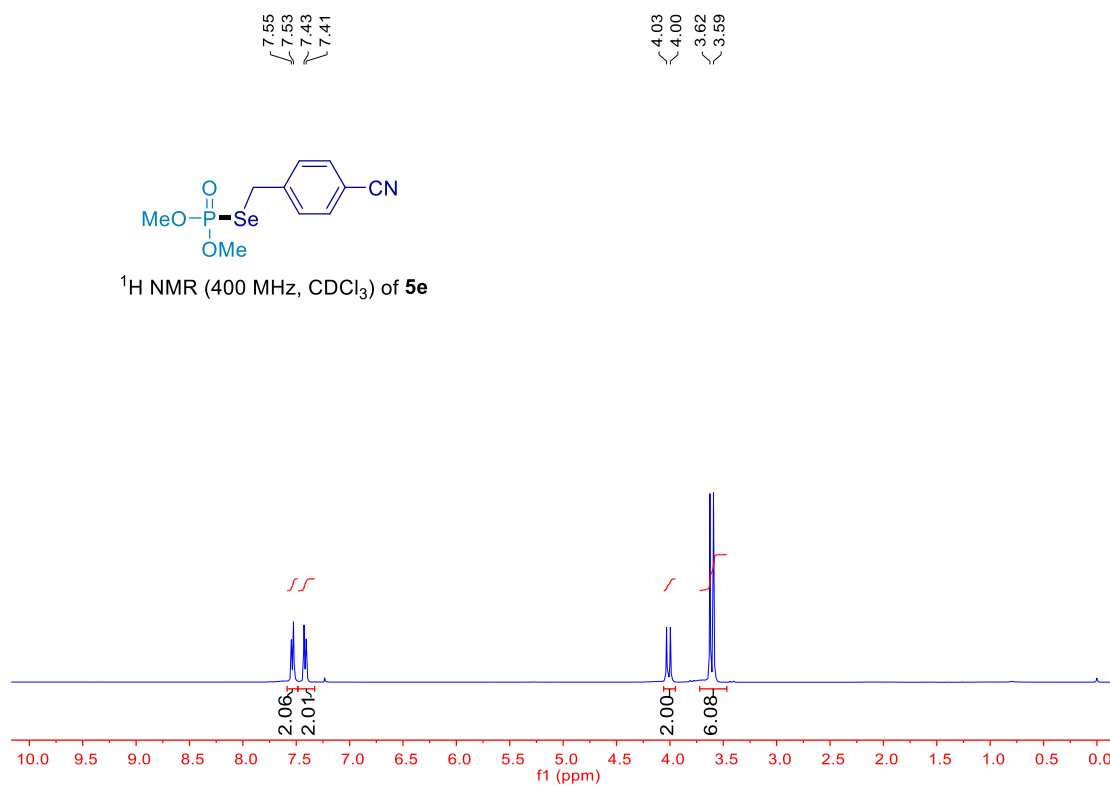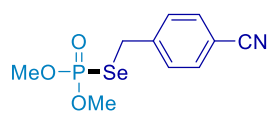

$^{13}\text{C}\{^1\text{H}\}$  NMR (100 MHz,  $\text{CDCl}_3$ ) of **5e**

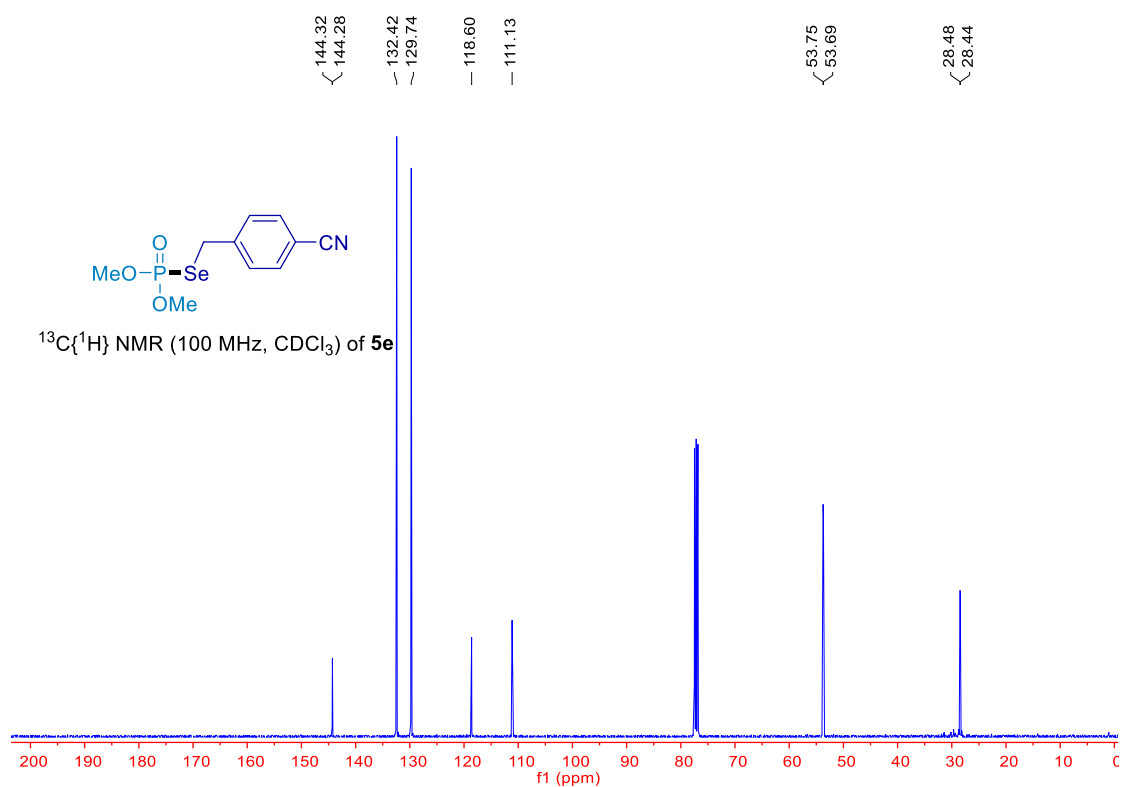

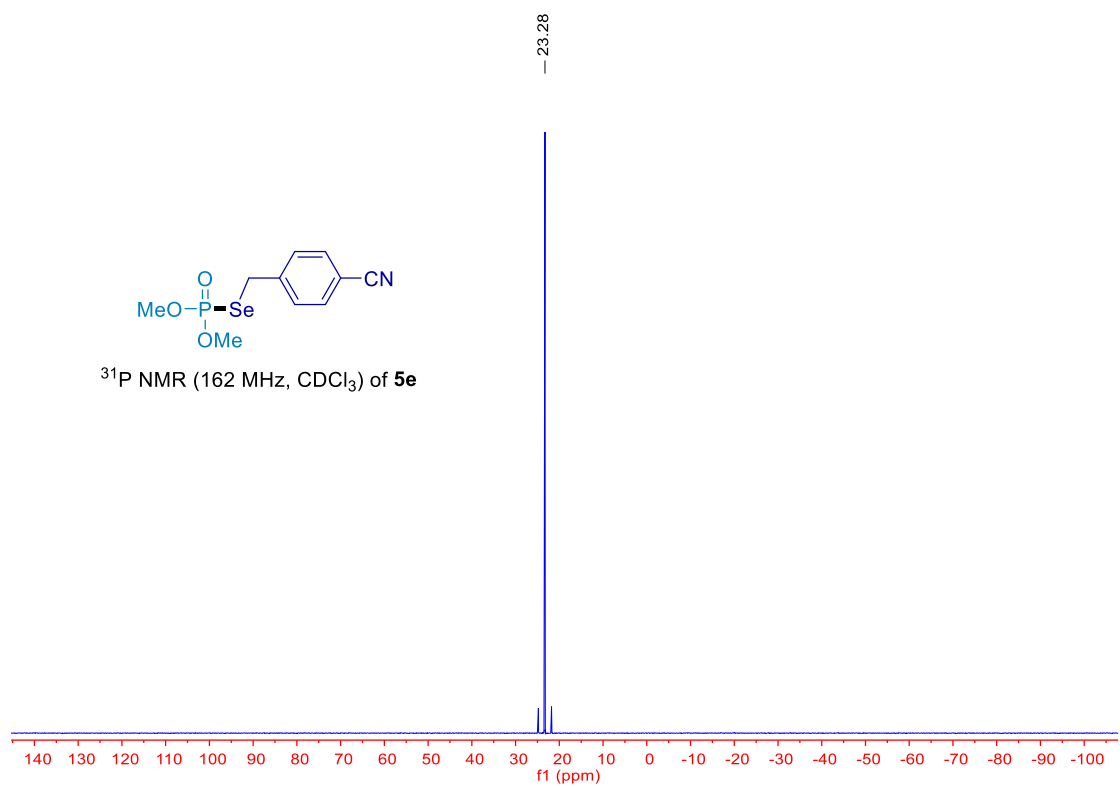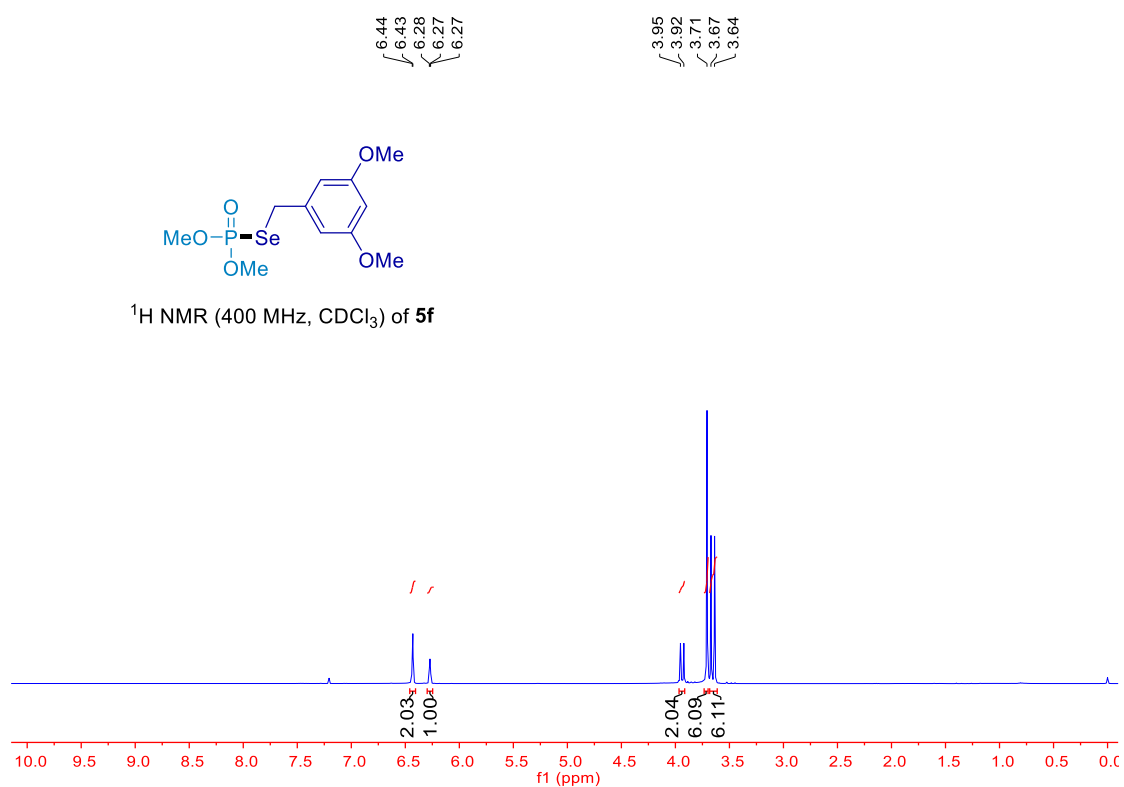

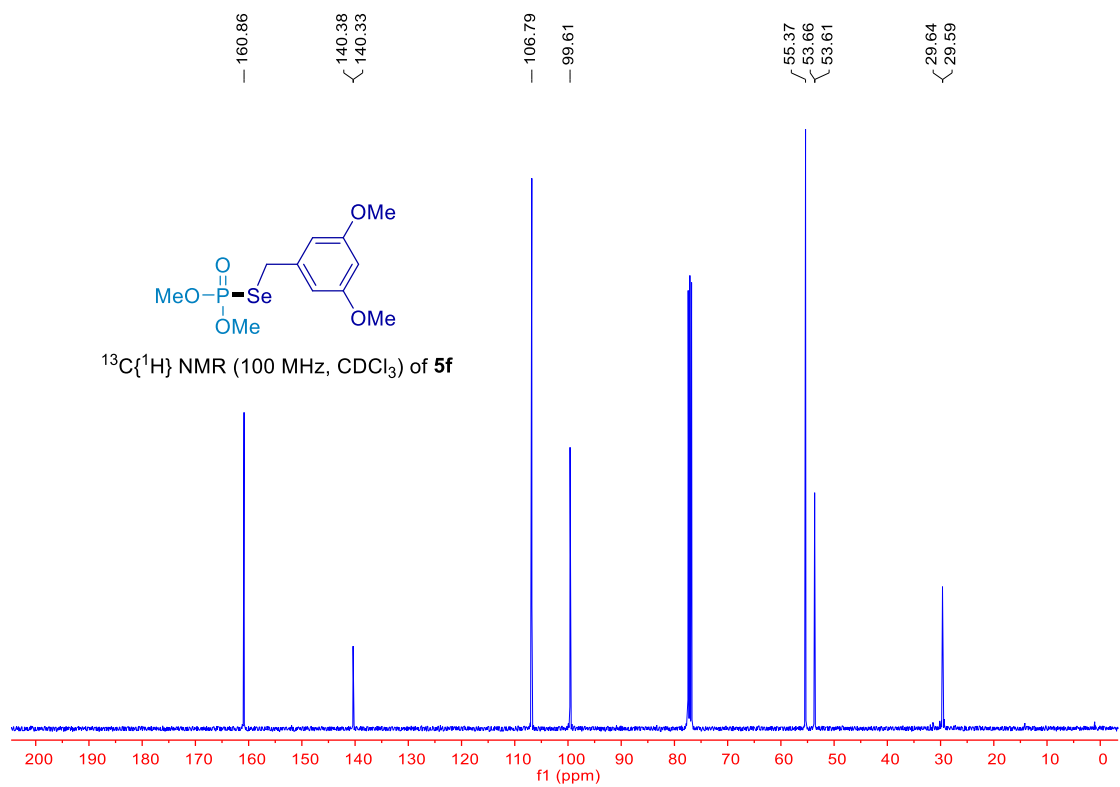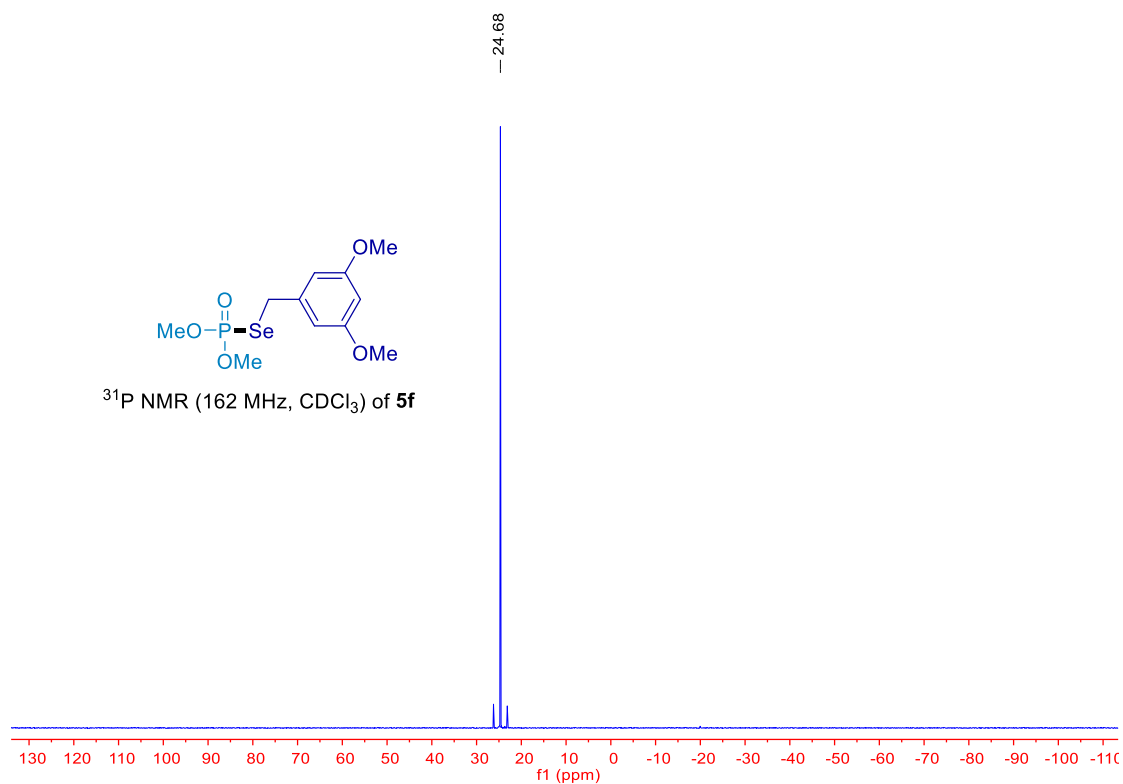

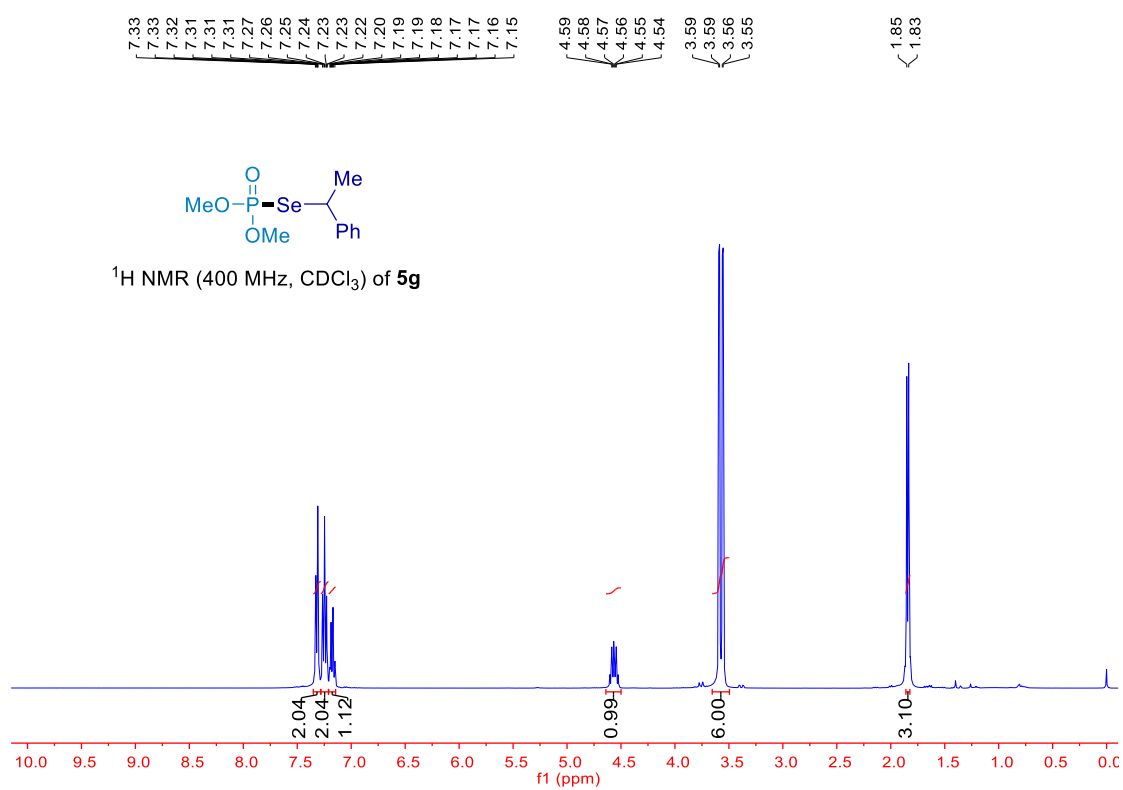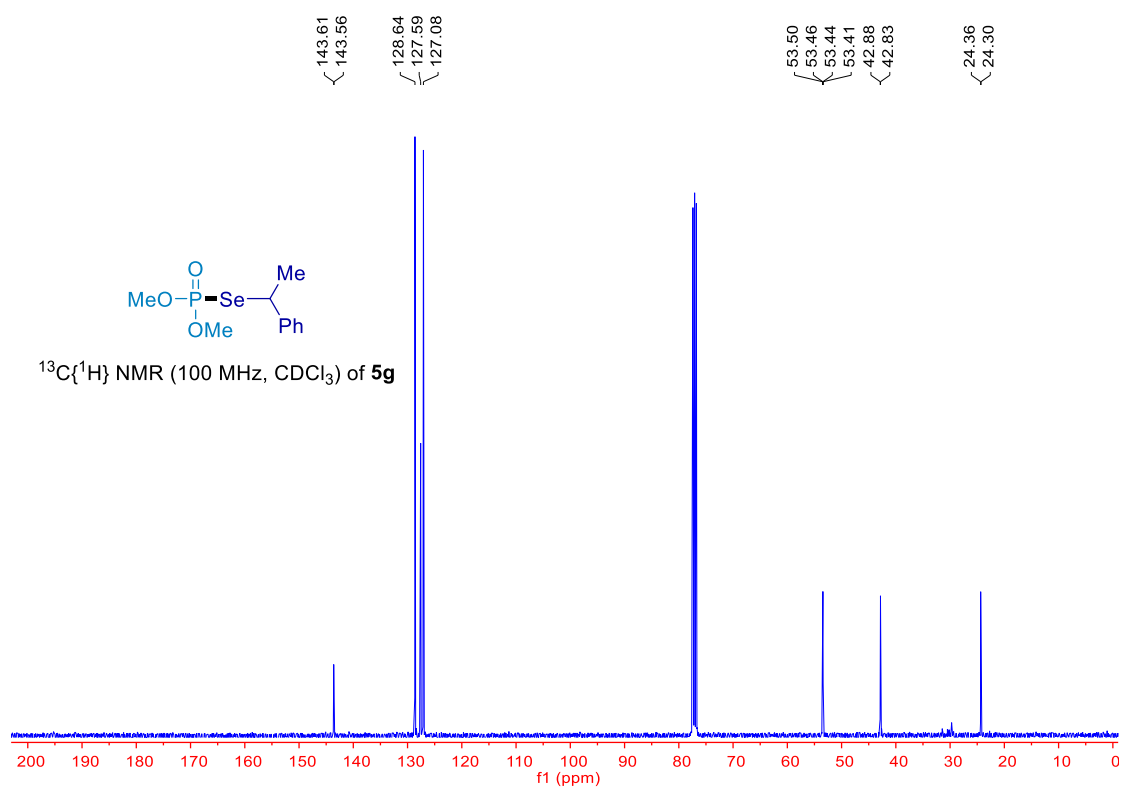

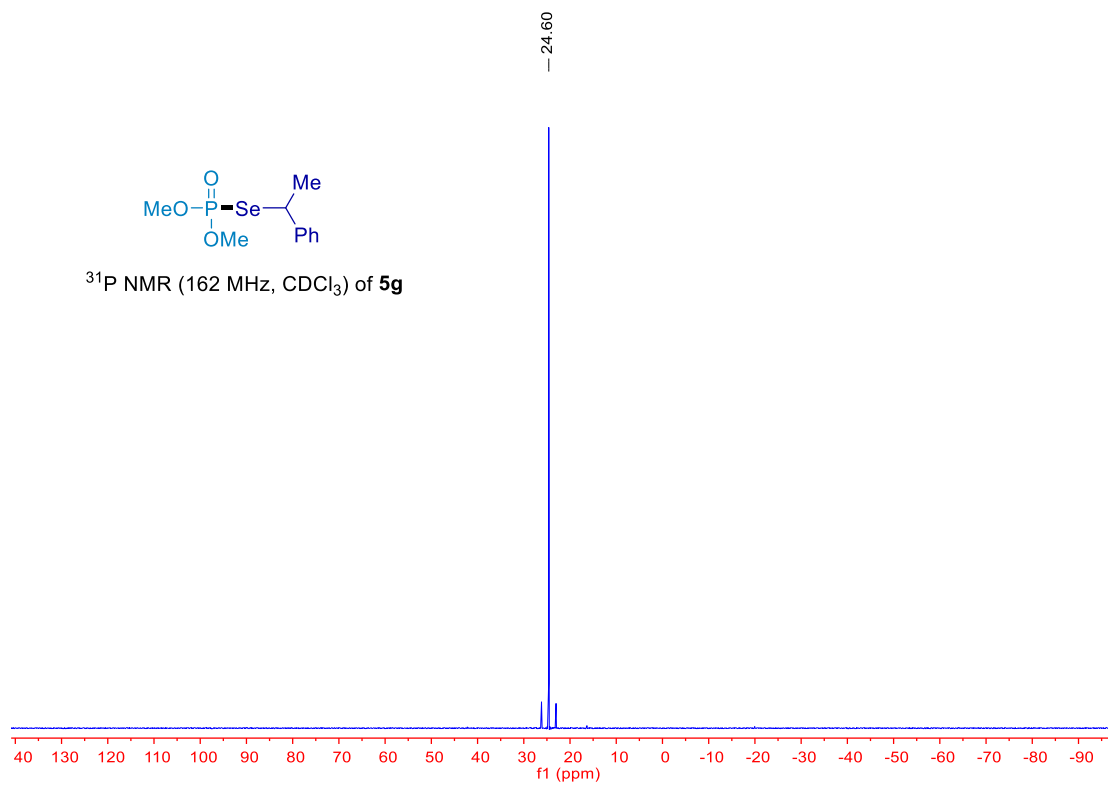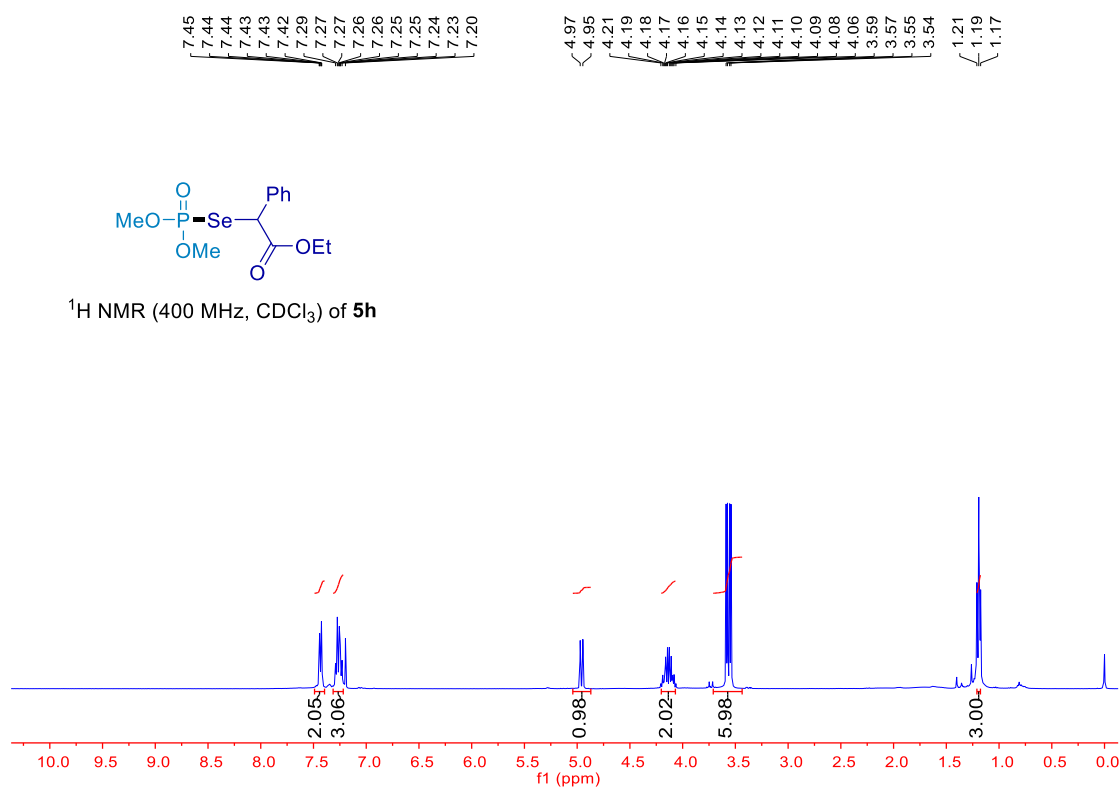



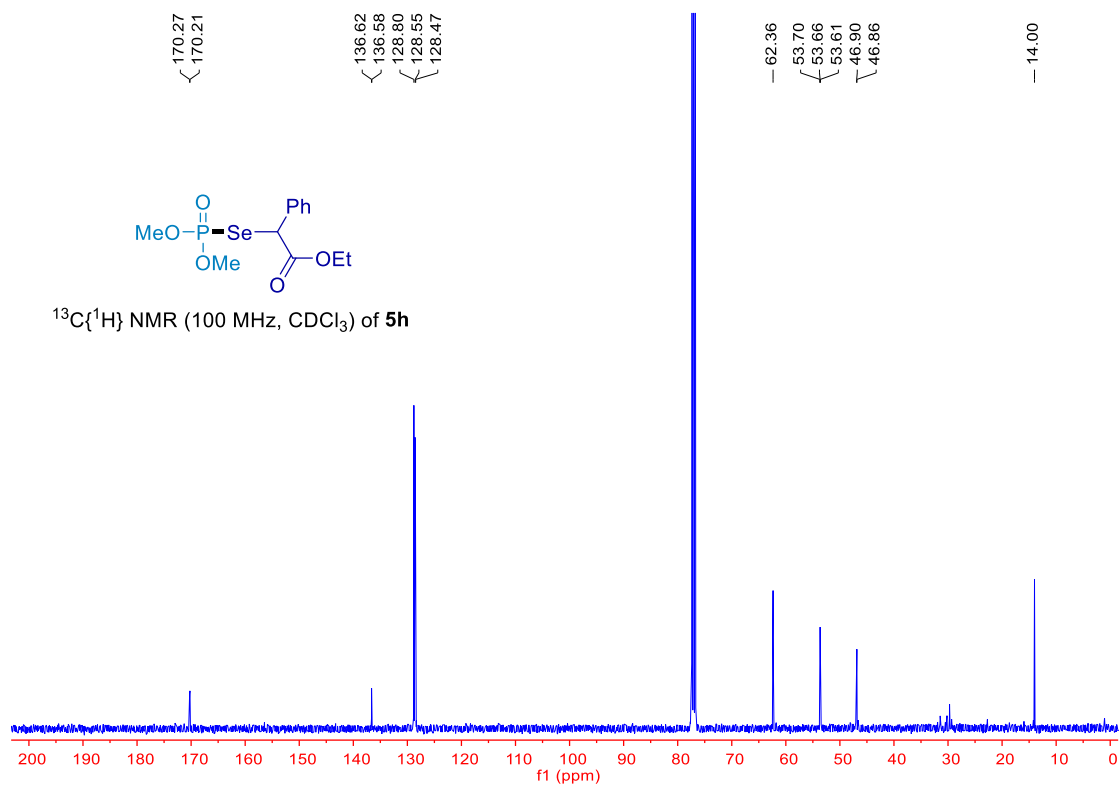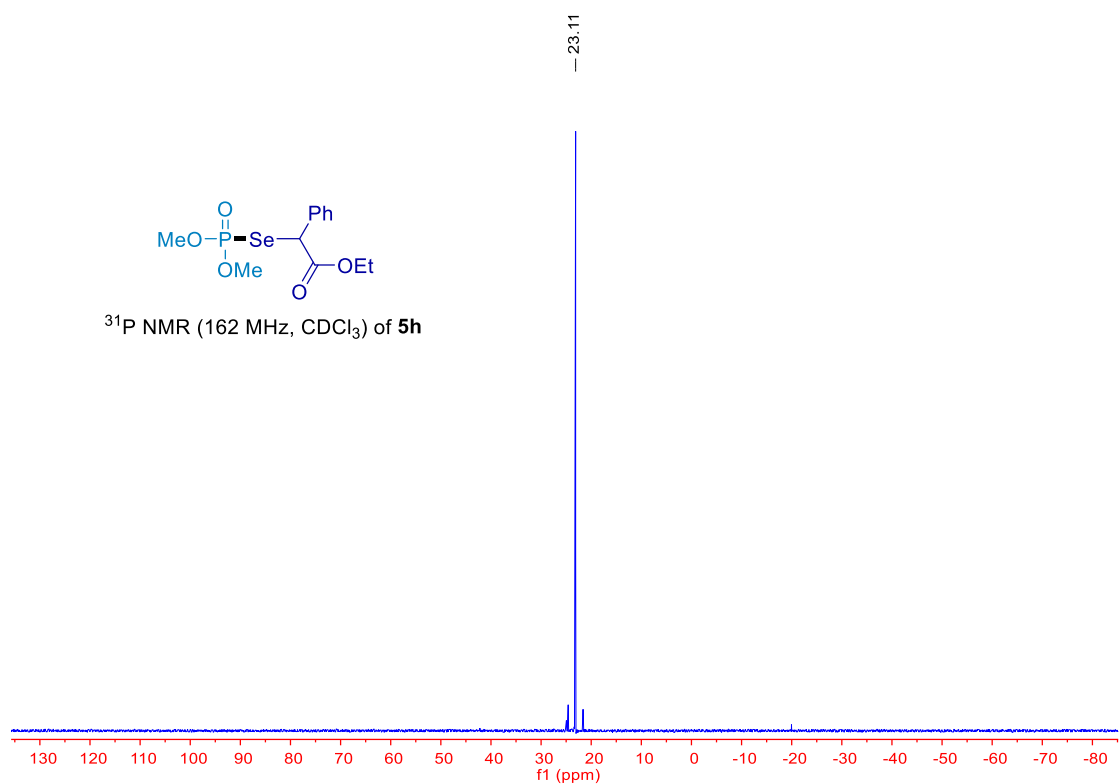

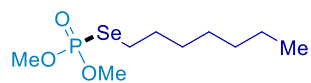

$^1\text{H}$  NMR (400 MHz,  $\text{CDCl}_3$ ) of **5i**

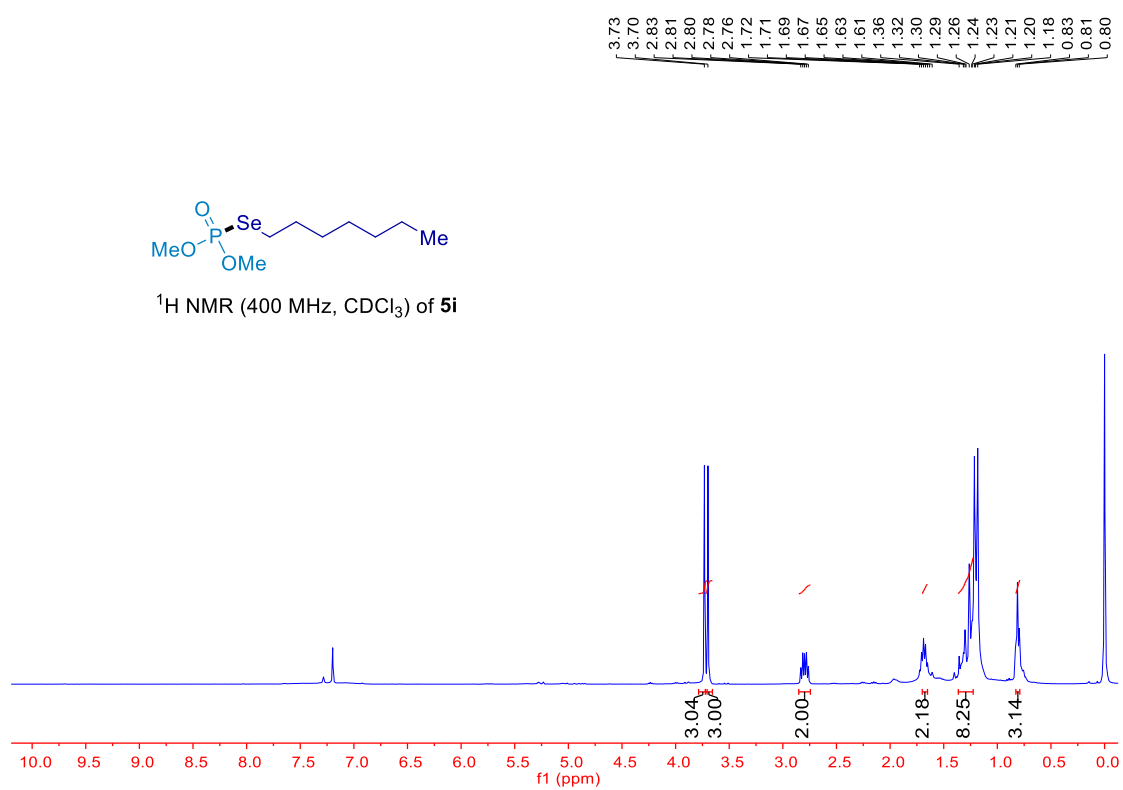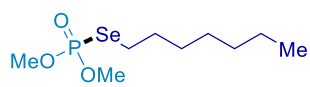

$^{13}\text{C}\{^1\text{H}\}$  NMR (100 MHz,  $\text{CDCl}_3$ ) of **5i**

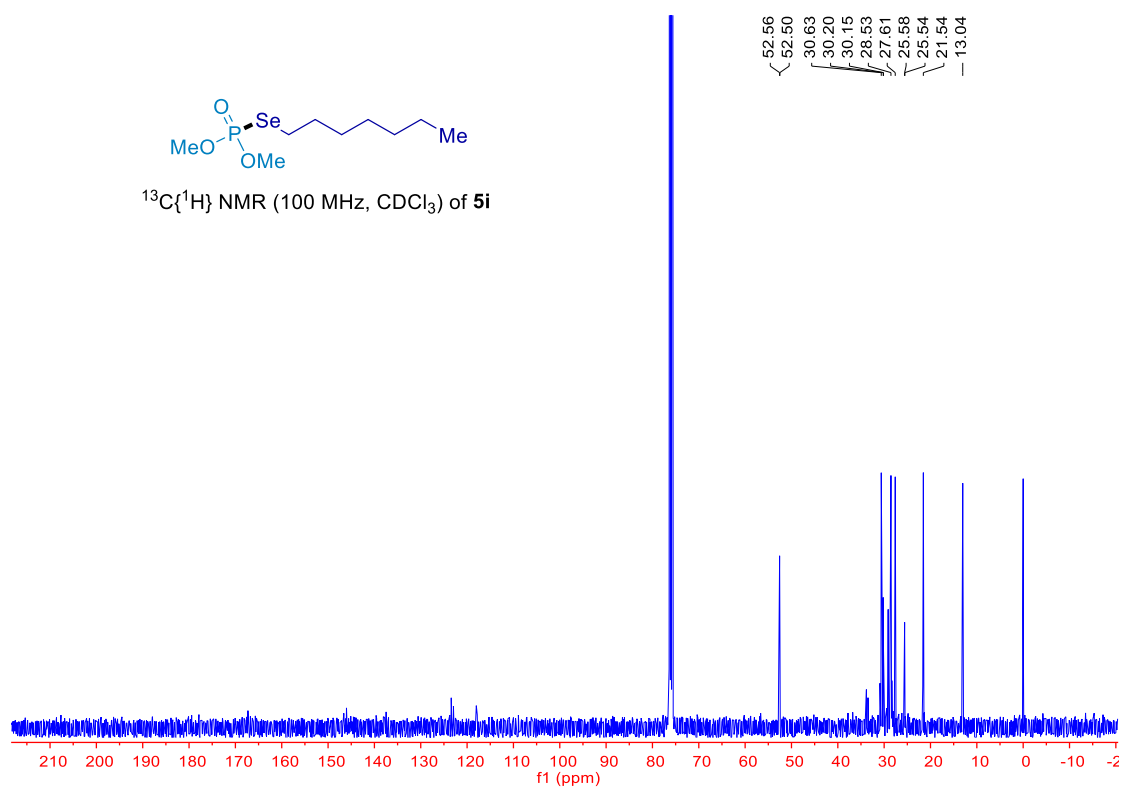

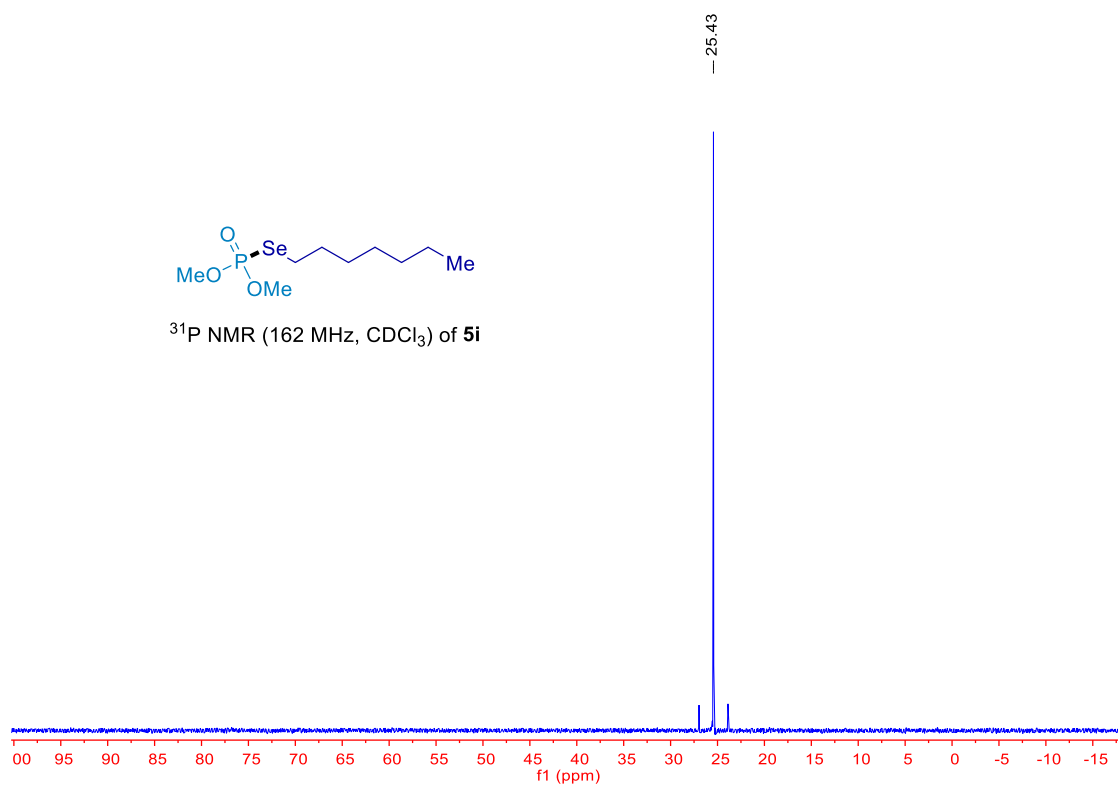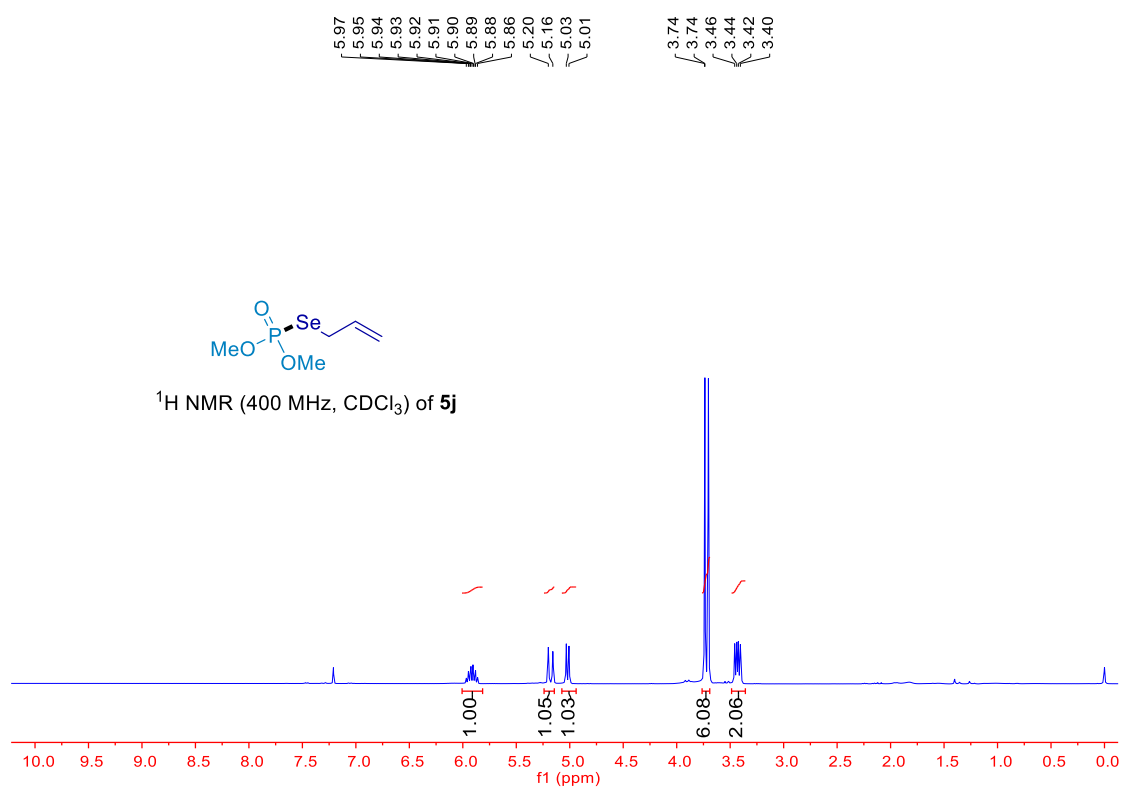

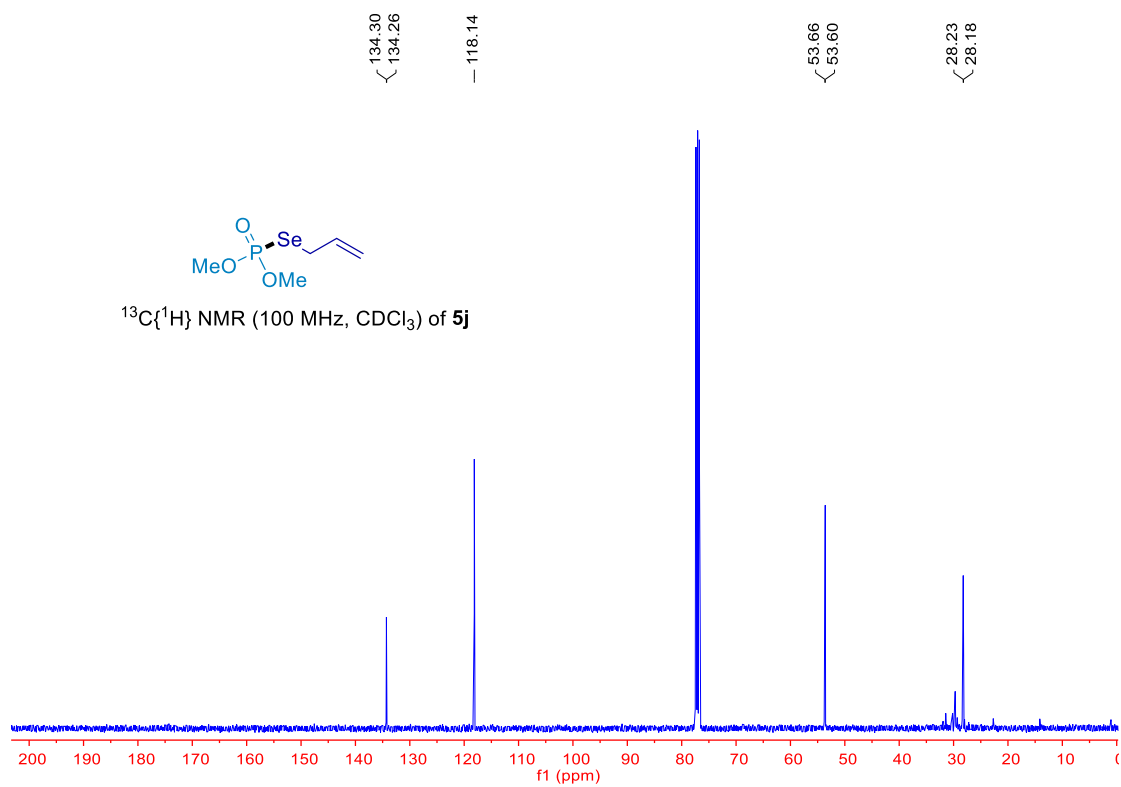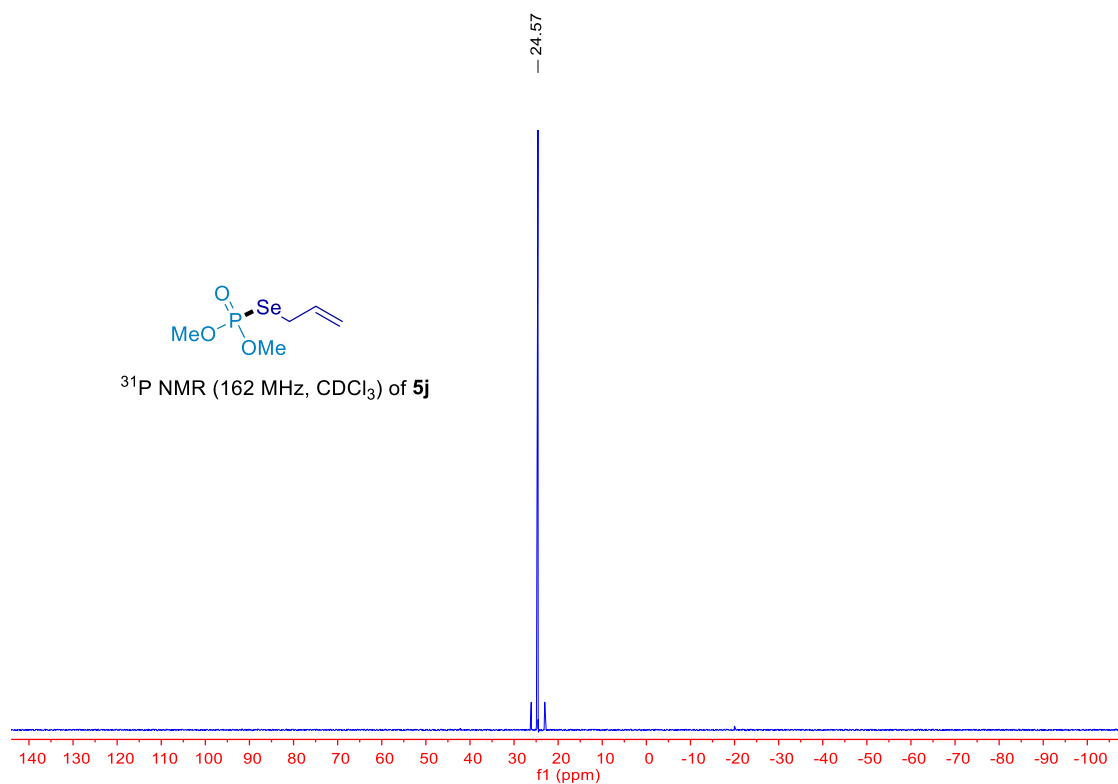

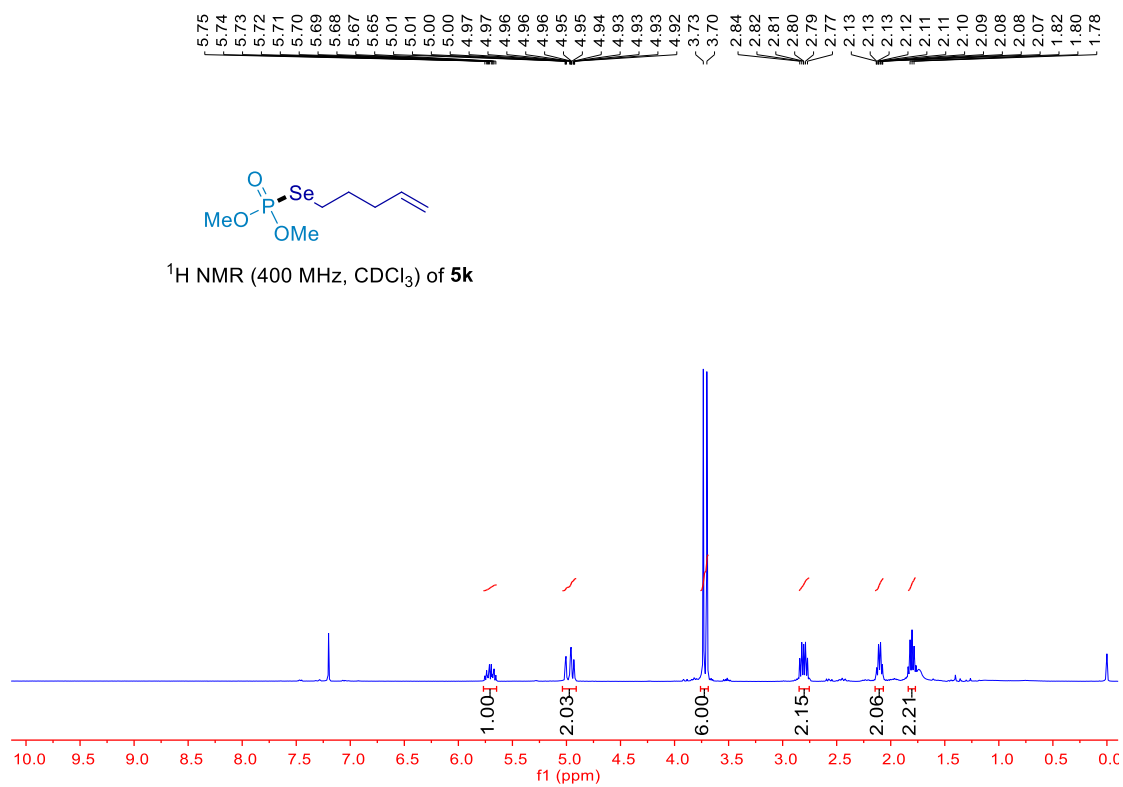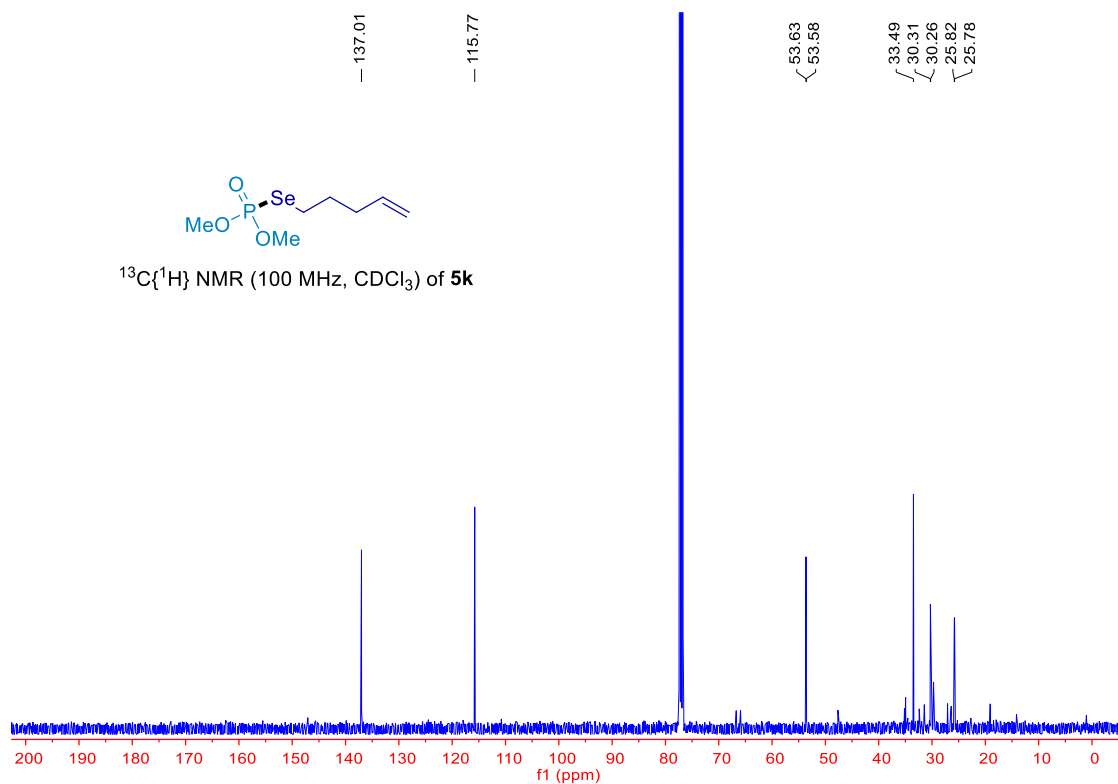

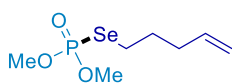

$^{31}\text{P}$  NMR (162 MHz,  $\text{CDCl}_3$ ) of **5k**

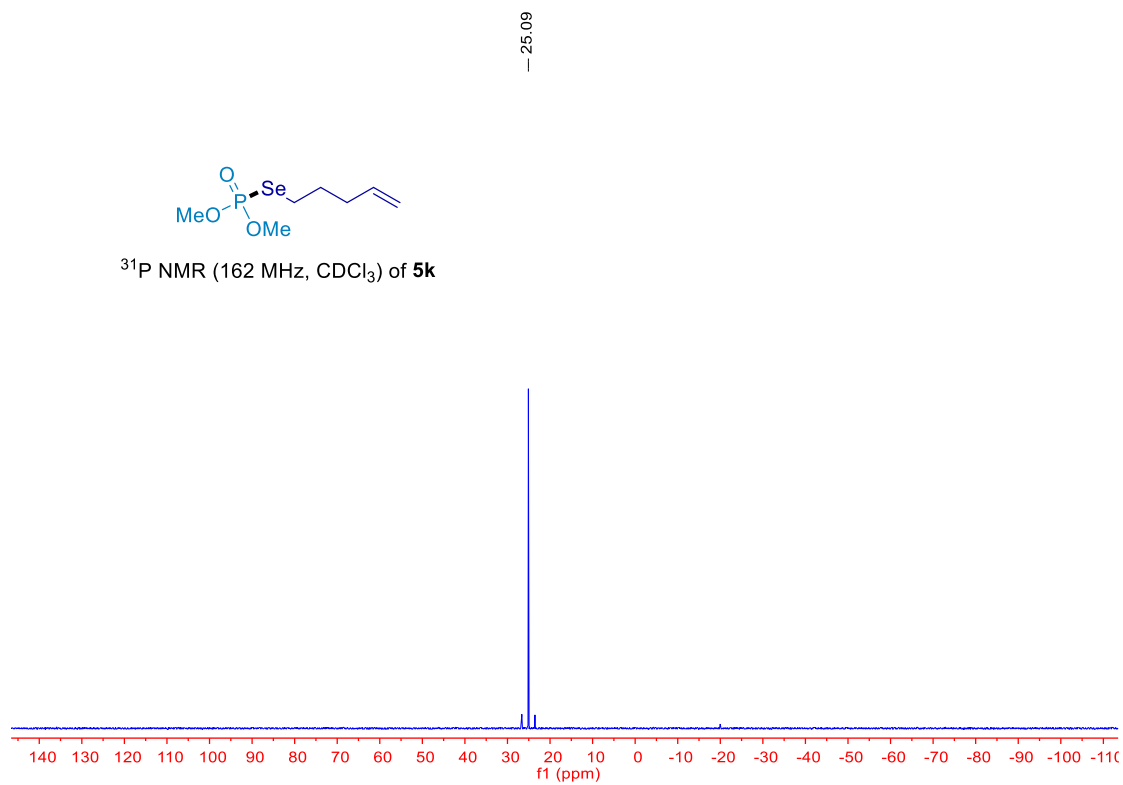

8.45  
7.54  
7.52  
7.31  
7.30  
7.29  
7.25  
7.23  
7.16  
7.15  
7.15  
7.14  
7.12  
7.10  
7.09  
7.08  
7.06  
7.01  
4.66  
3.97  
3.96  
3.95  
3.94  
3.92  
3.90  
3.89  
3.88

1.66  
0.99  
0.97  
0.95

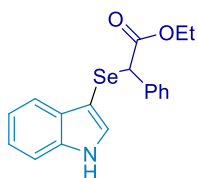

$^1\text{H}$  NMR (400 MHz,  $\text{CDCl}_3$ ) of **6a**

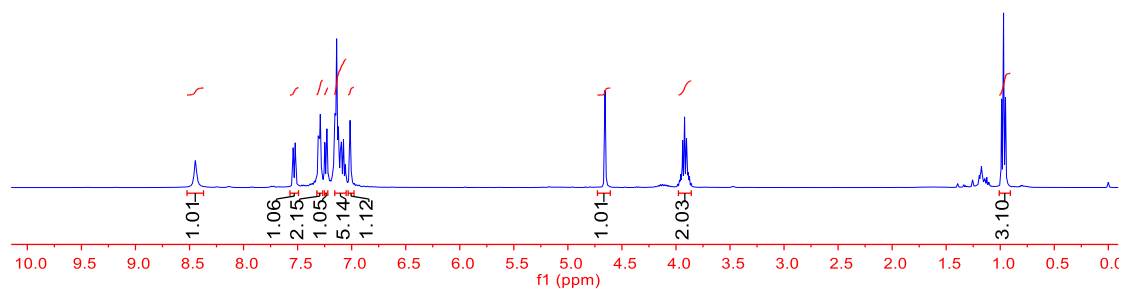

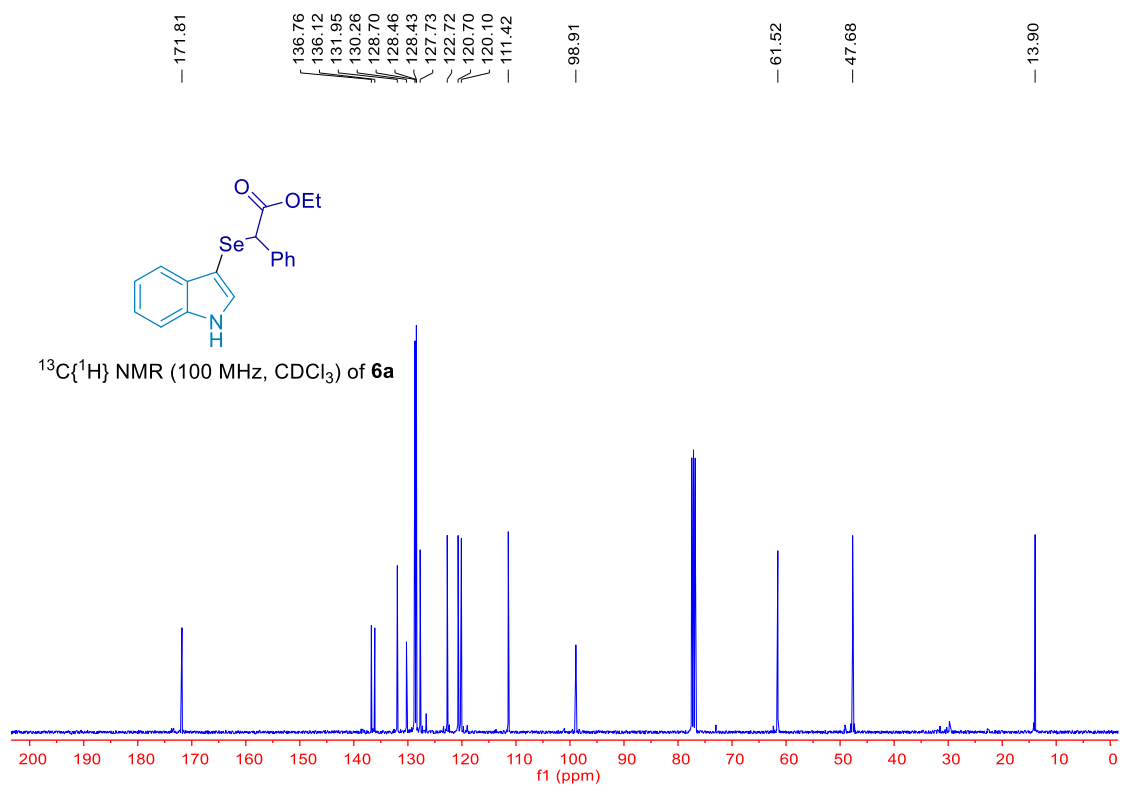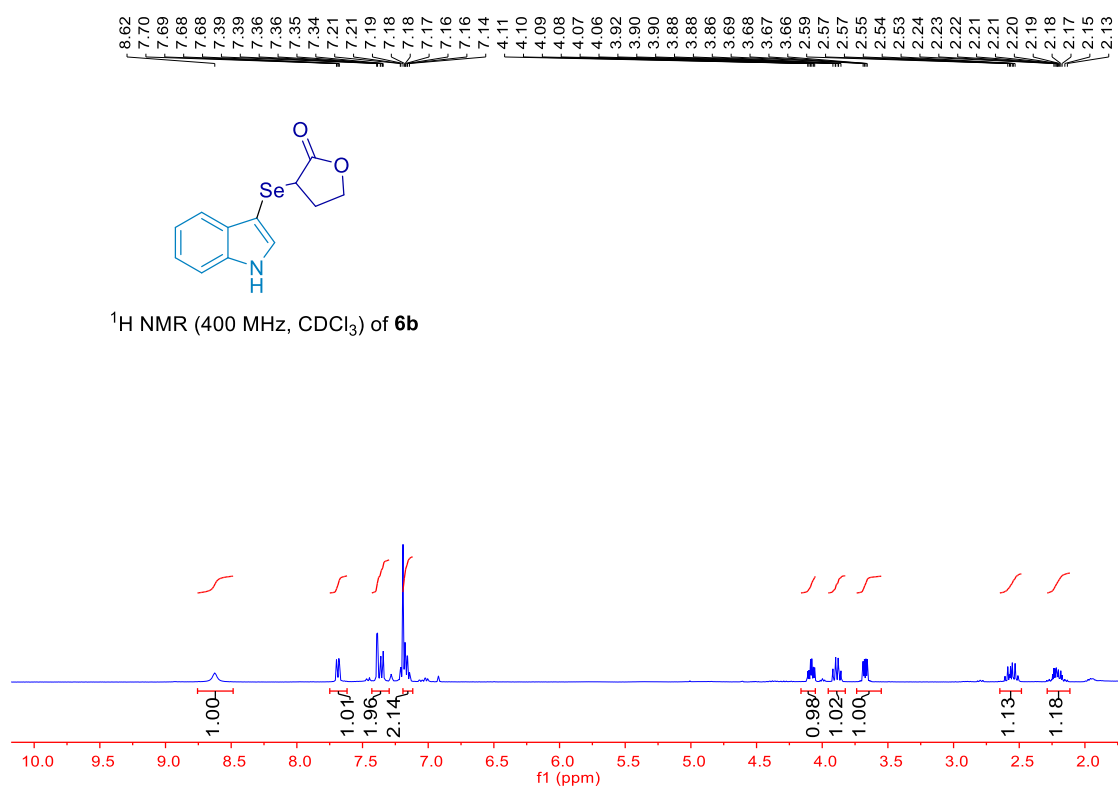

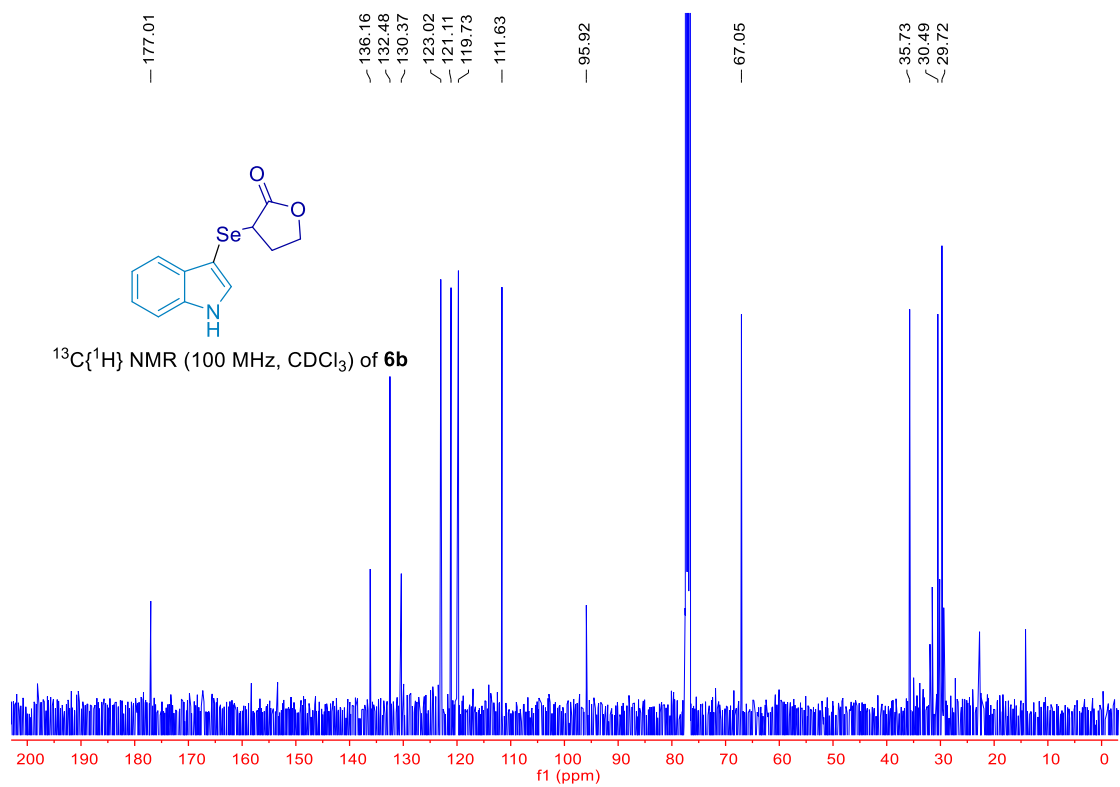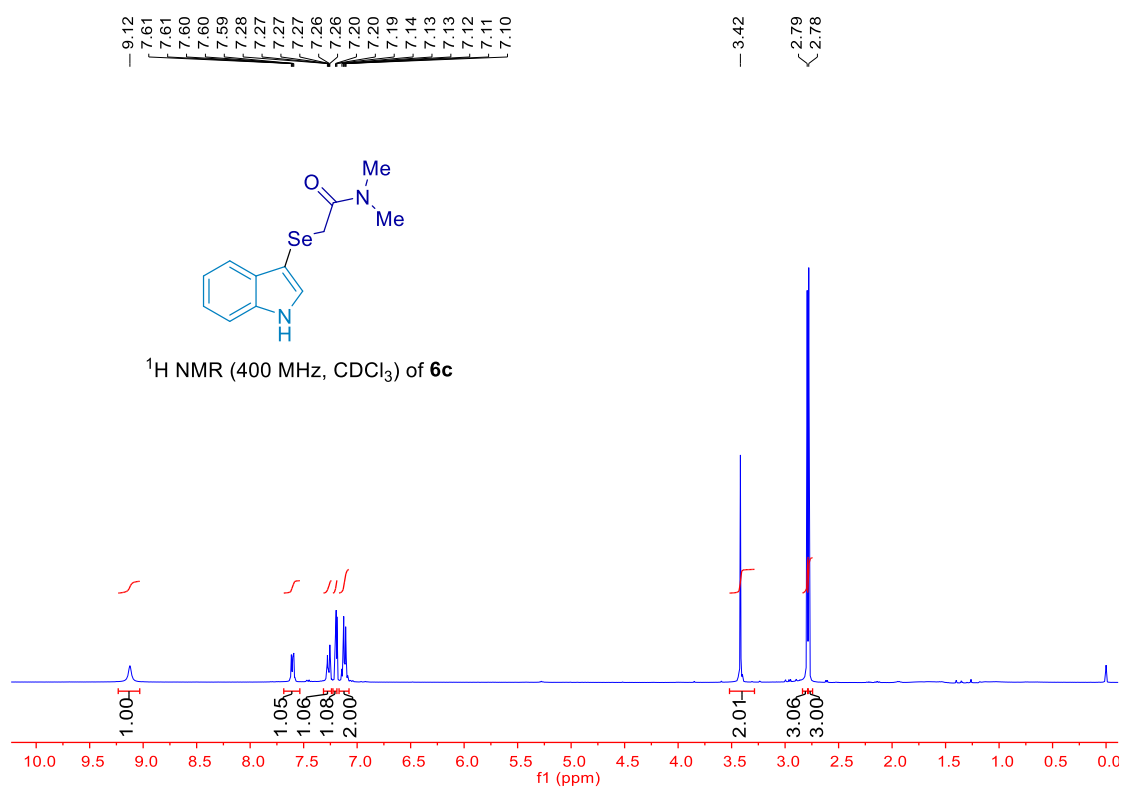



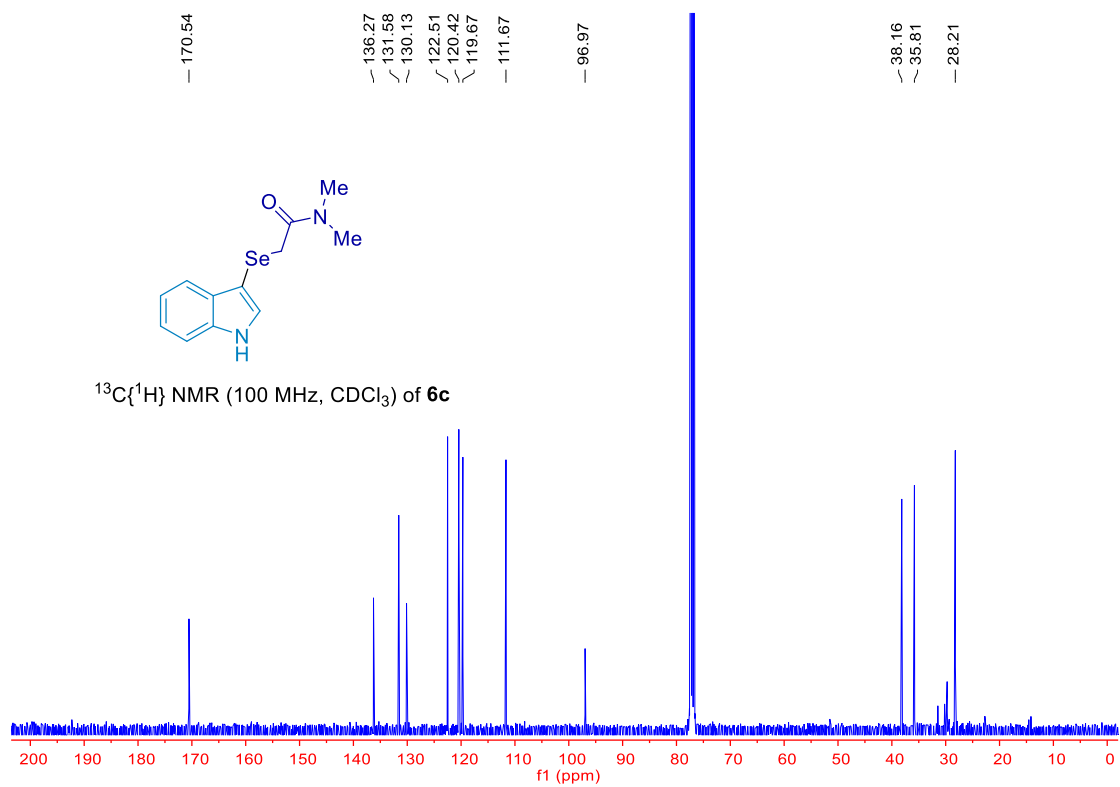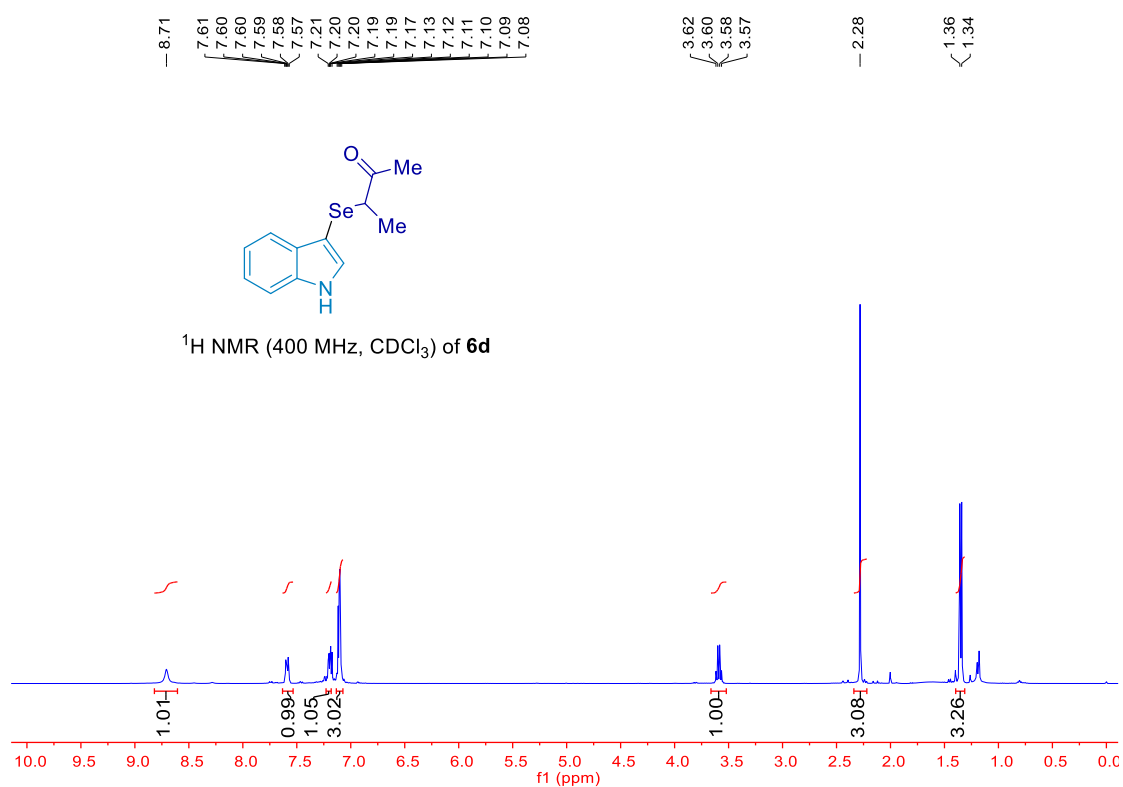

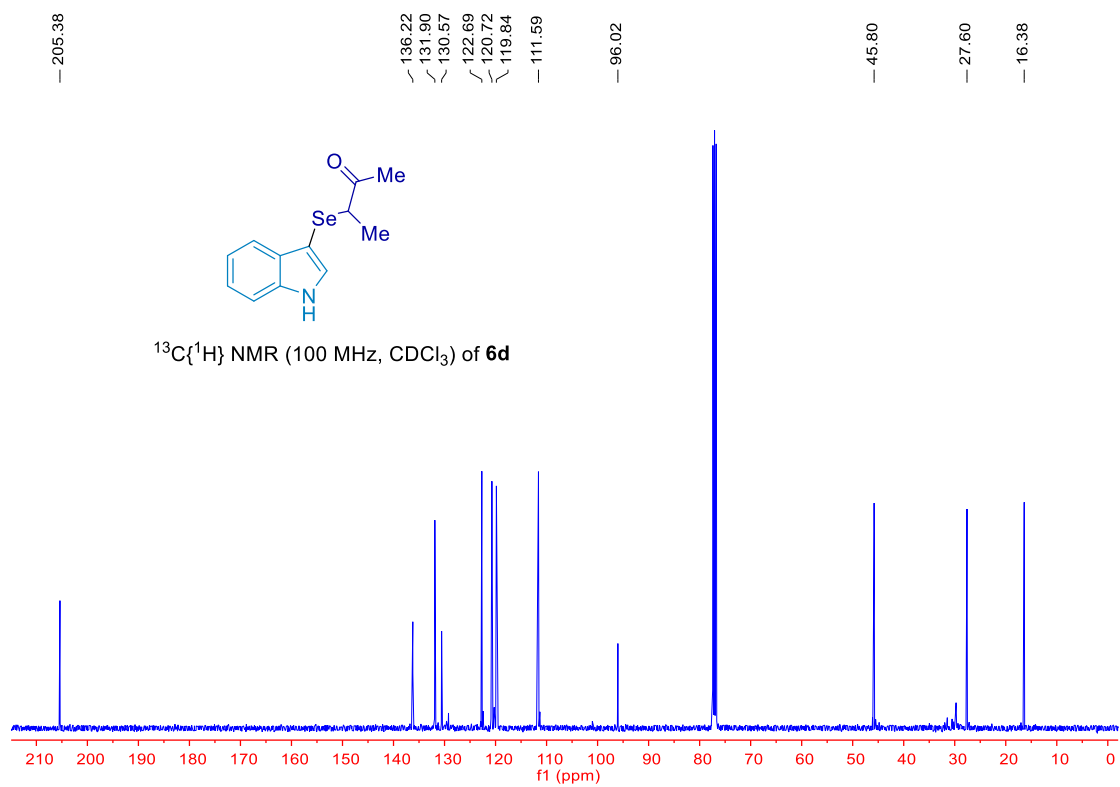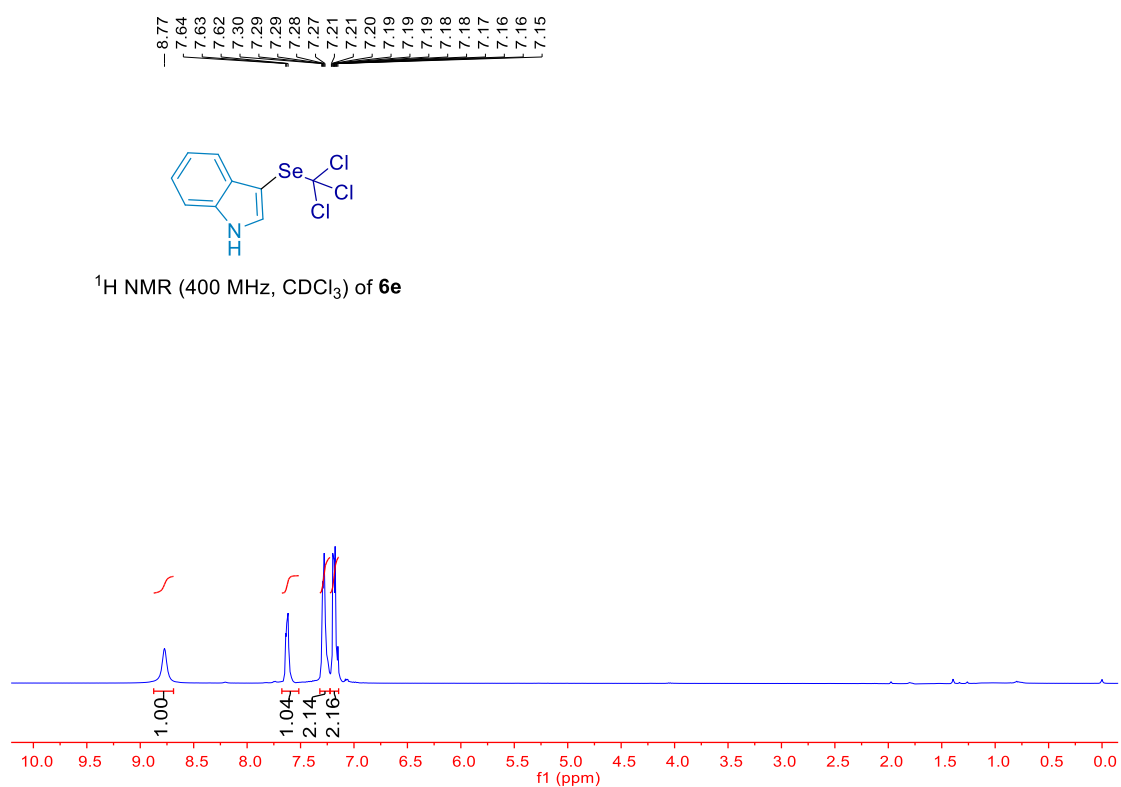

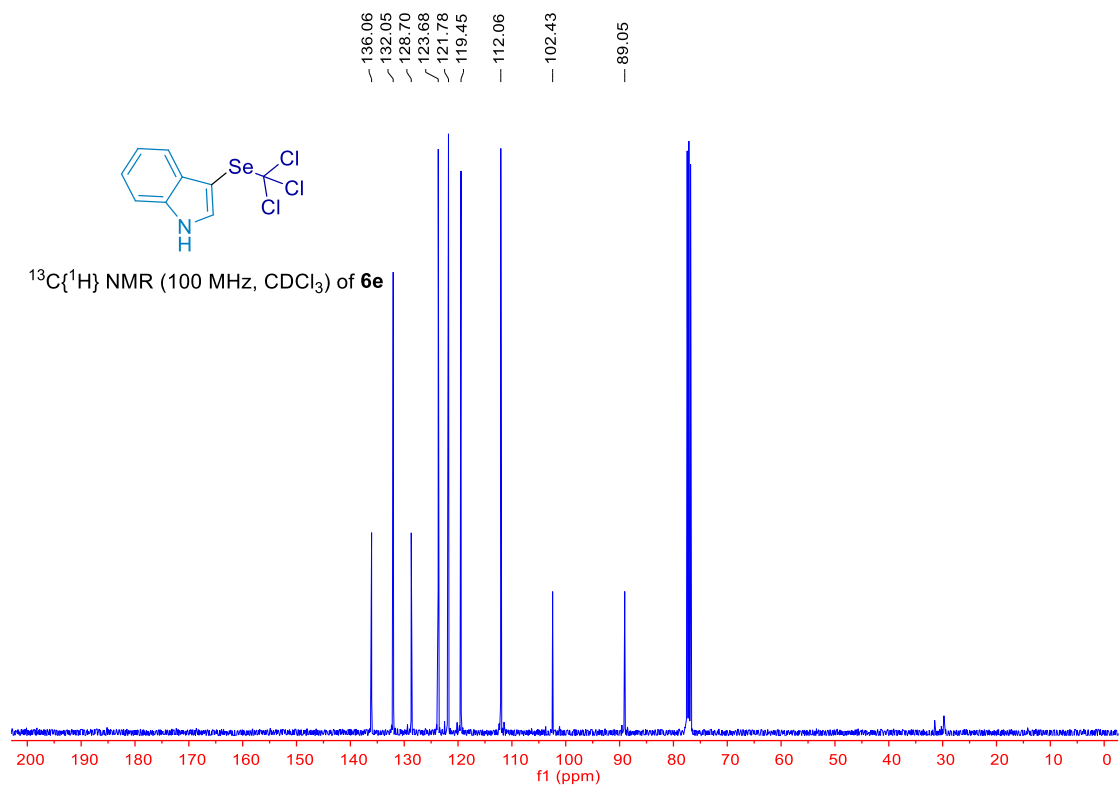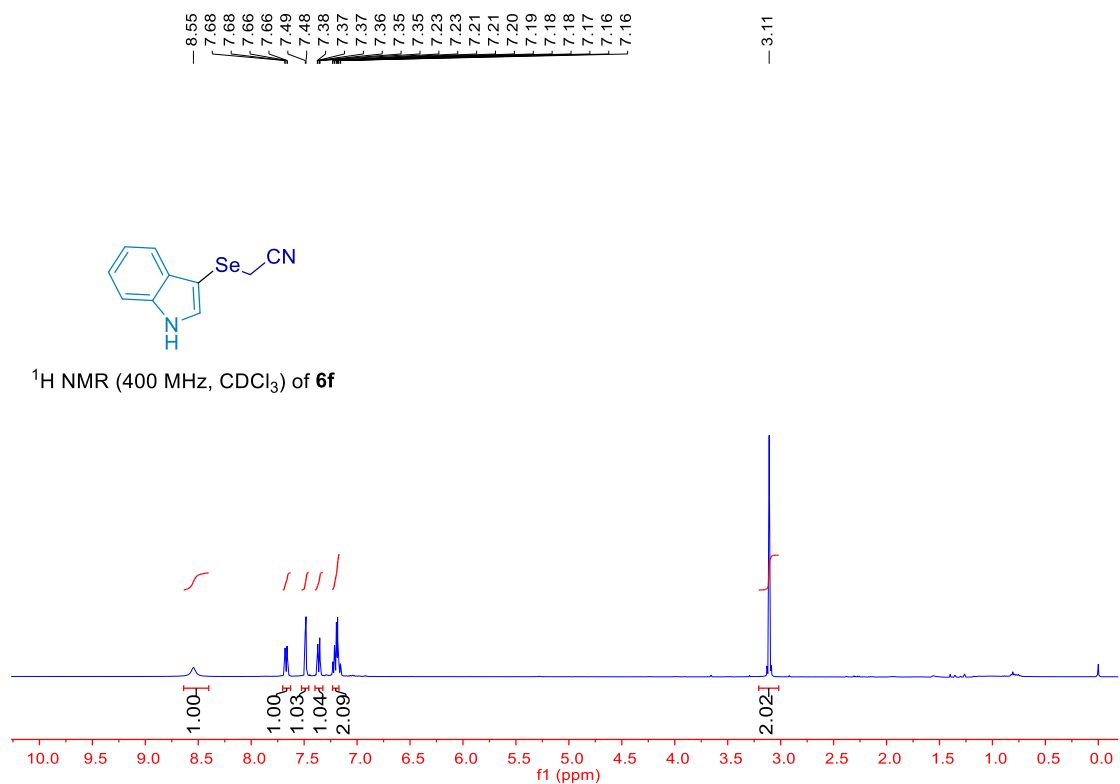

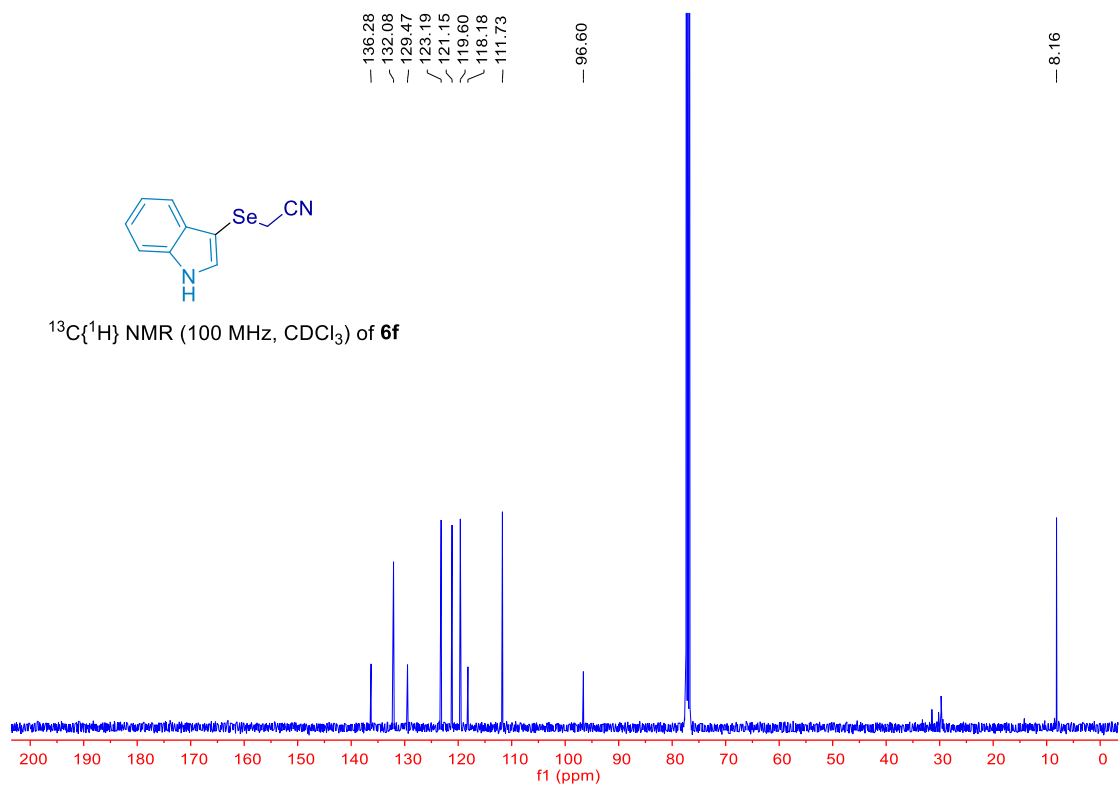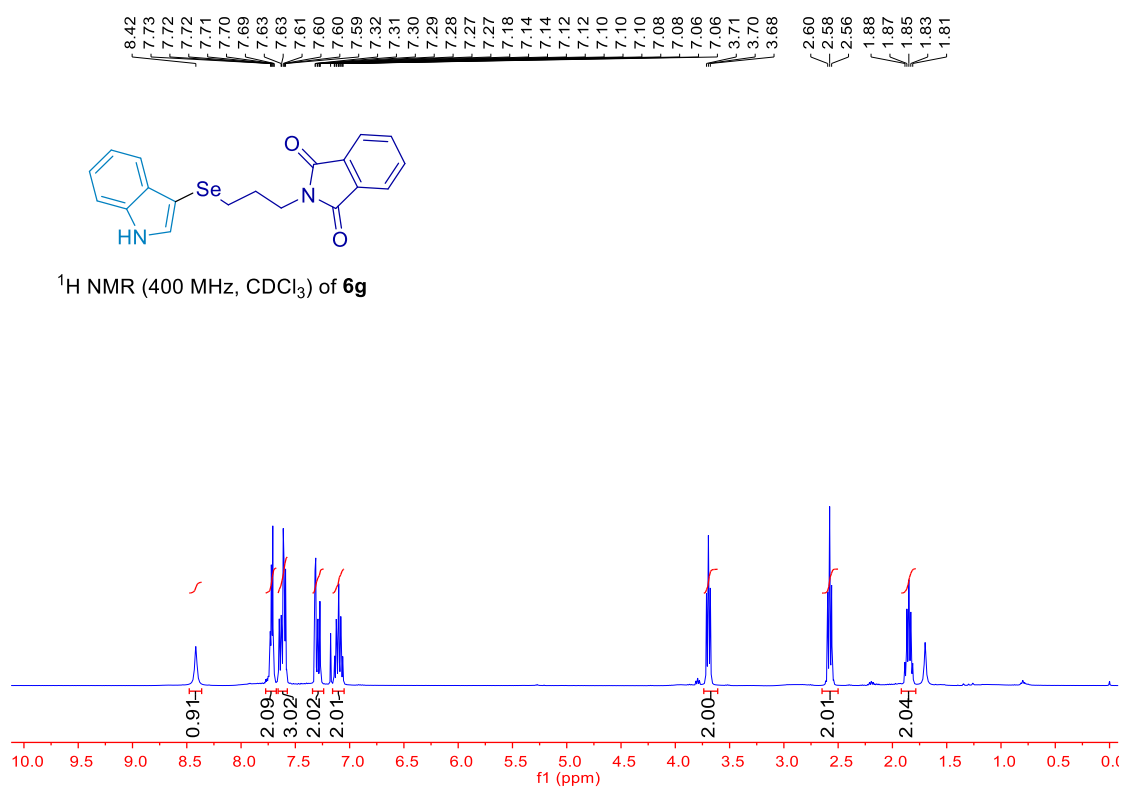

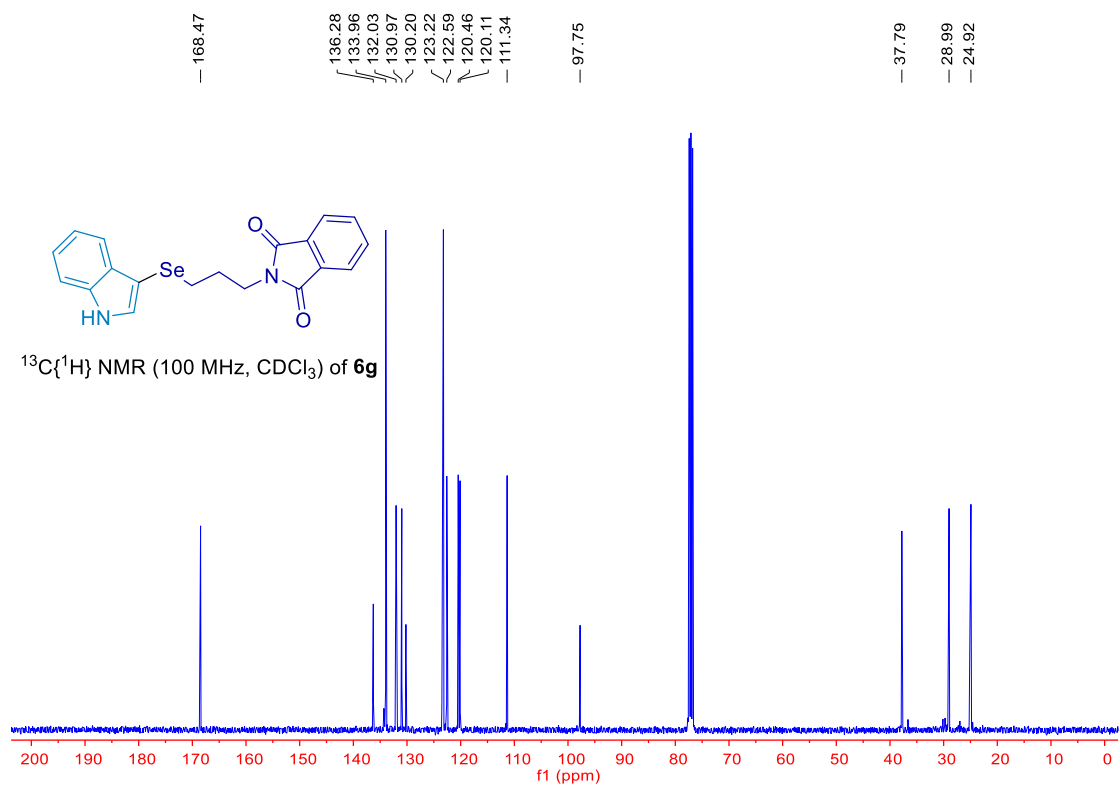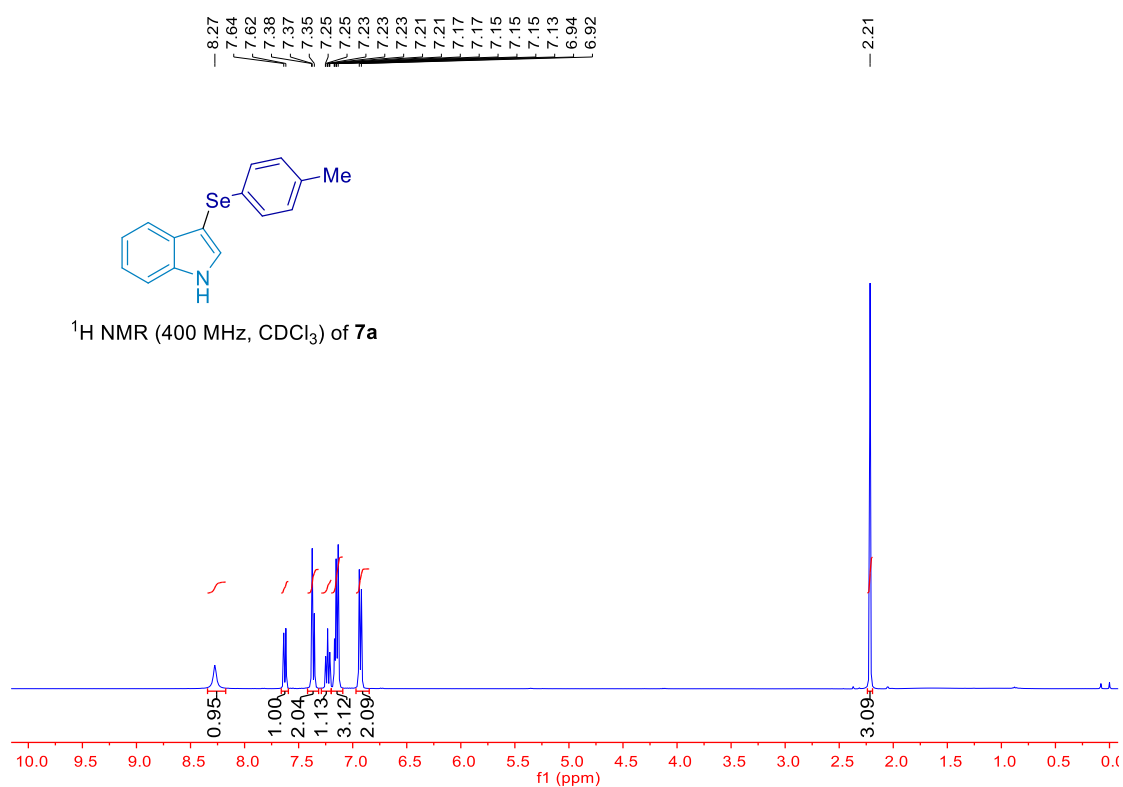

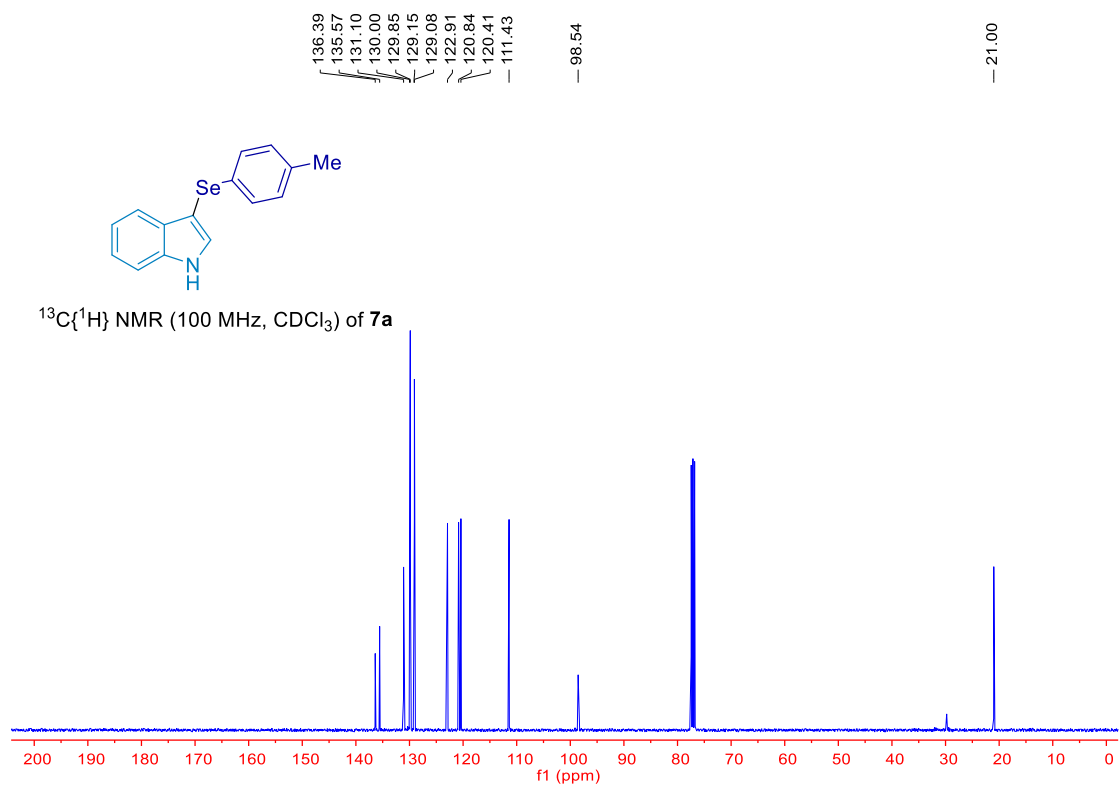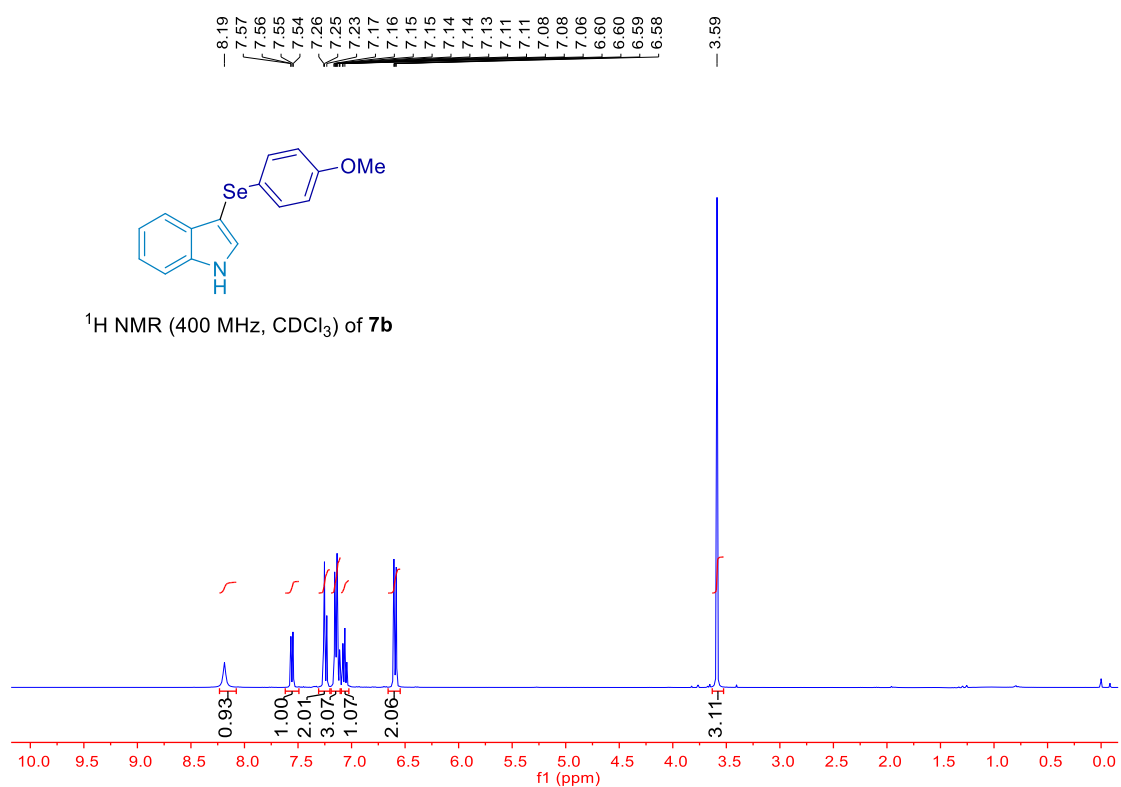

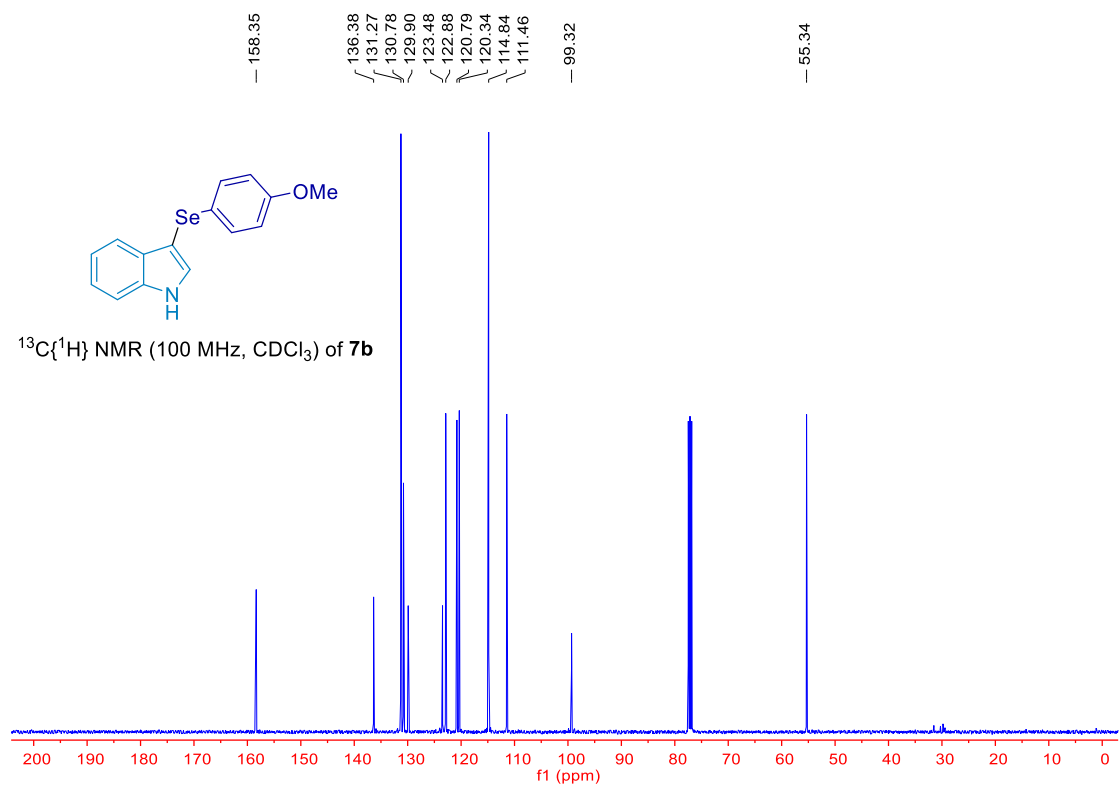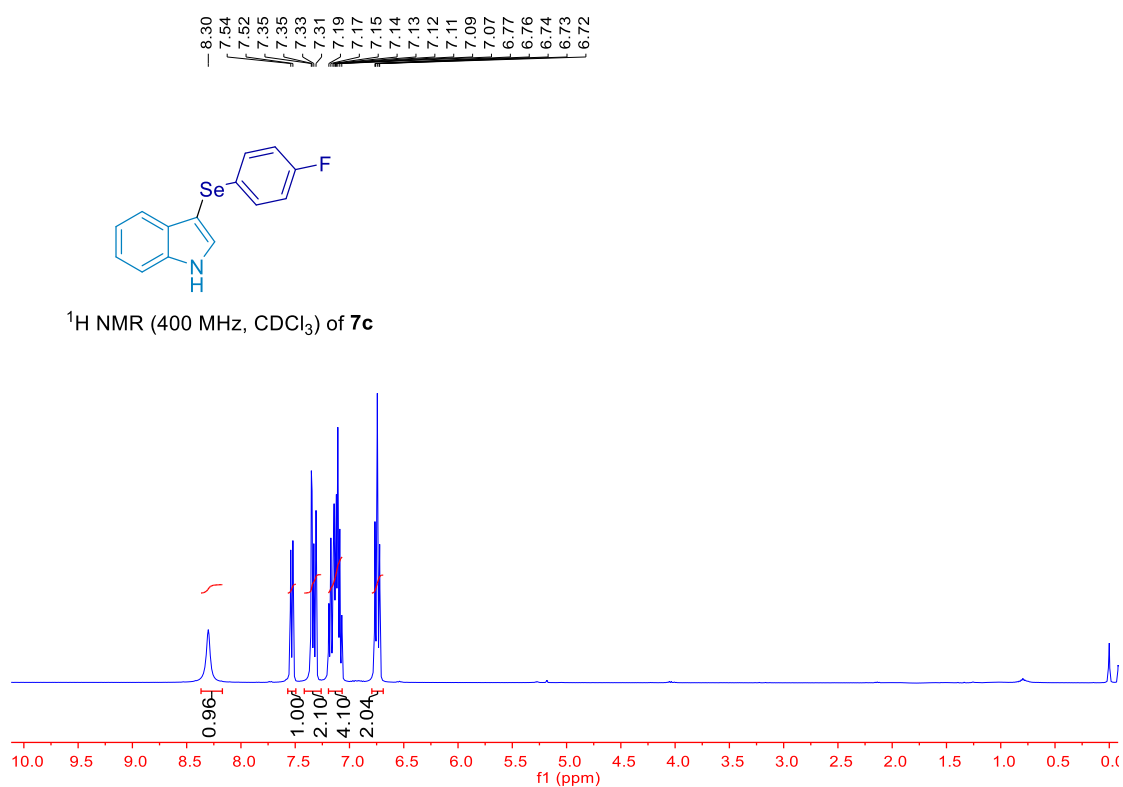

162.77  
160.34  
136.41  
131.12  
130.79  
130.71  
129.76  
127.97  
127.94  
123.06  
120.97  
120.24  
116.20  
115.98  
111.50  
98.57

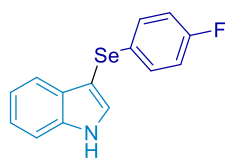

$^{13}\text{C}\{^1\text{H}\}$  NMR (100 MHz,  $\text{CDCl}_3$ ) of **7c**

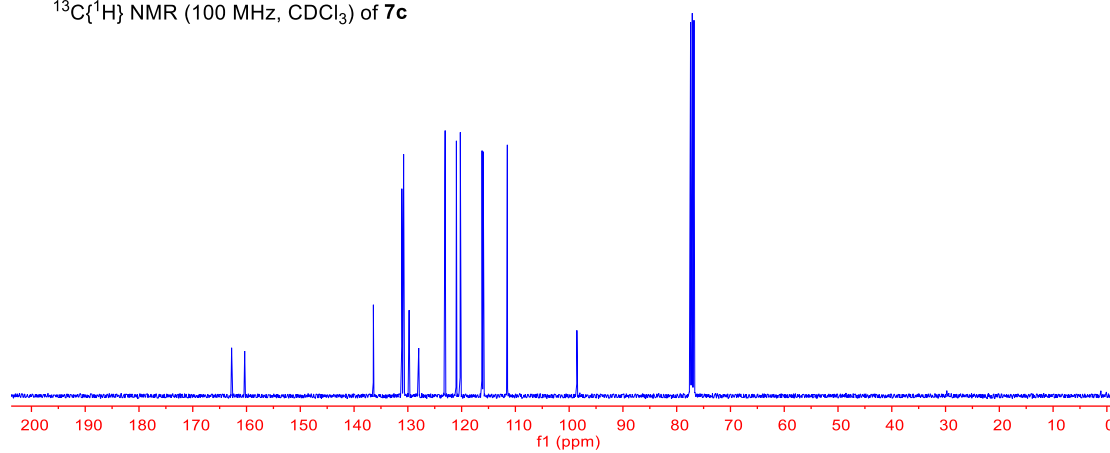

-117.19

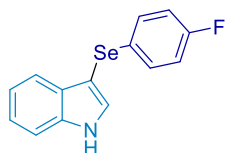

$^{19}\text{F}$  NMR (376 MHz,  $\text{CDCl}_3$ ) of **7c**

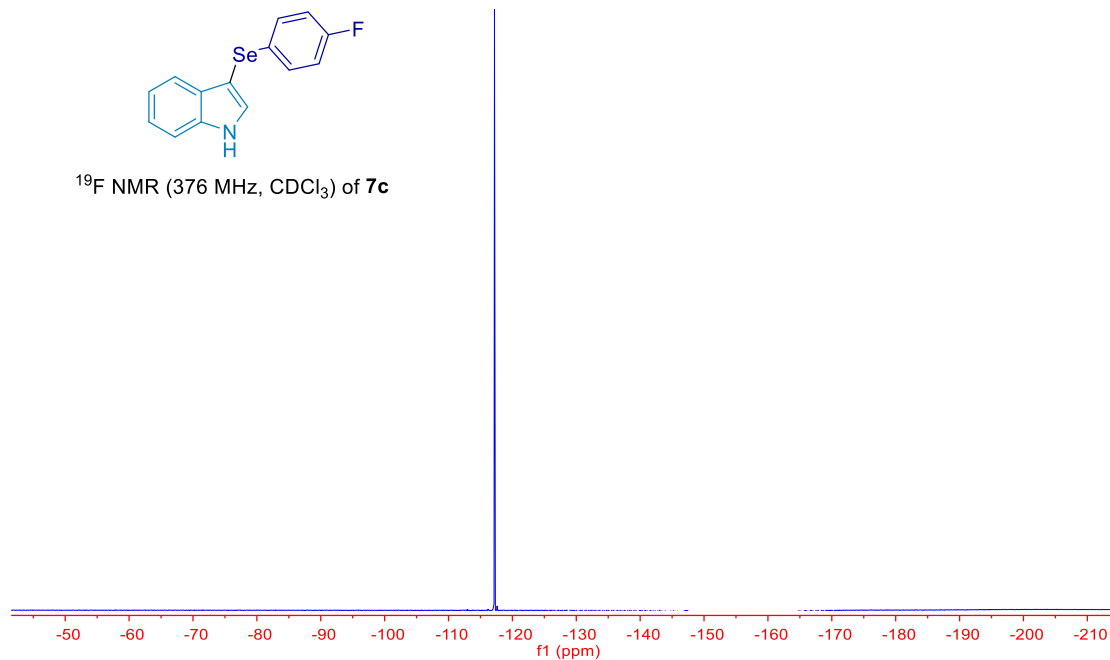



8.34  
7.52  
7.52  
7.50  
7.49  
7.36  
7.36  
7.35  
7.33  
7.33  
7.20  
7.20  
7.19  
7.18  
7.16  
7.15  
7.11  
7.11  
7.09  
7.09  
7.08  
7.07  
7.06  
7.06  
7.04  
7.04  
7.03  
7.00  
6.99  
6.98

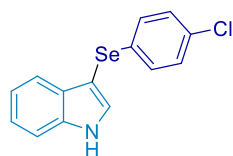

$^1\text{H}$  NMR (400 MHz,  $\text{CDCl}_3$ ) of **7d**

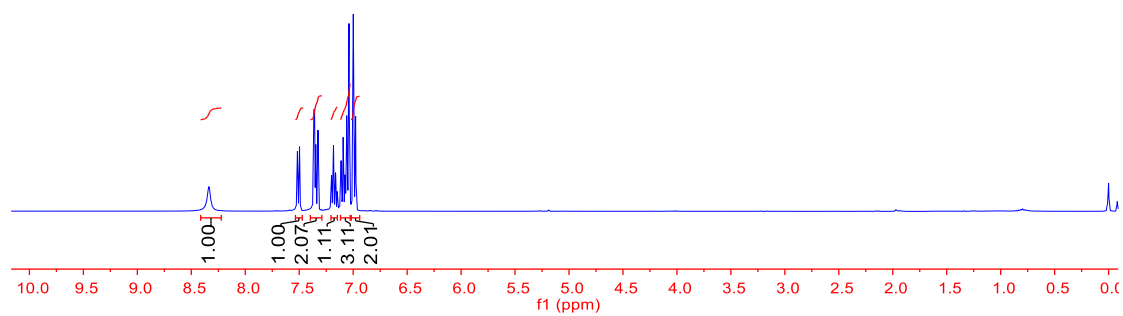

136.43  
132.09  
131.59  
131.33  
129.96  
129.71  
129.05  
123.13  
121.05  
120.22  
111.53  
— 97.84

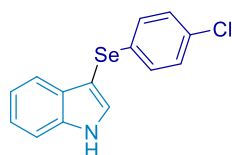

$^{13}\text{C}\{^1\text{H}\}$  NMR (100 MHz,  $\text{CDCl}_3$ ) of **7d**

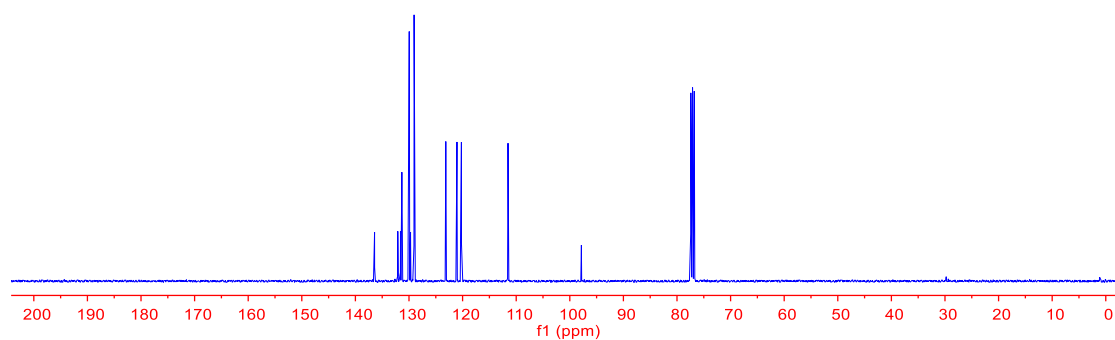

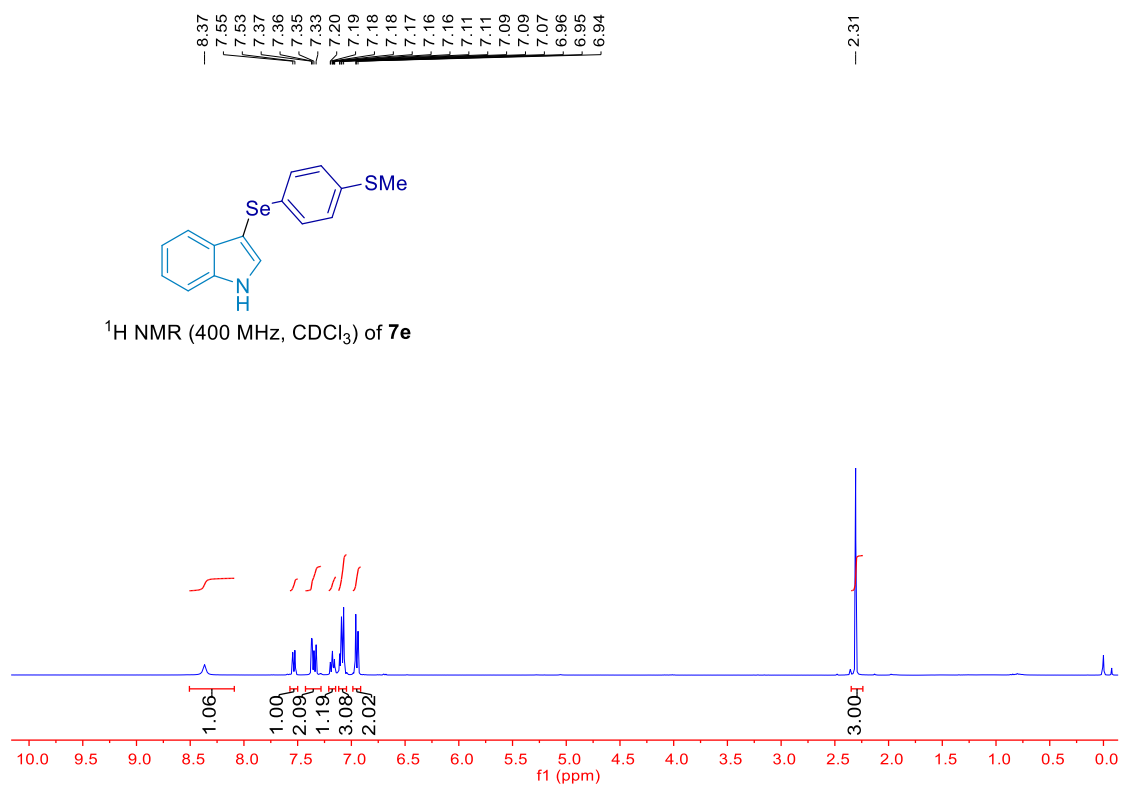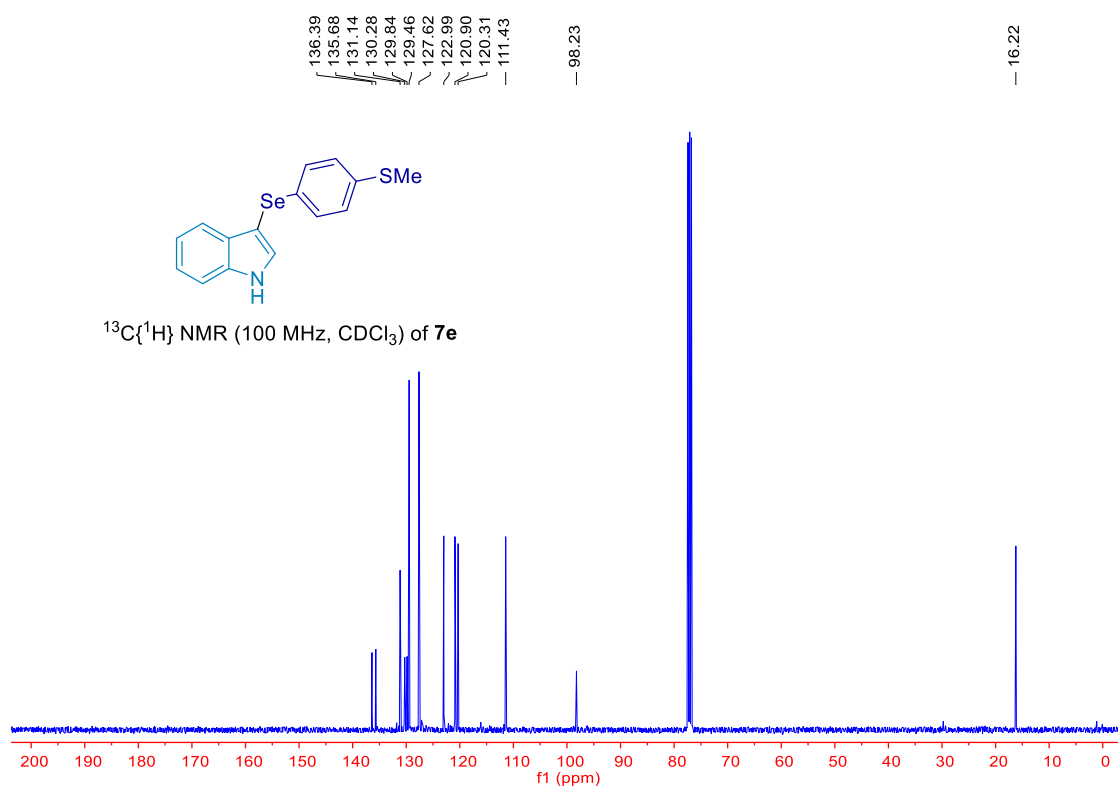

8.57  
7.57  
7.55  
7.49  
7.49  
7.48  
7.48  
7.46  
7.32  
7.31  
7.31  
7.30  
7.30  
7.30  
7.28  
7.27  
7.21  
7.21  
7.19  
7.17  
6.85  
6.84  
6.83  
6.82  
6.82  
6.61  
6.59

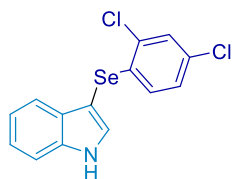

$^1\text{H}$  NMR (400 MHz,  $\text{CDCl}_3$ ) of **7f**

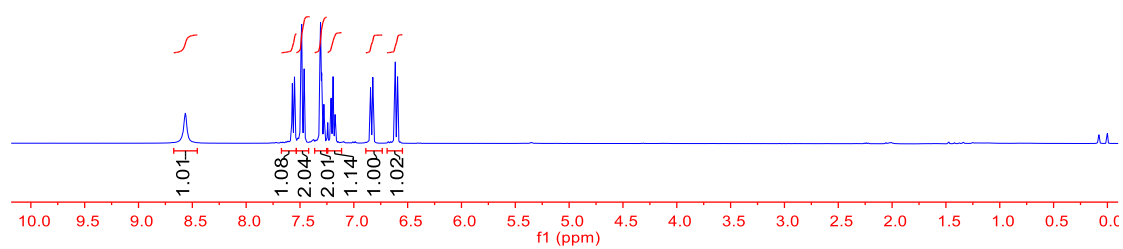

136.58  
133.09  
132.43  
132.09  
131.45  
129.65  
129.60  
128.85  
127.41  
123.34  
121.27  
120.16  
111.64  
96.50

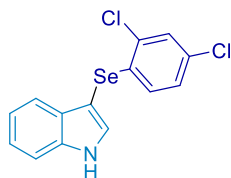

$^{13}\text{C}\{^1\text{H}\}$  NMR (100 MHz,  $\text{CDCl}_3$ ) of **7f**

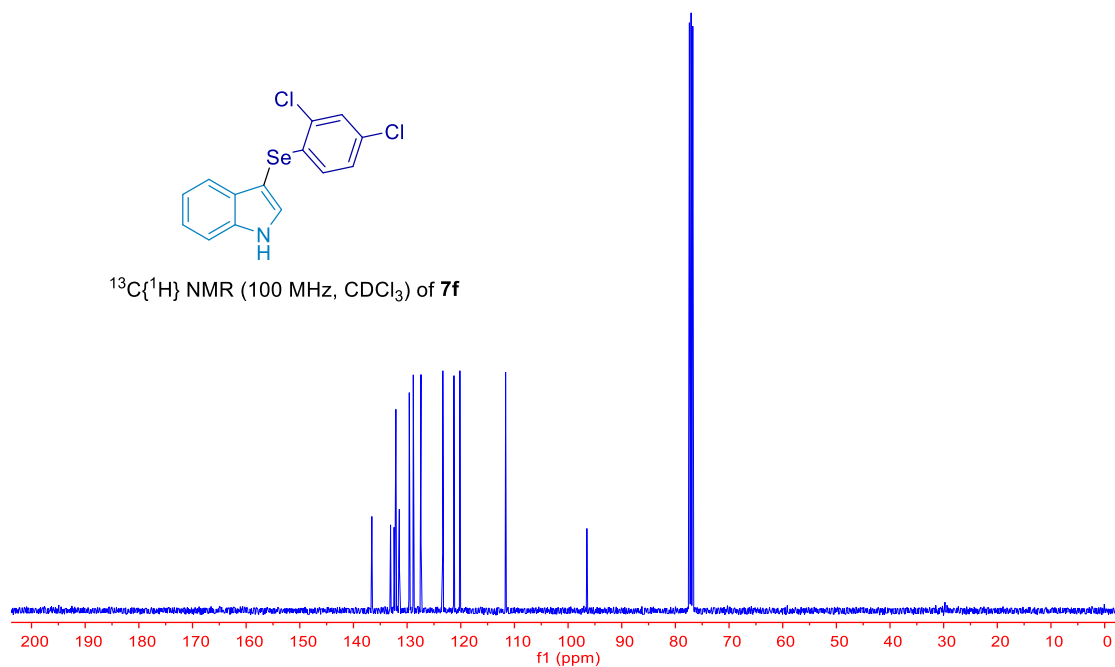

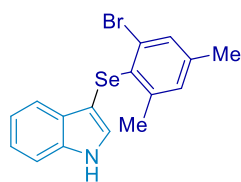

$^1\text{H}$  NMR (400 MHz,  $\text{CDCl}_3$ ) of **7g**

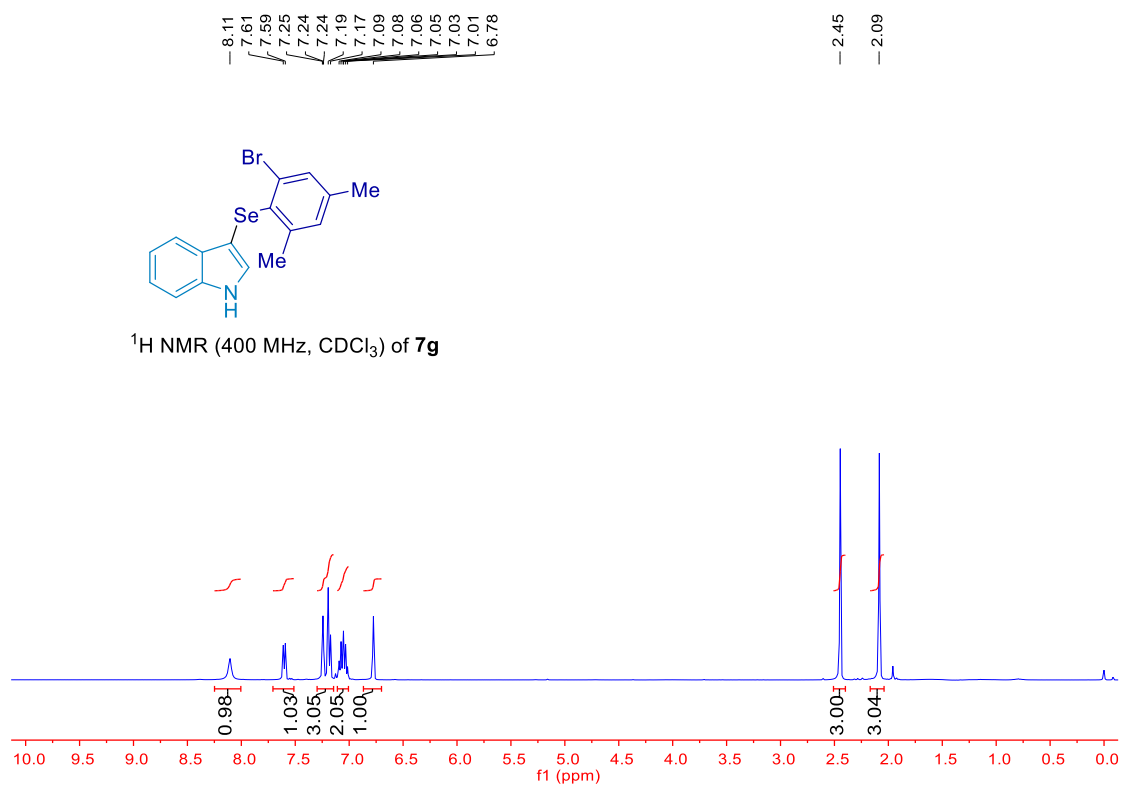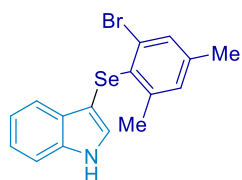

$^{13}\text{C}\{^1\text{H}\}$  NMR (100 MHz,  $\text{CDCl}_3$ ) of **7g**

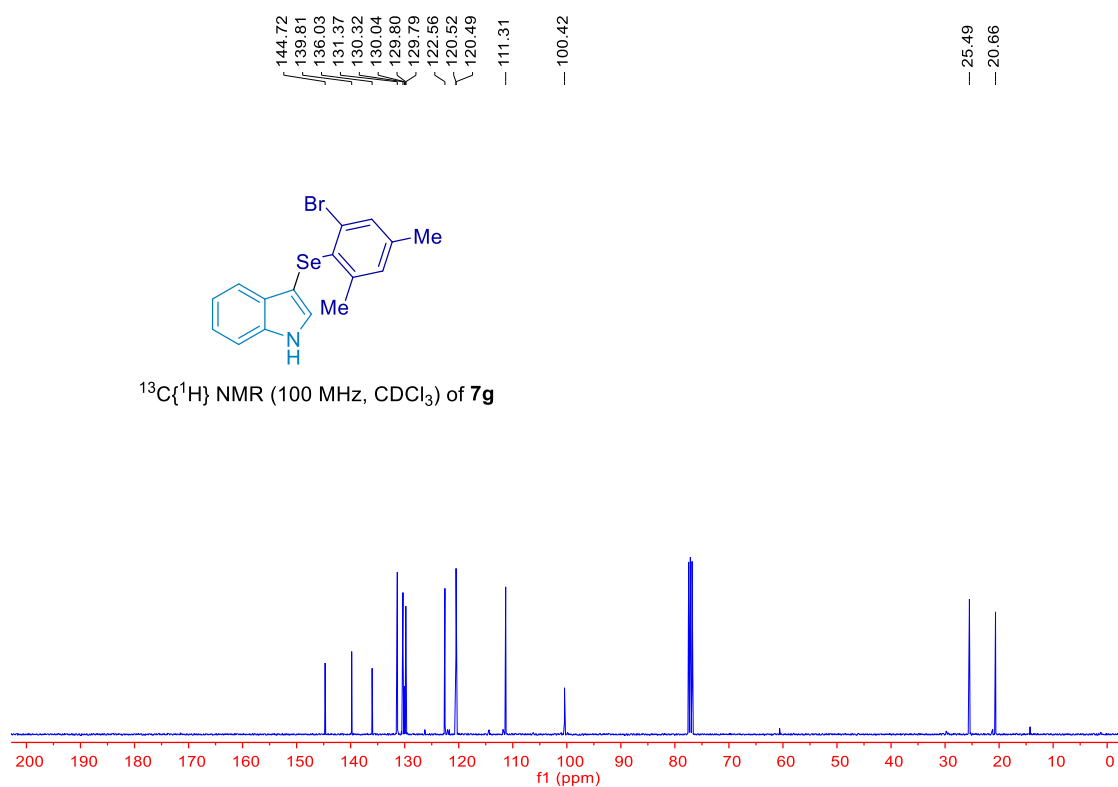

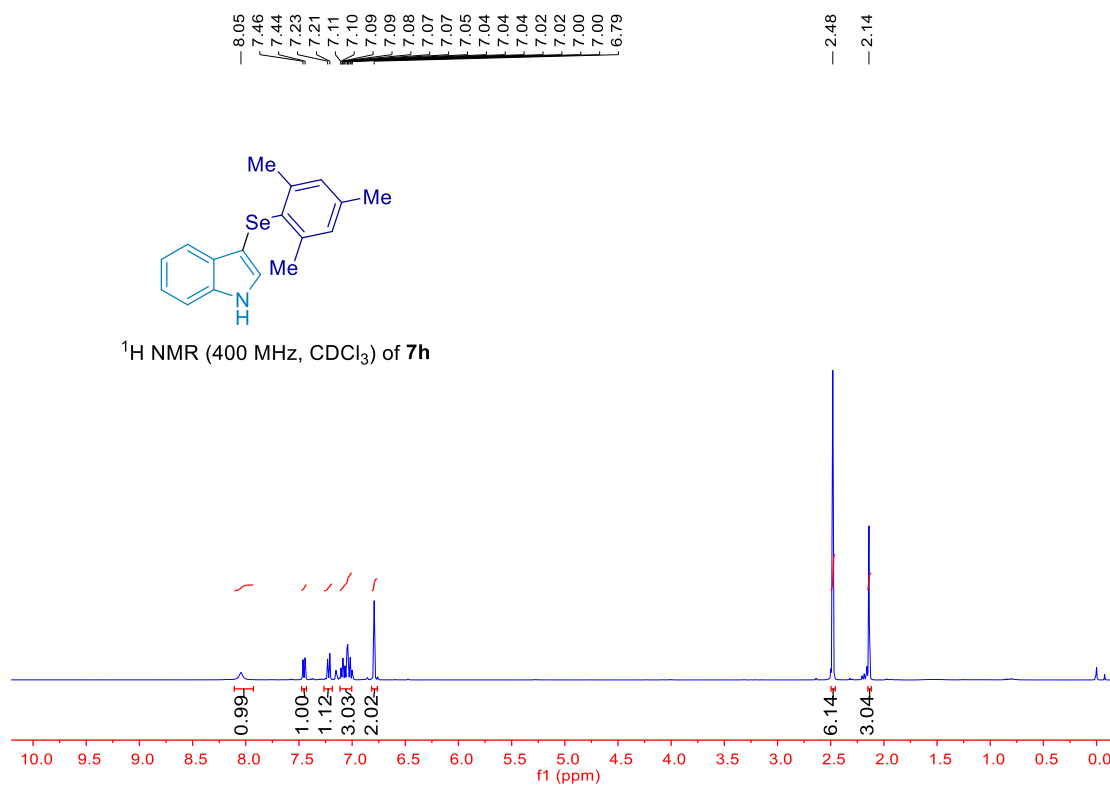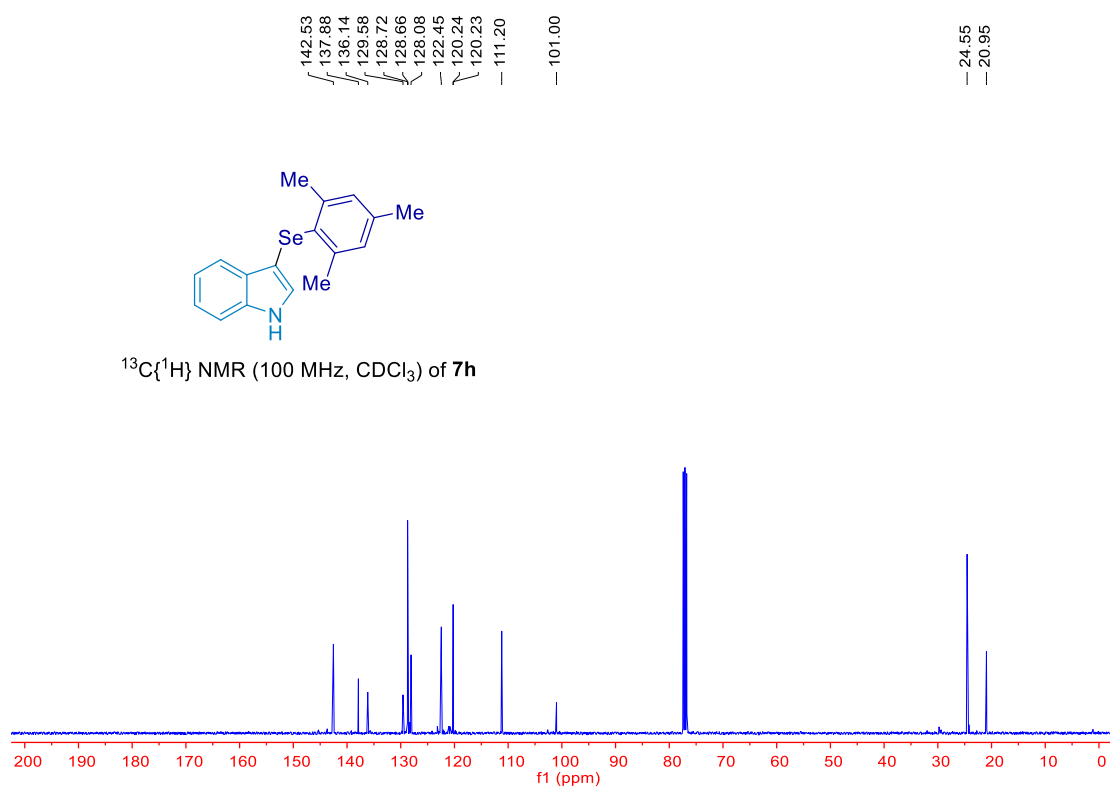

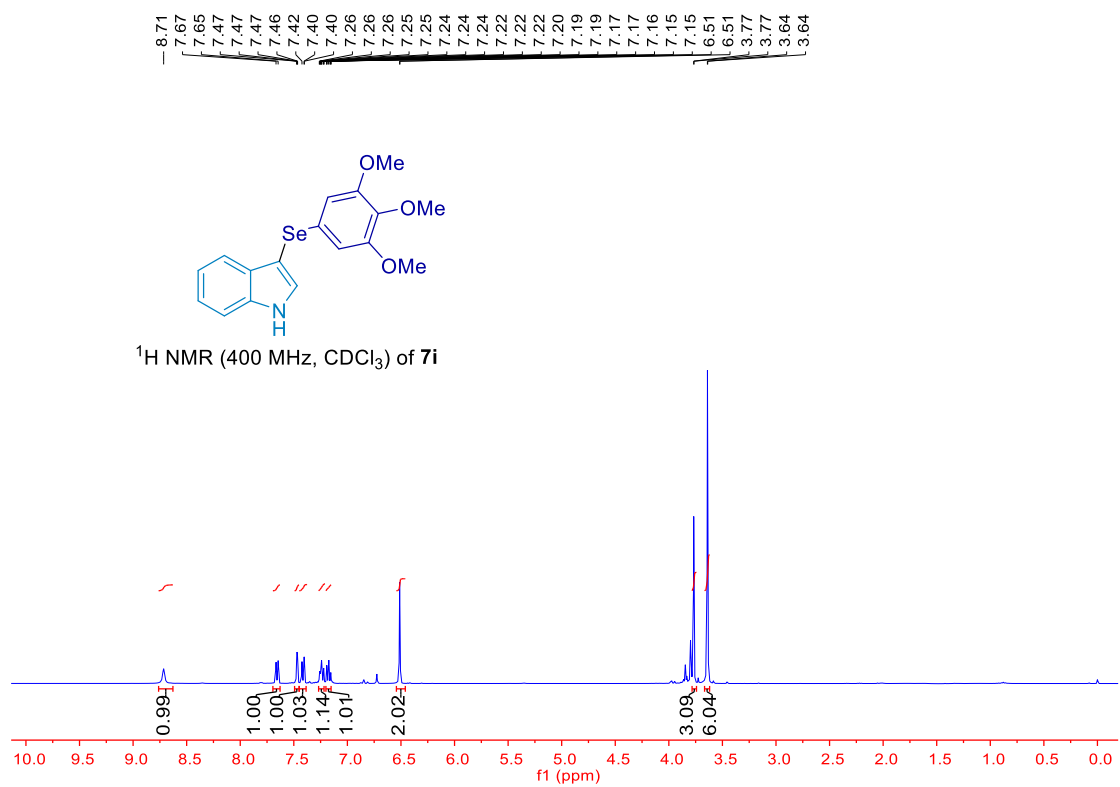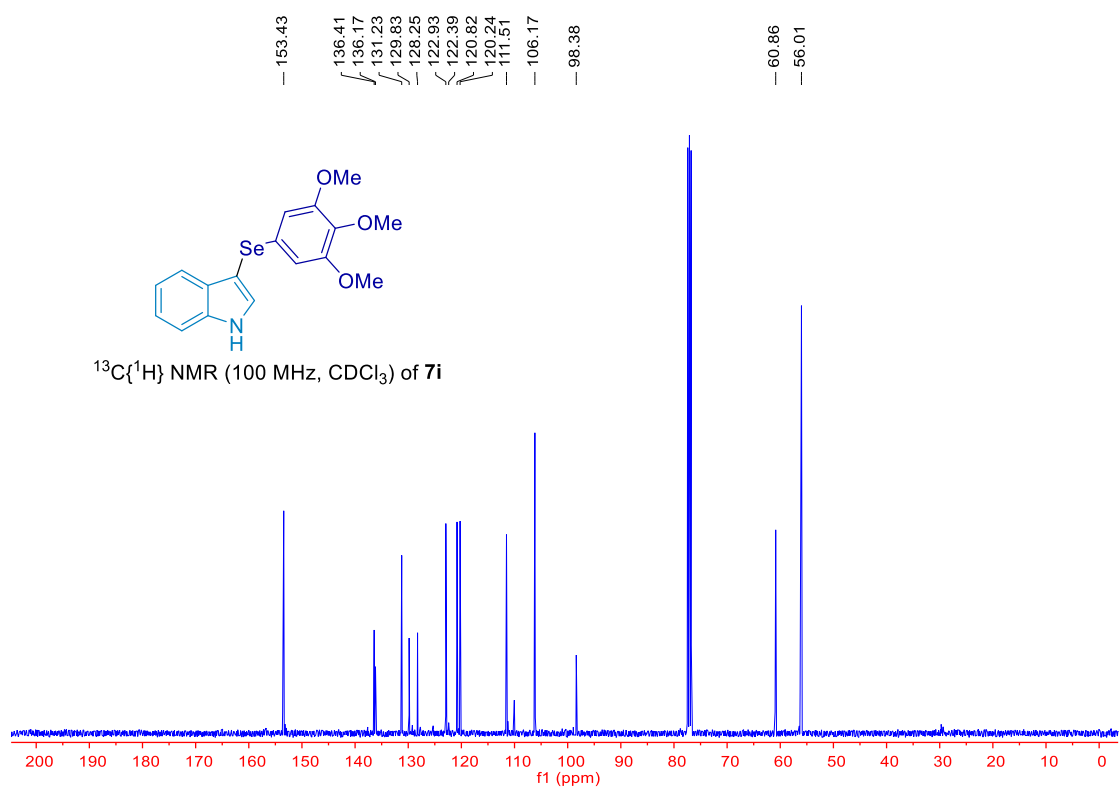

Supplement: d5nj03782d1.pdf [file d5nj03782d1.pdf]
